# Supplementary material for: Identification and Functional Annotation of Genes Related to Horses’ Performance: From GWAS to Post-GWAS
Source: MDPI journal article supplement (doi:10.3390/ani10071173), 2020-07-10
Supplement: s1 [file s1]

**Table S2.** Genotyping and quality control summary for the selected articles. The quality control performed in each article through the analysis of Hard-Weinberg Equilibrium (HWE), Call Frequency (CR), and Minor Allele Frequency (MAF). All the information were extracted from each article.

| Article<br>(publication year) | Sample size                        | Traits                                                                                          | SNP-chip (number<br>of markers used)               | Approach                                             | GWAS sig.<br>criteria<br>(value) | Quality control (removed markers) |       |        |
|-------------------------------|------------------------------------|-------------------------------------------------------------------------------------------------|----------------------------------------------------|------------------------------------------------------|----------------------------------|-----------------------------------|-------|--------|
|                               |                                    |                                                                                                 |                                                    |                                                      |                                  | HWE                               | CR    | MAF    |
| Meira <i>et al.</i> (2014a)   | 188                                | Morphometric traits (weight, rump length, and body length)                                      | Illumina EquineSNP50 Genotyping BeadChips (54,602) | Mixed model                                          | P-value                          | P < 0.001                         | <0.95 | <0.05  |
| Meira <i>et al.</i> (2014b)   | 112                                | Speed index                                                                                     | Illumina EquineSNP50 Genotyping BeadChips (54,602) | Mixed model                                          | P-value                          | P < 1 x 10 <sup>-3</sup>          | <0.9  | <0.05  |
| Shin <i>et al.</i> (2015)     | 1156 (240 stage 1 and 916 stage 2) | Estimated breeding value (EBV) of race time                                                     | Illumina EquineSNP50 Genotyping BeadChips (54,602) | Joint analyses                                       | P-value                          | P < 0.001                         | -     | <0.05  |
| Ricard <i>et al.</i> (2017)   | 597                                | Total race distance, average race speed and finishing status (qualified, eliminated or retired) | Illumina Equine SNP-74K chip (56,200)              | 3 models (Mixed model SNP based and haplotype based) | P-value                          | P > 10 <sup>-8</sup>              | ≥80%  | ≥ 0.01 |
| Velie <i>et al.</i> (2018)    | 661                                | Career earnings, best km time (s) and number of gallops                                         | 670 K Axiom Equine Genotyping Array                | Mixed model-structured association approach          | P-value                          | P < 1e-10                         | -     | <0.05  |

**Table S2. Cont.**

|                               |      |                                                                                    |                                                                                                                                           |                                                                                   |                               |                        |       |             |
|-------------------------------|------|------------------------------------------------------------------------------------|-------------------------------------------------------------------------------------------------------------------------------------------|-----------------------------------------------------------------------------------|-------------------------------|------------------------|-------|-------------|
| Pereira <i>et al.</i> (2018)  | 360  | Maximum speed index                                                                | Illumina EquineSNP50 Genotyping BeadChips (54,602) 120 animals (2011) / Illumina Equine SNP70 Genotyping BeadChips 65k 240 animals (2015) | Mixed model; single-step genomic best linear unbiased prediction (ssGBLUP) method | Total genetic variance (gVar) | $P < 1 \times 10^{-5}$ | <0.9  | <0.05       |
| McGivney <i>et al.</i> (2019) | 4499 | Racecourse starts                                                                  | Illumina EquineSNP50 Genotyping BeadChips (54,602), Illumina Equine SNP70 BeadChip 65k or Affymetrix AxiomTM Equine 670K SNP              | Random forests with mixed effects                                                 | P-value                       | -                      | <0.95 | <0.05       |
| Gmel <i>et al.</i> (2019)     | 524  | Joint angles (poll, elbow, carpal, fetlock (front and hind), hip, stifle, and hock | Affymetrix equine 670K SNP                                                                                                                | Mixed model                                                                       | P-value                       | $P < 0.0001$           | <0.90 | <0.05       |
| Bussiman <i>et al.</i> (2020) | 240  | Gait type                                                                          | Illumina Equine SNP70 Genotyping BeadChips 65k (48 animals - 2015) and Axiom® Equine Genotyping Array (192 animals)                       | Bayesian approach, Cluster and PCA, and Fivefold cross-validation                 | Additive genetic variance     | $P > 0.15$             | <0.95 | $\leq 0.01$ |
