# Supplementary material for: Identification and Functional Annotation of Genes Related to Horses’ Performance: From GWAS to Post-GWAS
Source: MDPI journal article supplement (doi:10.3390/ani10071173), 2020-07-10
Supplement: s1 [file s1]

**Table S3.** Genome-wide association studies summary for the selected articles and gene annotation. The number of SNPs/window were extracted from each article, as well as the respective Chromosome (Chr), position in base pair (bp), and candidate gene annotation.

| Article<br>(publication<br>year) | Trait                                                                  | Breed                        | #SNPs/window | Significant<br>SNPs/Region | Chr | Position***<br>in bp/start-<br>end | Candidate<br>gene<br>annotation                     | Candidate genes                                             |
|----------------------------------|------------------------------------------------------------------------|------------------------------|--------------|----------------------------|-----|------------------------------------|-----------------------------------------------------|-------------------------------------------------------------|
| Meira et al.<br>(2014a)          | morphometric<br>traits (weight,<br>rump length,<br>and body<br>length) | Quarter<br>Horse             | 13           | rs68562545                 | 2   | 98900000                           | 100 kb<br>upstream and<br>downstream<br>to each SNP | EIF4G3, HP1BP3, SH2D5, KIF17                                |
|                                  |                                                                        |                              |              | rs68614112                 | 2   | 103700000                          |                                                     | ANKRD50                                                     |
|                                  |                                                                        |                              |              | rs68626382                 | 2   | 33500000                           |                                                     |                                                             |
|                                  |                                                                        |                              |              | rs68488737                 | 3   | 26700000                           |                                                     | WVOX                                                        |
|                                  |                                                                        |                              |              | rs68488737                 | 3   | 26700000                           |                                                     | WVOX                                                        |
|                                  |                                                                        |                              |              | rs68559987                 | 3   | 29100000                           |                                                     | GAN, LOC102150591*, BCO1                                    |
|                                  |                                                                        |                              |              | rs68625621                 | 3   | 15000000                           |                                                     |                                                             |
|                                  |                                                                        |                              |              | rs68714893                 | 6   | 79400000                           |                                                     | AVPR1A, LOC106783311*                                       |
|                                  |                                                                        |                              |              | rs68762127                 | 7   | 34100000                           |                                                     | CHEK1, ACRV1, LOC100630076, STT3A, EI24,<br>LOC100630107    |
|                                  |                                                                        |                              |              | rs68795337                 | 8   | 32800000                           |                                                     | PTPRM                                                       |
|                                  |                                                                        |                              |              | rs68802762                 | 9   | 18500000                           |                                                     | MCMD2, LOC100052030, LOC102147850*                          |
|                                  |                                                                        |                              |              | rs69315059                 | 21  | 4100000                            |                                                     | LOC100054881, ATP13A1, LOC106782338*,<br>GMIP, LPAR2 (PBX4) |
|                                  |                                                                        |                              |              | rs69402054                 | 26  | 29900000                           |                                                     | IFNAR2, IL10RB, LOC102150829*, IFNAR1                       |
| Meira et al.<br>(2014b)          | Speed index                                                            | Quarter<br>Horse<br>(racing) | 8            | rs68593122                 | 2   | 97634986                           | 100 kb upstream and downstream to each SNP          |                                                             |
|                                  |                                                                        |                              |              | rs68593141                 | 2   | 97642160                           |                                                     | -                                                           |
|                                  |                                                                        |                              |              | rs69498497                 | 4   | 82402787                           |                                                     | GRM8, MIR592                                                |

|                    |                                             |              |    |               |    |          |                                                     |                     |
|--------------------|---------------------------------------------|--------------|----|---------------|----|----------|-----------------------------------------------------|---------------------|
|                    |                                             |              |    | rs68879046    | 10 | 52188059 |                                                     | GRIK2               |
|                    |                                             |              |    | rs69127140    | 18 | 33671391 |                                                     | NEB, RIF1           |
|                    |                                             |              |    | rs69134578    | 18 | 36917870 |                                                     | -                   |
|                    |                                             |              |    | rs69194990    | 18 | 39128343 |                                                     | CCDC148             |
|                    |                                             |              |    | rs69517755    | 27 | 3522223  |                                                     | ANK1, KAT6A         |
| Shin et al. (2015) | Estimated breeding value (EBV) of race time | Thoroughbred | 28 | BIEC2_906777  | 5  | 40747218 | within or 10 kb upstream and downstream to each SNP | LOC102151104        |
|                    |                                             |              |    | BIEC2_1026019 | 8  | 5906904  |                                                     | INPP5J, SELM, SMTN  |
|                    |                                             |              |    | BIEC2_1026200 | 8  | 6126833  |                                                     | OSBP2               |
|                    |                                             |              |    | BIEC2_1029757 | 8  | 11590300 |                                                     | -                   |
|                    |                                             |              |    | BIEC2_330101  | 16 | 14185461 |                                                     | -                   |
|                    |                                             |              |    | BIEC2_330360  | 16 | 15550375 |                                                     | -                   |
|                    |                                             |              |    | BIEC2_330495  | 16 | 16289366 |                                                     | CNTN3               |
|                    |                                             |              |    | BIEC2_330509  | 16 | 16334663 |                                                     | CNTN3               |
|                    |                                             |              |    | BIEC2_330558  | 16 | 16948655 |                                                     | PDZRN3              |
|                    |                                             |              |    | BIEC2_330572  | 16 | 16993987 |                                                     | PDZRN3              |
|                    |                                             |              |    | BIEC2_330575  | 16 | 16999220 |                                                     | PDZRN3              |
|                    |                                             |              |    | BIEC2_330578  | 16 | 17001997 |                                                     | PDZRN3              |
|                    |                                             |              |    | BIEC2_330677  | 16 | 17421511 |                                                     | PPP4R2              |
|                    |                                             |              |    | BIEC2_330691  | 16 | 17546589 |                                                     | GXYLT2              |
|                    |                                             |              |    | BIEC2_330725  | 16 | 17763943 |                                                     | -                   |
|                    |                                             |              |    | BIEC2_330739  | 16 | 17790340 |                                                     | -                   |
|                    |                                             |              |    | BIEC2_527753  | 20 | 29897398 |                                                     | VAR2, SFTA2, GTF2H4 |
|                    |                                             |              |    | BIEC2_527879  | 20 | 30126579 |                                                     | -                   |
|                    |                                             |              |    | BIEC2_529755  | 20 | 32127869 |                                                     | -                   |
|                    |                                             |              |    | BIEC2_529760  | 20 | 32131071 |                                                     | -                   |

|                      |                                                              |                                       |    |               |    |           |                                            |                                                                                                                                                                                                                                                                                          |
|----------------------|--------------------------------------------------------------|---------------------------------------|----|---------------|----|-----------|--------------------------------------------|------------------------------------------------------------------------------------------------------------------------------------------------------------------------------------------------------------------------------------------------------------------------------------------|
|                      |                                                              |                                       |    | BIEC2_554645  | 21 | 18154976  |                                            | ARL15                                                                                                                                                                                                                                                                                    |
|                      |                                                              |                                       |    | BIEC2_554739  | 21 | 18348602  |                                            | -                                                                                                                                                                                                                                                                                        |
|                      |                                                              |                                       |    | BIEC2_568963  | 21 | 47502588  |                                            | -                                                                                                                                                                                                                                                                                        |
|                      |                                                              |                                       |    | BIEC2_569862  | 21 | 48967346  |                                            | DAP                                                                                                                                                                                                                                                                                      |
|                      |                                                              |                                       |    | BIEC2_570062  | 21 | 49384234  |                                            | CCT5, FAM173B                                                                                                                                                                                                                                                                            |
|                      |                                                              |                                       |    | BIEC2_570485  | 21 | 49894191  |                                            | -                                                                                                                                                                                                                                                                                        |
|                      |                                                              |                                       |    | BIEC2_732151  | 28 | 17405077  |                                            | -                                                                                                                                                                                                                                                                                        |
|                      |                                                              |                                       |    | BIEC2_814518  | 30 | 3869336   |                                            | -                                                                                                                                                                                                                                                                                        |
| Ricard et al. (2017) | Total race distance, average race speed and finishing status | Arabian and crossed Arabian           | 6  | BIEC2_11782   | 1  | 25715334  | within                                     | SORCS3                                                                                                                                                                                                                                                                                   |
|                      |                                                              |                                       |    | BIEC2_1022884 | 6  | 79312770  |                                            | LOC106783311*                                                                                                                                                                                                                                                                            |
|                      |                                                              |                                       |    | BIEC2_363958  | 7  | 6283266   |                                            | -                                                                                                                                                                                                                                                                                        |
|                      |                                                              |                                       |    | BIEC2_977605  | 16 | 79466436  |                                            | -                                                                                                                                                                                                                                                                                        |
|                      |                                                              |                                       |    | BIEC2_755603  | 29 | 17580597  |                                            | SLC39A12                                                                                                                                                                                                                                                                                 |
|                      |                                                              |                                       |    | BIEC2_755604  | 29 | 17580992  |                                            | SLC39A12                                                                                                                                                                                                                                                                                 |
| Velie et al. (2018)  | Career earnings, Best km time (s) and Number of gallops      | Norwegian-Swedish coldblooder trotter | 32 | AX-103445942  | 1  | 151919692 | 500 kb upstream and downstream to each SNP | C1H15orf41, DPH6                                                                                                                                                                                                                                                                         |
|                      |                                                              |                                       |    | AX-104373992  | 1  | 162993722 |                                            | STXBP6, LOC100052901, LOC100052951, LOC100052742*, LOC100052638, LOC100052689, LOC100052582, LOC100052526, LOC100049805, LOC100052229, LOC106782233*, LOC102150430*, LOC100052292, LOC106782231*, LOC106782222*, LOC100033969, LOC100050554*, LOC102150071*, LOC100147522, LOC100052107* |
|                      |                                                              |                                       |    | AX-104568609  | 1  | 159285045 |                                            | **                                                                                                                                                                                                                                                                                       |

|                     |                                                                  |                                                 |    |              |   |          |                                                                                                                                                                                                                                                                                      |                                                                                                                                                                                                                                                                                             |
|---------------------|------------------------------------------------------------------|-------------------------------------------------|----|--------------|---|----------|--------------------------------------------------------------------------------------------------------------------------------------------------------------------------------------------------------------------------------------------------------------------------------------|---------------------------------------------------------------------------------------------------------------------------------------------------------------------------------------------------------------------------------------------------------------------------------------------|
| Velie et al. (2018) | Career earnings,<br>Best km time (s)<br>and Number of<br>gallops | Norwegian-<br>Swedish<br>coldblooder<br>trotter | 32 | AX-103803214 | 2 | 21466714 | 500 kb<br>upstream and<br>downstream<br>to each SNP                                                                                                                                                                                                                                  | OSCP1, LOC102150623*, CSF3R, STK40,<br>MRPS15, LSM10, THRAP3, SH3D21, EVA1B,<br>AGO3, COL8A2, TRAPPC3, MAP7D1,<br>LOC102150891*, ADPRHL2, TEKT2,<br>LOC100055196(AGO4), LOC106782791*,<br>LOC100055148(AGO1), CLSPN, C2H1orf216,<br>PSMB2, TFAP2E, NCDN, KIAA0319L,<br>LOC102147570*, ZMYM4 |
|                     |                                                                  |                                                 |    | AX-104450418 | 2 | 21311680 | OSCP1, LOC102150623*, CSF3R, STK40,<br>MRPS15, LSM10, THRAP3, SH3D21, EVA1B,<br>AGO3, COL8A2, TRAPPC3, MAP7D1,<br>LOC102150891*, ADPRHL2, TEKT2,<br>LOC100055196(AGO4), LOC106782791*,<br>LOC100055148(AGO1), CLSPN, C2H1orf216,<br>PSMB2, TFAP2E, NCDN, KIAA0319L,<br>LOC102147570* |                                                                                                                                                                                                                                                                                             |
|                     |                                                                  |                                                 |    | AX-103090138 | 6 | 42063985 | GUCY2C, WBP11, ERP27, ARHGDIB, PDE6H,<br>C6H12orf60, SMCO3, ART4, MGP,<br>LOC100063835 (H4-16), LOC102150778 (H2AJ) ,<br>ATF7IP, PLBD1, LOC102150749*                                                                                                                                |                                                                                                                                                                                                                                                                                             |
|                     |                                                                  |                                                 |    | AX-103248294 | 6 | 49512490 | SOX5                                                                                                                                                                                                                                                                                 |                                                                                                                                                                                                                                                                                             |
|                     |                                                                  |                                                 |    | AX-104307051 | 6 | 41329519 | GRIN2B, EMP1, LOC102150193*, GSG1,<br>LOC102150077*                                                                                                                                                                                                                                  |                                                                                                                                                                                                                                                                                             |
|                     |                                                                  |                                                 |    | AX-104494389 | 6 | 20020914 | LOC100065342, USP40, DGKD, ATG16L1,<br>INPP5D, NEU2, NGEF, GIGYF2, KCNJ13,<br>LOC106783256*, EFHD1, LOC106783248*,<br>LOC106783249*, ECEL1, CHRND, PRSS56,<br>EIF4E2, CHRNG                                                                                                          |                                                                                                                                                                                                                                                                                             |
|                     |                                                                  |                                                 |    | AX-104611735 | 6 | 47132529 | PDE3A, SLCO1A2, IAPP, LOC100068155<br>(SLCO1B3), SLCO1C1                                                                                                                                                                                                                             |                                                                                                                                                                                                                                                                                             |
|                     |                                                                  |                                                 |    | AX-104711589 | 6 | 41462481 | GRIN2B, ATF7IP                                                                                                                                                                                                                                                                       |                                                                                                                                                                                                                                                                                             |
|                     |                                                                  |                                                 |    | AX-104117851 | 7 | 65266179 | LOC100630698*, MIR708, LOC100062728<br>(TENM4)                                                                                                                                                                                                                                       |                                                                                                                                                                                                                                                                                             |

|                     |                                                                  |                                                 |    |              |    |          |                                                                                                                                                                                                  |                                                                                                       |
|---------------------|------------------------------------------------------------------|-------------------------------------------------|----|--------------|----|----------|--------------------------------------------------------------------------------------------------------------------------------------------------------------------------------------------------|-------------------------------------------------------------------------------------------------------|
| Velie et al. (2018) | Career earnings,<br>Best km time (s)<br>and Number of<br>gallops | Norwegian-<br>Swedish<br>coldblooder<br>trotter | 32 | AX-104865129 | 16 | 18366321 | 500 kb<br>upstream and<br>downstream<br>to each SNP                                                                                                                                              | RYBP, LOC102148599*, LOC102148566*,<br>MIR9170, LOC106781771*, EIF4E3,<br>LOC102148998*, PROK2, FOXP1 |
|                     |                                                                  |                                                 |    | AX-104219924 | 17 | 19525955 | -                                                                                                                                                                                                |                                                                                                       |
|                     |                                                                  |                                                 |    | AX-104538418 | 17 | 21083126 | LOC102150380*, LOC102150326*,<br>LOC106781872*, TRIM13, LOC102150424*,<br>SPRYD7, KCNRG, MIR3613, MIR16-2, KPNA3,<br>ARL11, LOC102150635*, EBPL, LOC102150605*,<br>LOC106781885*, MIR15A, RCBTB1 |                                                                                                       |
|                     |                                                                  |                                                 |    | AX-104591507 | 17 | 20813164 | RNASEH2B, LOC102150008*, DLEU7,<br>LOC102150326*, LOC106781872*, TRIM13,<br>LOC102150424*, SPRYD7, KCNRG, MIR3613,<br>MIR16-2, MIR15A                                                            |                                                                                                       |
|                     |                                                                  |                                                 |    | AX-104645782 | 17 | 19318167 | LOC100054677*, LOC100630841,<br>LOC106781883*, VPS36, THSD1, CKAP2, NEK5,<br>NEK3, ALG11, ATP7B, CCDC70, DHRS12,<br>WDFY2, LOC106781884*, INT56                                                  |                                                                                                       |
|                     |                                                                  |                                                 |    | AX-102964033 | 23 | 22423197 | DMRT1, LOC102147582*, KANK1,<br>LOC106782466*, DOCK8,<br>LOC100050598(CBWD1), PGM5, TMEM252,<br>LOC100057291                                                                                     |                                                                                                       |
|                     |                                                                  |                                                 |    | AX-102982528 | 23 | 23324996 | DMRT1, LOC100147177(DMRT3), DMRT2                                                                                                                                                                |                                                                                                       |
|                     |                                                                  |                                                 |    | AX-103166989 | 23 | 22496787 | DMRT1, LOC102147582*, KANK1,<br>LOC106782466*, DOCK8,<br>LOC100050598(CBWD1), PGM5, TMEM252,<br>LOC100057291, LOC100147177                                                                       |                                                                                                       |

|                     |                                                                  |                                                 |    |              |    |          |                                                     |                                                                                                                                           |
|---------------------|------------------------------------------------------------------|-------------------------------------------------|----|--------------|----|----------|-----------------------------------------------------|-------------------------------------------------------------------------------------------------------------------------------------------|
| Velie et al. (2018) | Career earnings,<br>Best km time (s)<br>and Number of<br>gallops | Norwegian-<br>Swedish<br>coldblooder<br>trotter | 32 | AX-103261370 | 23 | 22522071 | 500 kb<br>upstream and<br>downstream<br>to each SNP | DMRT1, LOC100147177 (DMRT3),<br>LOC102147582*, KANK1, LOC106782466*,<br>DOCK8, LOC100050598(CBWD1),<br>LOC100057291(FOXD4), PGM5, TMEM252 |
|                     |                                                                  |                                                 |    | AX-103287280 | 23 | 21064571 |                                                     | FXN, LOC106782465*, TJP2, FAM189A2,<br>APBA1, PTAR1, C23H9orf135, MAMDC2,<br>SMC2, LOC106782493*                                          |
|                     |                                                                  |                                                 |    | AX-103530176 | 23 | 22464604 |                                                     | DMRT1, LOC102147582*, KANK1,<br>LOC106782466*, DOCK8, LOC100050598<br>(CBWD1), PGM5, TMEM252, LOC100057291                                |
|                     |                                                                  |                                                 |    | AX-103762427 | 23 | 22461979 |                                                     | DMRT1, LOC102147582*, KANK1,<br>LOC106782466*, DOCK8,<br>LOC100050598(CBWD1), PGM5, TMEM252,<br>LOC100057291                              |
|                     |                                                                  |                                                 |    | AX-104144838 | 23 | 23333501 |                                                     | DMRT1, LOC100147177(DMRT3), DMRT2                                                                                                         |

|                     |                                                                  |                                                 |    |              |    |          |                                                     |                                                                                                                                                                                                                                                                                                                                                                                                                                                                                                                                                                                                                  |
|---------------------|------------------------------------------------------------------|-------------------------------------------------|----|--------------|----|----------|-----------------------------------------------------|------------------------------------------------------------------------------------------------------------------------------------------------------------------------------------------------------------------------------------------------------------------------------------------------------------------------------------------------------------------------------------------------------------------------------------------------------------------------------------------------------------------------------------------------------------------------------------------------------------------|
| Velie et al. (2018) | Career earnings,<br>Best km time (s)<br>and Number of<br>gallops | Norwegian-<br>Swedish<br>coldblooder<br>trotter | 32 | AX-104268231 | 23 | 21689609 | 500 kb<br>upstream and<br>downstream<br>to each SNP | PGM5, TMEM252, FAM122A, PIP5K1B,<br>LOC106782465*, FXN, TJP2, FAM189A2, APBA1                                                                                                                                                                                                                                                                                                                                                                                                                                                                                                                                    |
|                     |                                                                  |                                                 |    | AX-104634248 | 23 | 21857316 |                                                     | PGM5, LOC100050598(CBWD1),<br>LOC100057291, TEM252, FAM122A, PIP5K1B,<br>LOC106782465*, FXN, TJP2, FAM189A2                                                                                                                                                                                                                                                                                                                                                                                                                                                                                                      |
|                     |                                                                  |                                                 |    | AX-103305676 | 25 | 26866219 |                                                     | LOC100071486, LOC100071469, LOC100071460,<br>LOC100071448, LOC100071445, LOC100071420,<br>LOC100071438, LOC106782596*,<br>LOC100071407, LOC100071402, LOC100071358,<br>LOC100071365, LOC100071352(OR1N1),<br>LOC100071338, LOC100071346, LOC100071332,<br>LOC100071329, LOC100071311, LOC100071297,<br>LOC100071264, LOC100071270,<br>LOC100071275(OR1B1),<br>LOC100071278(OR1Q1), LOC100071227,<br>LOC100071251, LOC100067520, LOC100071258,<br>LOC100071218, LOC100071244, LOC100071212,<br>LOC100071189(OR5C1),<br>LOC100067499(OR1K1), LOC100071170, PDCL,<br>RC3H2, ZBTB26, ZBTB6, RABGAP1, GPR21,<br>STRBP |
|                     |                                                                  |                                                 |    | AX-103147507 | 28 | 22153465 |                                                     | NEDD1, LOC102149424*, LOC106782711*,<br>MIR135A-2                                                                                                                                                                                                                                                                                                                                                                                                                                                                                                                                                                |
|                     |                                                                  |                                                 |    | AX-104828170 | 28 | 20006740 |                                                     | NDUFA12, PLXNC1, CEP83, TMCC3, NR2C1,<br>FGD6, MIR331                                                                                                                                                                                                                                                                                                                                                                                                                                                                                                                                                            |
|                     |                                                                  |                                                 |    | AX-103734745 | 29 | 24530437 |                                                     |                                                                                                                                                                                                                                                                                                                                                                                                                                                                                                                                                                                                                  |
|                     |                                                                  |                                                 |    | AX-104642194 | 31 | 14300483 |                                                     | MTRF1L, FBXO5, SYNE1, MYCT1, VIP, RGS17,<br>LOC106782928*, LOC106782927*                                                                                                                                                                                                                                                                                                                                                                                                                                                                                                                                         |

---

|                          |                        |                           |                               |           |   |                        |                     |                                                                                                                                                                    |
|--------------------------|------------------------|---------------------------|-------------------------------|-----------|---|------------------------|---------------------|--------------------------------------------------------------------------------------------------------------------------------------------------------------------|
| Pereira et al.<br>(2018) | Maximum<br>speed index | Quarter Horse<br>(racing) | 33 SNPS<br>windows of<br>1 Mb | SS1_REG01 | 1 | 20721039 –<br>21689628 | within <sup>a</sup> | DUSP5, ADD3, XPNPEP1, MXI1, SMC3, RBM20                                                                                                                            |
|                          |                        |                           |                               | SS1_REG02 | 1 | 61826124 –<br>62818065 |                     | ADK, KAT6B, DUSP13, SAMD8, COMTD1,<br>VDAC2, DUPD1, LOC102149419*,<br>LOC106782060*                                                                                |
|                          |                        |                           |                               | SS1_REG03 | 2 | 69370047 –<br>70369774 |                     | MSMO1, KLHL2, TMEM192, CPE, APELA,<br>LOC100061588, LOC100629609, LOC100068191,<br>LOC100068208, LOC100068320                                                      |
|                          |                        |                           |                               | SS1_REG04 | 3 | 65380573 –<br>66369357 |                     | LOC100066359, LOC100066444, LOC100066472,<br>LOC100066501, LOC106783008*,<br>LOC100067994, LOC100068026, LOC100068012,<br>LOC100068026, LOC100068041, LOC100146977 |
|                          |                        |                           |                               | SS2_REG01 | 3 | 63351099 –<br>64348556 |                     | GC, DCK, MOB1B, GRSF1, RUFY3, UTP3,<br>ENAM, JCHAIN, SLC4A4                                                                                                        |
|                          |                        |                           |                               | SS2_REG02 | 5 | 62937896 –<br>63920127 |                     | COL11A1, RNPC3, LOC100049851,<br>LOC102147595*                                                                                                                     |
|                          |                        |                           |                               | SS1_REG05 | 8 | 30526194 –<br>31504074 |                     | LOC106780945*, LOC102147433*, L3MBTL4,<br>TMEM200C, LOC106780946,<br>LOC100059101(EPB41L3)                                                                         |
|                          |                        |                           |                               | SS1_REG06 | 8 | 62566792 –<br>63559486 |                     | RIT2, SYT4                                                                                                                                                         |
|                          |                        |                           |                               | SS2_REG03 | 9 | 66879753 –<br>67826611 |                     | ZNF572, SQLE, KIAA0196(WASHC5),<br>NSMCE2, TRIB1, LOC106780992*,<br>LOC106780991*                                                                                  |



|                          |                        |                           |                               |           |    |                        |                     |                                                                                                                                                                           |
|--------------------------|------------------------|---------------------------|-------------------------------|-----------|----|------------------------|---------------------|---------------------------------------------------------------------------------------------------------------------------------------------------------------------------|
| Pereira et al.<br>(2018) | Maximum<br>speed index | Quarter Horse<br>(racing) | 33 SNPs<br>windows of<br>1 Mb | SS1_REG07 | 10 | 57990860 –<br>58961242 | within <sup>a</sup> | NR2E1, SNX3, LACE1(AFG1L), FOXO3,<br>ARMC2, SESN1, CEP57L1, OSTM1,<br>LOC102151001*                                                                                       |
|                          |                        |                           |                               | SS1_REG08 | 10 | 58997563 –<br>59976633 |                     | PPIL6, SMPD2, MICAL1, ZBTB24, FIG4,<br>WASF1, CDC40, METTL24, DDO,<br>LOC102147700*, LOC102147733*,<br>LOC102147786, AK9, LOC100630272(CD164),<br>LOC106782267*, SLC22A16 |
|                          |                        |                           |                               | SS2_REG04 | 10 | 58735380 –<br>59710571 |                     | ARMC2, SESN1, CEP57L1, PPIL6, SMPD2,<br>MICAL1, ZBTB24, FIG4, WASF1, AK9,<br>LOC100630272(CD164), LOC106782267*,<br>LOC102147733*, LOC102147700*,<br>LOC102147786         |
|                          |                        |                           |                               | SS1_REG09 | 11 | 3345863 –<br>4341072   |                     | RBFOX3, ENGASE, C1QTNF1, CANT1,<br>LGALS3BP, TIMP2, USP36, CYTH1, DNAH17,<br>PGS1, SOCS3, TMEM235, AFMID                                                                  |
|                          |                        |                           |                               | SS1_REG10 | 11 | 35523097 –<br>36481549 |                     | CA4, ZNHIT3, MYO19, PIGW, GGNBP2,<br>DHRS11, MRM1, LHX1, AATF, ACACA,<br>LOC100071389*, USP32                                                                             |
|                          |                        |                           |                               | SS1_REG11 | 15 | 45572062 –<br>46563225 |                     | SPTBN1, ACYP2, LOC106781739*, ASB3,<br>CHAC2, PSME4, ERLEC1, GPR75,<br>LOC106781738*, C15H2orf73, LOC102148694*                                                           |
|                          |                        |                           |                               | SS1_REG12 | 15 | 46601694 –<br>47575761 |                     | LOC102149170*                                                                                                                                                             |
|                          |                        |                           |                               | SS1_REG13 | 15 | 76296526 –<br>77289510 |                     | KCNS3, MSGN1, GEN1, SMC6, VSNL1,<br>RDH14, LOC100056590                                                                                                                   |

|                          |                        |                           |                               |           |    |                        |                     |                                                                                                                             |
|--------------------------|------------------------|---------------------------|-------------------------------|-----------|----|------------------------|---------------------|-----------------------------------------------------------------------------------------------------------------------------|
| Pereira et al.<br>(2018) | Maximum<br>speed index | Quarter Horse<br>(racing) | 33 SNPs<br>windows of<br>1 Mb | SS1_REG14 | 15 | 82855154 –<br>83838250 | within <sup>a</sup> | NOL10, ODC1, HPCAL1, RRM2, KLF11,<br>GRHL1, TAF1B, YWHAQ, ADAM17,<br>LOC106781712*, LOC102149884(CYS1),<br>LOC102149855*    |
|                          |                        |                           |                               | SS1_REG15 | 15 | 87766362 –<br>88753736 |                     | ALLC, COLEC11, RPS7, ADI1, TRAPPC12,<br>DCDC2C, LOC102147742*                                                               |
|                          |                        |                           |                               | SS2_REG05 | 15 | 53973327 –<br>54889258 |                     | SLC3A1, PREPL, PPM1B, LRPPRC, ABCG8,<br>ABCG5, DYNC2LI1, PLEKHH2, CAMKMT,<br>LOC106781689*, LOC102147346*,<br>LOC106781702* |
|                          |                        |                           |                               | SS2_REG06 | 15 | 72126768 –<br>73121731 |                     | KLHL29, LOC106781710*, LOC106781709*                                                                                        |
|                          |                        |                           |                               | SS2_REG07 | 15 | 75795552 –<br>76782973 |                     | RDH14, LOC100056590                                                                                                         |
|                          |                        |                           |                               | SS1_REG16 | 16 | 16542440 –<br>17474810 |                     | PDZRN3, PPP4R2, GXYLT2, LOC106781787*,<br>LOC106781788*                                                                     |
|                          |                        |                           |                               | SS1_REG17 | 16 | 17542693 –<br>18503480 |                     | SHQ1, RYBP, GXYLT2, LOC102148566*,<br>LOC102148599*, MIR9170, LOC106781771*,<br>PROK2                                       |
|                          |                        |                           |                               | SS1_REG18 | 16 | 77697272 –<br>78681644 |                     | LOC102148929*, LOC106781810*,<br>LOC106781811*, C16H3orf58(DIPK2A)                                                          |
|                          |                        |                           |                               | SS2_REG08 | 20 | 59429342 –<br>60422986 |                     | LOC102151117*                                                                                                               |
|                          |                        |                           |                               | SS1_REG19 | 22 | 10868934 –<br>11861413 |                     | TASP1, ISM1, SPTLC3, LOC106782388*                                                                                          |
|                          |                        |                           |                               | SS2_REG09 | 22 | 10600456 –<br>11589137 |                     | TASP1, ISM1, SPTLC3, LOC106782388*,<br>LOC102149908*                                                                        |

|                           |                        |                           |                               |            |    |                        |                                                        |                                                                                                                                                                                                             |
|---------------------------|------------------------|---------------------------|-------------------------------|------------|----|------------------------|--------------------------------------------------------|-------------------------------------------------------------------------------------------------------------------------------------------------------------------------------------------------------------|
| Pereira et al.<br>(2018)  | Maximum<br>speed index | Quarter Horse<br>(racing) | 33 SNPs<br>windows of<br>1 Mb | SS2_REG10  | 22 | 14927558 –<br>15876595 | within <sup>a</sup>                                    | PLCB1, TMX4, HAO1                                                                                                                                                                                           |
|                           |                        |                           |                               | SS1_REG20  | 25 | 17757118 –<br>18713444 |                                                        | ZFP37, SLC31A2, FKBP15, SLC31A1, CDC26,<br>PRPF4, RNF183, WDR31, BSPRY, HDHD3,<br>ALAD, RGS3, POLE3, LOC100056127,<br>LOC106782558*, LOC100034197                                                           |
|                           |                        |                           |                               | SS1_REG21  | 25 | 18768518 –<br>19722839 |                                                        | ZNF618, AMBP, KIF12, COL27A1, AKNA,<br>ATP6V1G1, TNFSF15, TNFSF8, TNC,<br>LOC106782561*, LOC102149355*,<br>LOC106782560(TEX48), LOC100051420,<br>LOC100050034, LOC100051562,<br>LOC106782559*, LOC100050100 |
|                           |                        |                           |                               | SS2_REG11  | 25 | 18073334 –<br>19043039 |                                                        | SLC31A2, FKBP15, SLC31A1, CDC26, PRPF4,<br>RNF183, WDR31, BSPRY, HDHD3, AMBP,<br>LOC106782559*, C25H9orf43, POLE3<br>ALAD, RGS3, ZNF618, AMBP, KIF12, COL27A1                                               |
|                           |                        |                           |                               | SS2_REG12  | 30 | 138095 –<br>1097585    |                                                        | HNRNPU, DESI2, ADSS2, ZBTB18,<br>C30H1orf100, C30H1orf101(CATSPERE),<br>LOC102148849*, LOC100630213(COX20)                                                                                                  |
| McGivney et al.<br>(2019) | racecourse starts      | Thoroughbred              | 14                            | BIEC2-1004 | 7  | 62413693               | 500 kb up and<br>downstream<br>of the<br>flanking SNPs | CCDC90B, ANKRD42, PCF11, RAB30, PRCP,<br>DDIAS                                                                                                                                                              |
|                           |                        |                           |                               | BIEC2-1051 | 7  | 41738138               |                                                        | SPATA9, IGSF9B, LOC102150790*                                                                                                                                                                               |
|                           |                        |                           |                               | BIEC2-9966 | 7  | 41367656               |                                                        | OPCML                                                                                                                                                                                                       |
|                           |                        |                           |                               | BIEC2-9966 | 7  | 40454393               |                                                        | NTM, OPCML                                                                                                                                                                                                  |
|                           |                        |                           |                               | BIEC2-9966 | 7  | 41489510               |                                                        | OPCML                                                                                                                                                                                                       |
|                           |                        |                           |                               | BIEC2-9966 | 7  | 41537197               |                                                        | OPCML, SPATA9                                                                                                                                                                                               |
|                           |                        |                           |                               | BIEC2-9966 | 7  | 40710230               |                                                        | NTM, OPCML                                                                                                                                                                                                  |
|                           |                        |                           |                               | BIEC2-9966 | 7  | 40713658               |                                                        | NTM, OPCML                                                                                                                                                                                                  |
|                           |                        |                           |                               | BIEC2-9966 | 7  | 41492057               |                                                        | OPCML                                                                                                                                                                                                       |

|                           |                                                                                     |                                 |    |              |    |           |                                                               |                                                                                                      |
|---------------------------|-------------------------------------------------------------------------------------|---------------------------------|----|--------------|----|-----------|---------------------------------------------------------------|------------------------------------------------------------------------------------------------------|
| McGivney et al.<br>(2019) | racecourse starts                                                                   | Thoroughbred                    | 14 | BIEC2-9966   | 7  | 41363562  | 500 kb up and downstream of the flanking SNPs                 | OPCML                                                                                                |
|                           |                                                                                     |                                 |    | BIEC2-9966   | 7  | 41363409  |                                                               | OPCML                                                                                                |
|                           |                                                                                     |                                 |    | BIEC2-9966   | 7  | 40217482  |                                                               | NTM, OPCML                                                                                           |
|                           |                                                                                     |                                 |    | BIEC2-9967   | 7  | 41818480  |                                                               | SPATA9, IGSF9B, LOC102150790*, JAM3, NCAPD3                                                          |
|                           |                                                                                     |                                 |    | BIEC2-9967   | 7  | 41799089  |                                                               | SPATA9, IGSF9B, LOC102150790*, JAM3, NCAPD3                                                          |
| Gmel et al.<br>(2019)     | joint angles (poll, elbow, carpal, fetlock (front and hind), hip, stifle, and hock) | Franches-Montagnes and Lipizzan | 14 | AX-103779310 | 1  | 124405158 | 200 kb up and downstream of the significant or suggestive QTL | CORO2B, ITGA11, LOC106782204*, FEM1B                                                                 |
|                           |                                                                                     |                                 |    | AX-105008533 | 3  | 106128177 |                                                               | QDPR, CLRN2, LAP3, MED28, FAM184B                                                                    |
|                           |                                                                                     |                                 |    | AX-104691515 | 4  | 37412203  |                                                               | BET1, TFPI2, GNG11, GNGT1                                                                            |
|                           |                                                                                     |                                 |    | AX-103944161 | 7  | 42659817  |                                                               | LOC100072895, LOC100072904, LOC100072910(GLB1L2), LOC106783347*, LOC102151035*, B3GAT1               |
|                           |                                                                                     |                                 |    | AX-102974274 | 8  | 19266146  |                                                               | OAS2, RASAL1, CFAP73, DDX54, DTX1, IQCD, RITA1, TPCN1, LOC106783487*, SLC8B1, PLBD2, SDS, SDSL, LHX5 |
|                           |                                                                                     |                                 |    | AX-103391767 | 20 | 49183107  |                                                               | PKHD1, LOC106782309*                                                                                 |
|                           |                                                                                     |                                 |    | AX-103234126 | 21 | 30166547  |                                                               | RAI14, TTC23L, BRIX1, RAD1, AGXT2, DNAJC21, LOC106782348*, PRLR                                      |
|                           |                                                                                     |                                 |    | AX-104124989 | 21 | 30263265  |                                                               | -                                                                                                    |
|                           |                                                                                     |                                 |    | AX-104559840 | 23 | 49183107  |                                                               | TMEM215, NDUFB6, TOPORS, LOC102149554*, ACO1, DDX58                                                  |

|                           |                                                                                                    |                                        |    |              |    |          |                                                                              |                                                                                                                                                                                         |
|---------------------------|----------------------------------------------------------------------------------------------------|----------------------------------------|----|--------------|----|----------|------------------------------------------------------------------------------|-----------------------------------------------------------------------------------------------------------------------------------------------------------------------------------------|
| Gmel et al.<br>(2019)     | joint angles<br>(poll, elbow,<br>carpal, fetlock<br>(front and hind),<br>hip, stifle, and<br>hock) | Franches-<br>Montagnes and<br>Lipizzan | 14 | AX-103624054 | 27 | 22021462 | 200 kb up and<br>downstream<br>of the<br>significant or<br>suggestive<br>QTL | -                                                                                                                                                                                       |
|                           |                                                                                                    |                                        |    | AX-103396551 | 28 | 12101898 |                                                                              | -                                                                                                                                                                                       |
|                           |                                                                                                    |                                        |    | AX-103978374 | 28 | 12102163 |                                                                              | LRRIQ1, ALX1                                                                                                                                                                            |
|                           |                                                                                                    |                                        |    | AX-104440677 | 28 | 12106363 |                                                                              | -                                                                                                                                                                                       |
|                           |                                                                                                    |                                        |    | AX-103649839 | 29 | 18799958 |                                                                              | RSU1, C1QL3, PTER                                                                                                                                                                       |
| Bussiman et al.<br>(2020) | gait type                                                                                          | Mangalarga<br>Marchador                | 22 | -            | 4  | 95530303 | 250 kb<br>genomic<br>window (125<br>kb up and<br>downstream<br>to each SNP)  | LOC102148563**, LOC106783092**,<br>LOC106783093*, LOC106783105**,<br>LOC106783094*, LOC106783095*,<br>LOC106783096**, LOC100055383**,<br>LOC102150403*                                  |
|                           |                                                                                                    |                                        |    | -            | 4  | 95541786 |                                                                              | LOC106783092**, LOC106783093*,<br>LOC106783105**, LOC106783094*,<br>LOC106783095*, LOC106783096**,<br>LOC100055383**, LOC102150403*,<br>LOC102150354**                                  |
|                           |                                                                                                    |                                        |    | -            |    |          |                                                                              |                                                                                                                                                                                         |
|                           |                                                                                                    |                                        |    | -            |    |          |                                                                              |                                                                                                                                                                                         |
|                           |                                                                                                    |                                        |    | -            |    |          |                                                                              |                                                                                                                                                                                         |
|                           |                                                                                                    |                                        |    | -            | 4  | 95644265 |                                                                              | LOC106783094*, LOC106783095*,<br>LOC106783096**, LOC100055383**,<br>LOC102150403*, LOC102150354**,<br>LOC100629784*, LOC106783106*,<br>LOC102150258**, LOC102150225*,<br>LOC100629906*  |
|                           |                                                                                                    |                                        |    | -            | 4  | 95704189 |                                                                              | LOC106783095*, LOC106783096**,<br>LOC100055383**, LOC102150403*,<br>LOC102150354**, LOC100629784*,<br>LOC106783106*, LOC102150258**,<br>LOC102150225*, LOC100629906*,<br>LOC102150165** |

|                           |           |                         |    |   |    |          |                                                                            |                                                                                                                   |
|---------------------------|-----------|-------------------------|----|---|----|----------|----------------------------------------------------------------------------|-------------------------------------------------------------------------------------------------------------------|
| Bussiman et al.<br>(2020) | gait type | Mangalarga<br>Marchador | 22 | - | 4  | 95843696 | 250 kb<br>genomic<br>window (125<br>kb up and<br>downstream<br>to each SNP | LOC100055383**, LOC102150225*,<br>LOC100629906*, LOC102150165**,<br>LOC100055297, LOC100629325**, EPHB6,<br>TRPV6 |
|                           |           |                         |    | - | 6  | 26511708 |                                                                            | SNED1, MTERF4, PASK, PPP1R7, ANO7,<br>LOC106783239*, HDLBP                                                        |
|                           |           |                         |    | - | 6  | 73076296 |                                                                            | LOC100051018, LOC100057893, LOC100057392,<br>LOC100057471, LOC100057512, LOC100057630,<br>LOC100146966            |
|                           |           |                         |    | - | 16 | 29380920 |                                                                            |                                                                                                                   |
|                           |           |                         |    | - | 23 | 13420227 |                                                                            | PSAT1, CEP78,<br>LOC100063011,<br>LOC102148975*                                                                   |
|                           |           |                         |    | - | 23 | 14986689 |                                                                            | PRUNE2, GCNT1, RFK                                                                                                |
|                           |           |                         |    | - | 23 | 16892410 |                                                                            | -                                                                                                                 |
|                           |           |                         |    | - | 23 | 16892719 |                                                                            | -                                                                                                                 |
|                           |           |                         |    | - | 23 | 17961772 |                                                                            | TRPM6, LOC100146487*                                                                                              |
|                           |           |                         |    | - | 23 | 17982265 |                                                                            | -                                                                                                                 |
|                           |           |                         |    | - | 23 | 17985802 |                                                                            | -                                                                                                                 |
|                           |           |                         |    | - | 23 | 23143405 |                                                                            | DMRT2                                                                                                             |
|                           |           |                         |    | - | 23 | 23443921 |                                                                            | -                                                                                                                 |
|                           |           |                         |    | - | 23 | 23494785 |                                                                            | -                                                                                                                 |
|                           |           |                         |    | - | 23 | 23597542 |                                                                            |                                                                                                                   |
|                           |           |                         |    |   | 26 | 18598541 |                                                                            |                                                                                                                   |
|                           |           |                         |    |   | 29 | 17178229 |                                                                            | NSUN6, CACNB2                                                                                                     |
|                           |           |                         |    |   | 29 | 20239175 |                                                                            | SUV39H2, HSPA14,<br>LOC106782741*, CDNF,<br>FAM107B                                                               |

---

\*ncRNA gene type; \*\*pseudo-gene; \*\*\*Positions given from EquCab 2.0 according to the cited articles, \*since the article identified significant windows, candidate genes were identified within each window.
