# Supplementary material for: Identification and Functional Annotation of Genes Related to Horses’ Performance: From GWAS to Post-GWAS
Source: MDPI journal article supplement (doi:10.3390/ani10071173), 2020-07-10
Supplement: s1 [file s1]

## ;TFM Explorer

;Date : Wed May 13 06:26:21 2020  
 ;Scanned location : -3000:300  
 ;Scanned sequences : None (8 sequences)  
 ;Scanned matrices : (130 matrices)  
 ;Parameters : minsize= 30, maxsize= 1500, ratio=3.0, top=25

## ; headers

|     |          |                                            |
|-----|----------|--------------------------------------------|
| ; 1 | rank     | window rank                                |
| ; 2 | matrix   | matrix name                                |
| ; 3 | tf       | transcription factor name                  |
| ; 4 | info     | information of content of the matrix       |
| ; 5 | gc       | gc content of the matrix (G+C)%            |
| ; 6 | location | location of the window (relatively to TSS) |
| ; 7 | pvalue   | pvalue of the window                       |

1 MA0003.1 TFAP2A 7.8120920509 0.800000024164 -1678:-640  
 1.78361128641e-05

## list of hits

|         |       |       |   |      |           |
|---------|-------|-------|---|------|-----------|
| GRM8    | -1676 | -1667 | - | 6.51 | GCTCCAGGC |
| GRM8    | -1297 | -1288 | + | 7.05 | GCCCTAGGG |
| GRM8    | -0970 | -961  | - | 6.86 | CCCTCAGGC |
| GRM8    | -0901 | -892  | - | 6.51 | GCTCCCGGC |
| GRM8    | -0882 | -873  | + | 7.04 | GCCTGGGGC |
| GRM8    | -0796 | -787  | - | 6.37 | GCGCCGGGC |
| GRM8    | -0698 | -689  | + | 6.39 | GCCCGGCGG |
| GRIK2   | -1002 | -993  | + | 6.02 | GCCGCCAGC |
| GRIK2   | -0892 | -883  | + | 6.03 | GCCGCCAGG |
| NEB     | -1678 | -1669 | + | 6.31 | GCCTGAAGC |
| CCDC148 | -1453 | -1444 | + | 7.06 | GCCCCGCGC |
| CCDC148 | -1406 | -1397 | + | 6.87 | GCCCCGAGC |
| CCDC148 | -1265 | -1256 | - | 6.57 | CCCGGCGGC |
| CCDC148 | -1158 | -1149 | - | 6.94 | GCTCCGGGC |
| CCDC148 | -0955 | -946  | + | 6.95 | GCCCCGAGG |
| CCDC148 | -0930 | -921  | + | 7.42 | GCCCCGGGG |
| CCDC148 | -0913 | -904  | - | 6.31 | GCGCGGGGC |
| CCDC148 | -0826 | -817  | - | 6.45 | GCTGGGGGC |
| CCDC148 | -0708 | -699  | + | 7.06 | GCCGGGGGG |
| CCDC148 | -0640 | -631  | + | 6.45 | GCCGCGAGG |
| ANK1    | -1175 | -1166 | + | 6.52 | GCCGGGAGG |
| ANK1    | -1074 | -1065 | + | 6.28 | GCCCTCAGC |
| ANK1    | -0704 | -695  | - | 6.99 | CCCCGAGGC |
| KAT6A   | -1522 | -1513 | - | 6.70 | GCTCAGGGC |
| KAT6A   | -1470 | -1461 | - | 6.70 | GCTCAGGGC |
| KAT6A   | -1003 | -994  | + | 6.26 | GCCTCAAGG |
| KAT6A   | -0663 | -654  | + | 6.31 | GCCCCGCGC |

2 MA0139.1 CTCF 17.2051081365 0.644893727864 -852:-443  
 1.83288295322e-05

## list of hits

|         |       |      |   |      |                      |
|---------|-------|------|---|------|----------------------|
| GRM8    | -0852 | -833 | + | 9.09 | CCGCCTCTAGATGGAACTT  |
| GRM8    | -0690 | -671 | - | 3.63 | GCTCTCCATCGGCTGGAGG  |
| GRM8    | -0576 | -557 | - | 8.36 | CCGCGCCCCCTTCTGCGCA  |
| MIR592  | -0841 | -822 | + | 5.15 | GTTCCTCAAGGTGACAGTT  |
| GRIK2   | -0584 | -565 | + | 5.92 | TGCACAGCGGGTGGTGGTG  |
| GRIK2   | -0519 | -500 | + | 5.02 | ACGCCAGTAGGTGGACTAA  |
| NEB     | -0784 | -765 | - | 3.98 | CATTATCTTCTCCTGGTAA  |
| NEB     | -0725 | -706 | - | 4.35 | TTGAACCCTCTTGTGCCTG  |
| NEB     | -0528 | -509 | - | 3.79 | TAATTACACCCTGTGGATA  |
| RIF1    | -0450 | -431 | + | 4.07 | TCACCTAAAGTAGGCACTA  |
| CCDC148 | -0642 | -623 | + | 4.52 | CGGCCGCGAGGCGGTGGGG  |
| CCDC148 | -0591 | -572 | - | 5.56 | CGGCGCCCCCTCGCAGGCAG |
| ANK1    | -0555 | -536 | + | 3.60 | CGAGCGGCGGGGGGAACAG  |
| ANK1    | -0498 | -479 | - | 7.38 | CGGCGCCCCCGGCCGACC   |
| ANK1    | -0443 | -424 | + | 8.93 | CCGCCGCCCCGGGGGCGCCC |
| KAT6A   | -0635 | -616 | + | 4.29 | CCTACAGCAGGGGTGAGCA  |
| KAT6A   | -0447 | -428 | - | 3.48 | AAACGCCATCAAGAGTTCA  |

|   |              |       |               |       |          |                   |
|---|--------------|-------|---------------|-------|----------|-------------------|
| 3 | MA0024.1     | E2F1  | 13.8381257118 | 0.625 | -830:288 | 3.69804597541e-05 |
|   | list of hits |       |               |       |          |                   |
|   | GRM8         | -0415 | -407          | -     | 8.82     | GCGGCCAAA         |
|   | GRM8         | +0134 | 142           | +     | 4.20     | GTGGGCGC          |
|   | GRM8         | +0288 | 296           | +     | 4.20     | CTGGGCGC          |
|   | MIR592       | -0360 | -352          | -     | 4.20     | GAGCCAAA          |
|   | GRIK2        | -0830 | -822          | +     | 4.20     | TTCGGCGC          |
|   | GRIK2        | -0733 | -725          | -     | 10.19    | GCGCCAAA          |
|   | GRIK2        | -0542 | -534          | +     | 8.41     | TTTCCCGC          |
|   | GRIK2        | -0210 | -202          | +     | 3.80     | TCTCGCGC          |
|   | GRIK2        | -0202 | -194          | +     | 3.80     | TTTCGCTC          |
|   | NEB          | +0177 | 185           | +     | 4.20     | TTTGGGGC          |
|   | RIF1         | -0072 | -64           | +     | 4.20     | TTCGGCGC          |
|   | RIF1         | +0180 | 188           | -     | 3.80     | GCGCGAAC          |
|   | RIF1         | +0286 | 294           | -     | 6.24     | CCGGGAAA          |
|   | CCDC148      | -0745 | -737          | -     | 6.24     | CCGGGAAA          |
|   | CCDC148      | -0012 | -4            | -     | 3.80     | GAGCGAAA          |
|   | CCDC148      | +0040 | 48            | +     | 4.20     | TTGGGCGC          |
|   | CCDC148      | +0166 | 174           | -     | 4.42     | GCGTCAAA          |
|   | ANK1         | -0532 | -524          | +     | 6.24     | TTTCCCGG          |
|   | KAT6A        | -0325 | -317          | +     | 6.24     | TTTCCCGG          |
|   | KAT6A        | -0159 | -151          | +     | 6.24     | TTTCCCGG          |
|   | KAT6A        | +0058 | 66            | +     | 4.20     | TTTGGGGC          |

4 MA0158.1 HOXA5 8.75888972496 0.319270834327 -2508:-2167  
4.30556116033e-05

| list of hits |       |       |   |      |          |
|--------------|-------|-------|---|------|----------|
| GRM8         | -2167 | -2159 | - | 7.09 | CATTACTG |
| MIR592       | -2403 | -2395 | + | 7.02 | CACAAATG |
| MIR592       | -2389 | -2381 | - | 6.87 | AATTTGAG |
| MIR592       | -2191 | -2183 | - | 7.09 | AATTTCTG |
| NEB          | -2342 | -2334 | - | 6.54 | CATTACAG |
| RIF1         | -2303 | -2295 | - | 6.94 | AATTAACG |
| CCDC148      | -2467 | -2459 | + | 6.69 | CAGAAATG |
| CCDC148      | -2335 | -2327 | - | 6.72 | AATTAAAG |
| CCDC148      | -2295 | -2287 | - | 7.09 | CATTACTG |
| KAT6A        | -2508 | -2500 | + | 7.09 | CAGTAATG |
| KAT6A        | -2340 | -2332 | + | 7.42 | CACAAATT |

|   |              |        |              |                |         |                   |
|---|--------------|--------|--------------|----------------|---------|-------------------|
| 5 | MA0003.1     | TFAP2A | 7.8120920509 | 0.800000024164 | 121:262 | 4.71030171077e-05 |
|   | list of hits |        |              |                |         |                   |
|   | GRM8         | +0205  | 214          | +              | 6.98    | GCCGCGGGC         |
|   | GRM8         | +0229  | 238          | +              | 5.88    | GCCGCGCGC         |
|   | GRM8         | +0253  | 262          | +              | 5.81    | GCCGGTGGG         |
|   | GRIK2        | +0126  | 135          | -              | 7.06    | CCCCCGGC          |
|   | GRIK2        | +0143  | 152          | -              | 6.51    | GCTCCCGGC         |
|   | GRIK2        | +0262  | 271          | -              | 6.87    | GCTCGGGGC         |
|   | RIF1         | +0213  | 222          | -              | 6.45    | CCTCGCGGC         |
|   | RIF1         | +0250  | 259          | +              | 5.90    | GCCCCCGG          |
|   | CCDC148      | +0258  | 267          | -              | 6.79    | CCCTGAGGC         |
|   | ANK1         | +0121  | 130          | -              | 5.96    | GCGGCGGGC         |
|   | ANK1         | +0133  | 142          | +              | 5.79    | GCCCAGAGC         |
|   | ANK1         | +0144  | 153          | -              | 5.52    | GTCCCGGGC         |
|   | ANK1         | +0198  | 207          | -              | 6.32    | CCGCGGGGC         |
|   | ANK1         | +0223  | 232          | +              | 5.72    | GCCCTCCGC         |
|   | KAT6A        | +0124  | 133          | +              | 5.91    | GCCGAGGGG         |
|   | KAT6A        | +0135  | 144          | +              | 6.99    | GCCCCCGGC         |
|   | KAT6A        | +0145  | 154          | +              | 7.41    | GCCCCGGGC         |
|   | KAT6A        | +0160  | 169          | +              | 7.28    | GCCCGAGGC         |
|   | KAT6A        | +0175  | 184          | +              | 7.42    | GCCCCGGGG         |
|   | KAT6A        | +0195  | 204          | +              | 5.89    | GCCTCGCGG         |
|   | KAT6A        | +0257  | 266          | -              | 5.94    | GCGCCAGGC         |

6 MA0092.1 Hand1::Tcf2a 10.1435823018 0.506896541268 -2108:-2072  
7.15140387838e-05

|              |       |       |   |      |            |
|--------------|-------|-------|---|------|------------|
| list of hits |       |       |   |      |            |
| GRM8         | -2072 | -2062 | - | 5.88 | CTTGCAGACC |
| CCDC148      | -2108 | -2098 | - | 7.04 | GTACCAGACA |
| ANK1         | -2096 | -2086 | + | 5.84 | GAGCTGGAAT |

|       |       |       |   |      |            |
|-------|-------|-------|---|------|------------|
| ANK1  | -2086 | -2076 | - | 7.26 | TAGCCAGACT |
| KAT6A | -2074 | -2064 | + | 5.85 | TTTCTGGATC |
