# Supplementary material for: Identification and Functional Annotation of Genes Related to Horses’ Performance: From GWAS to Post-GWAS
Source: MDPI journal article supplement (doi:10.3390/ani10071173), 2020-07-10
Supplement: s1 [file s1]

## ;TFM Explorer

;Date : Wed May 13 06:37:55 2020  
 ;Scanned location : -2129:0  
 ;Scanned sequences : None (31 sequences)  
 ;Scanned matrices : (130 matrices)  
 ;Parameters : minsize= 30, maxsize= 1500, ratio=3.0, top=25

;

## ; headers

|     |          |                                            |
|-----|----------|--------------------------------------------|
| ; 1 | rank     | window rank                                |
| ; 2 | matrix   | matrix name                                |
| ; 3 | tf       | transcription factor name                  |
| ; 4 | info     | information of content of the matrix       |
| ; 5 | gc       | gc content of the matrix (G+C)%            |
| ; 6 | location | location of the window (relatively to TSS) |
| ; 7 | pvalue   | pvalue of the window                       |

1 MA0442.1 SOX10 7.96992529398 0.386363640428 -1548:-1456  
 1.14805732134e-05

## list of hits

|              |       |       |   |      |        |
|--------------|-------|-------|---|------|--------|
| SUV39H2      | -1542 | -1536 | - | 6.89 | ACAAAG |
| HSPA14       | -1531 | -1525 | + | 6.67 | CATTGT |
| CDNF         | -1456 | -1450 | - | 6.89 | ACAAAG |
| FAM107B      | -1548 | -1542 | + | 6.67 | CATTGT |
| FAM107B      | -1526 | -1520 | - | 6.67 | ACAATG |
| NSUN6        | -1546 | -1540 | + | 6.67 | CATTGT |
| NSUN6        | -1460 | -1454 | + | 6.89 | CTTTGT |
| DMRT2        | -1460 | -1454 | + | 6.89 | CTTTGT |
| GCNT1        | -1501 | -1495 | - | 6.89 | ACAAAG |
| CEP78        | -1548 | -1542 | + | 6.89 | CTTTGT |
| LOC100146966 | -1527 | -1521 | + | 6.89 | CTTTGT |
| MTERF4       | -1491 | -1485 | - | 6.89 | ACAAAG |
| TRPV6        | -1488 | -1482 | + | 6.89 | CTTTGT |
| LOC100054240 | -1505 | -1499 | - | 6.89 | ACAAAG |
| LOC100054240 | -1463 | -1457 | - | 6.89 | ACAAAG |

2 MA0003.1 TFAP2A 7.8120920509 0.800000024164 -1341:-1078  
 1.8763783038e-05

## list of hits

|              |       |       |   |      |           |
|--------------|-------|-------|---|------|-----------|
| CDNF         | -1341 | -1332 | - | 6.52 | CCTCCCGGC |
| CDNF         | -1305 | -1296 | - | 6.52 | CCTCCCGGC |
| CDNF         | -1269 | -1260 | - | 6.52 | CCTCCCGGC |
| CDNF         | -1233 | -1224 | - | 6.52 | CCTCCAGGC |
| CDNF         | -1197 | -1188 | - | 6.52 | CCTCCCGGC |
| CDNF         | -1161 | -1152 | - | 6.52 | CCTCCCGGC |
| CDNF         | -1125 | -1116 | - | 6.52 | CCTCCCGGC |
| CDNF         | -1089 | -1080 | - | 6.52 | CCTCCCGGC |
| GCNT1        | -1156 | -1147 | + | 6.70 | GCCCTGAGC |
| GCNT1        | -1107 | -1098 | + | 6.70 | GCCCTGAGC |
| PSAT1        | -1130 | -1121 | + | 6.14 | GCCCTGCGC |
| PSAT1        | -1101 | -1092 | - | 7.49 | CCCCGGGC  |
| CEP78        | -1279 | -1270 | - | 6.61 | GCCTAAGGC |
| LOC100057893 | -1295 | -1286 | + | 6.32 | GCCAGGGGC |
| HDLBP        | -1336 | -1327 | + | 6.19 | GCCCGACGG |
| HDLBP        | -1271 | -1262 | + | 7.28 | GCCCGAGGC |
| ANO7         | -1141 | -1132 | + | 6.09 | GCCTGCAGC |
| ANO7         | -1084 | -1075 | + | 7.25 | GCCCTGGGG |
| PASK         | -1311 | -1302 | - | 6.39 | CCGCCGGGC |
| PASK         | -1290 | -1281 | + | 6.32 | GCCCGCGCG |
| PASK         | -1187 | -1178 | + | 6.78 | GCCTCAGGC |
| SNED1        | -1290 | -1281 | - | 7.06 | CCCCAGGC  |
| SNED1        | -1233 | -1224 | + | 6.31 | GCCGGAAGC |
| SNED1        | -1182 | -1173 | - | 6.12 | GCCTCTGGC |
| LOC100055297 | -1078 | -1069 | + | 6.32 | GCCAGGGGC |

3 MA0060.1 NFYA 12.9251246242 0.522629311625 -359:-302  
 2.27249942999e-05

## list of hits

|        |       |      |   |       |                  |
|--------|-------|------|---|-------|------------------|
| HSPA14 | -0355 | -339 | - | 10.70 | ACGCTGATTGGTGGCG |
|--------|-------|------|---|-------|------------------|

|              |       |      |   |       |                  |
|--------------|-------|------|---|-------|------------------|
| CDNF         | -0359 | -343 | + | 6.92  | GAGAGCCAATAGAAAC |
| PSAT1        | -0354 | -338 | + | 11.57 | GCGAACCAATCAGCGC |
| PSAT1        | -0323 | -307 | + | 8.87  | TCGGGCCAATGGGGAC |
| LOC100051018 | -0345 | -329 | - | 5.22  | TCTCCCATAGGTCTGG |
| ANO7         | -0330 | -314 | + | 5.25  | CTAAGCAAATAAGAGG |
| ANO7         | -0302 | -286 | - | 4.92  | CGTGTCATTTGCTGGG |
| PASK         | -0356 | -340 | - | 6.90  | GGCACCATTGGTTGGC |
| PASK         | -0310 | -294 | - | 9.57  | TCTGCGATTGGTCAGT |
| TRPV6        | -0339 | -323 | - | 9.33  | GTGCTTATTGGCCATT |

4 MA0074.1 RXRA::VDR 20.4511670022 0.526666664581 -2001:-1940  
2.72591395021e-05

## list of hits

|              |       |       |   |      |                  |
|--------------|-------|-------|---|------|------------------|
| CDNF         | -1961 | -1946 | - | 1.48 | GTAACTCGGTCACCT  |
| GCNT1        | -1996 | -1981 | - | 1.37 | GGAGCTCATTGAGCT  |
| LOC100146966 | -2001 | -1986 | - | 0.59 | TGGACTTTTTCACACC |
| HDLBP        | -1940 | -1925 | + | 2.07 | GGGTGACGAGATTCA  |
| ANO7         | -1952 | -1937 | + | 3.59 | AGGGCAAGGAGTATG  |
| PPP1R7       | -1956 | -1941 | - | 0.59 | TGAACCTCTGGAAGC  |
| MTERF4       | -1989 | -1974 | - | 1.28 | TAATCTTATCAACCT  |
| TRPV6        | -1980 | -1965 | - | 0.32 | TGTTACTGTTGACCT  |
| EPHB6        | -1950 | -1935 | - | 3.45 | TGAATTCTGTGAGCC  |

5 MA0076.1 ELK4 14.1232301212 0.583333336645 -293:-245  
5.4861266417e-05

## list of hits

|              |       |      |   |      |           |
|--------------|-------|------|---|------|-----------|
| SUV39H2      | -0284 | -275 | - | 4.71 | GCCTCCGGT |
| NSUN6        | -0293 | -284 | + | 9.19 | GCCGGAAGT |
| NSUN6        | -0277 | -268 | + | 8.42 | GCCGGAAGC |
| DMRT2        | -0278 | -269 | - | 5.25 | ACTTCGGGT |
| LOC100057471 | -0248 | -239 | - | 3.94 | ATTTCCAGT |
| MTERF4       | -0274 | -265 | + | 9.19 | GCCGGAAGT |
| MTERF4       | -0245 | -236 | - | 7.11 | GTTTCCGGC |
| LOC100055297 | -0253 | -244 | - | 5.25 | ACTTCTGGT |

6 MA0051.1 IRF2 21.1344204686 0.412037036209 -1210:-1082  
6.37114769633e-05

## list of hits

|              |       |       |   |       |                     |
|--------------|-------|-------|---|-------|---------------------|
| HSPA14       | -1187 | -1169 | - | 6.24  | TCTCAGGTTTTATTTTCC  |
| PRUNE2       | -1195 | -1177 | + | 0.03  | TGTAAGAGAAAGCCTGAG  |
| RFK          | -1205 | -1187 | + | -0.99 | GGGAAATAAAAGTCTGGC  |
| RFK          | -1098 | -1080 | + | 3.43  | GGAAAGTGACTGCAAAGT  |
| CEP78        | -1140 | -1122 | - | 2.66  | CTTAGCTTTTCGATTTCC  |
| LOC100051018 | -1210 | -1192 | - | 0.63  | ATTTAAATTTTCATTTTAA |
| LOC100051018 | -1187 | -1169 | + | 0.30  | GAAAAATTAACCTTACT   |
| LOC100051018 | -1152 | -1134 | + | -0.91 | GAATAAAGAAATTAACCT  |
| LOC100057392 | -1161 | -1143 | + | 1.02  | AGAATATGAACTGTAGA   |
| LOC100057392 | -1128 | -1110 | - | 1.67  | GCAAGGTTTTCACCTGTCA |
| LOC100057392 | -1103 | -1085 | + | 2.67  | CTAAAAGGAACTAATTA   |
| LOC100057512 | -1157 | -1139 | + | 2.11  | TTAAAGTTAACTGAATA   |
| LOC100057512 | -1093 | -1075 | + | -0.94 | TAAAAACATAACGAAAAA  |
| LOC100057630 | -1082 | -1064 | - | 1.52  | AATTTGGTTTCCTTAGCC  |
| LOC100146966 | -1168 | -1150 | + | 6.48  | TGTAAGTGAAAGTAGAAG  |
| PPP1R7       | -1142 | -1124 | + | 1.91  | GGAAAAGGAAAACCGATG  |
| TRPV6        | -1207 | -1189 | + | 2.65  | CATAAGTGAAATCATACA  |

7 MA0033.1 FOXL1 6.06853667575 0.244565224052 -2047:-1958  
6.64326017366e-05

## list of hits

|         |       |       |   |      |          |
|---------|-------|-------|---|------|----------|
| SUV39H2 | -2039 | -2031 | + | 5.34 | TAAGCATA |
| SUV39H2 | -2024 | -2016 | - | 5.24 | TATTTTAA |
| HSPA14  | -2043 | -2035 | + | 5.43 | GATATATA |
| NSUN6   | -2047 | -2039 | - | 6.44 | TATGTAAA |
| NSUN6   | -1965 | -1957 | - | 6.15 | TATGTTAA |
| CACNB2  | -2021 | -2013 | + | 5.53 | TTTAAATA |
| CACNB2  | -1971 | -1963 | + | 6.15 | TAGATATA |
| TRPM6   | -2047 | -2039 | - | 6.51 | TATGTCTA |
| TRPM6   | -1968 | -1960 | + | 5.43 | ACTACATA |
| PRUNE2  | -2030 | -2022 | + | 5.60 | TAAAAATA |

|              |       |       |       |      |               |
|--------------|-------|-------|-------|------|---------------|
| GCNT1        | -2007 | -1999 | +     | 6.44 | TTTACATA      |
| LOC100051018 |       | -1958 | -1950 | +    | 5.43 AATAAATA |
| LOC100057893 |       | -2045 | -2037 | +    | 5.35 ATGATATA |
| LOC100057893 |       | -1991 | -1983 | +    | 5.88 TATAAATA |
| LOC100057893 |       | -1979 | -1971 | +    | 5.60 TAAAAATA |
| LOC100057471 |       | -2002 | -1994 | +    | 5.53 TTTAAATA |
| LOC100057471 |       | -1989 | -1981 | -    | 5.53 TATTTAAA |
| LOC100057512 |       | -1997 | -1989 | +    | 5.27 TATGTATA |
| LOC100057630 |       | -1994 | -1986 | -    | 5.35 TATATTAT |
| PASK         | -1958 | -1950 | +     | 6.06 | AAAACATA      |
| MTERF4       | -2035 | -2027 | +     | 6.15 | TTGACATA      |
| MTERF4       | -2020 | -2012 | -     | 5.35 | TATATTAT      |
| SNED1        | -2016 | -2008 | +     | 5.47 | TACATATA      |

8 MA0162.1 Egr1 14.4555832005 0.739393945445 -890:-674  
7.68849943963e-05

list of hits

|              |       |       |      |       |                  |
|--------------|-------|-------|------|-------|------------------|
| CDNF         | -0820 | -809  | +    | 4.87  | CCCGTAGGTGA      |
| CDNF         | -0794 | -783  | -    | 6.68  | CCGCCCCCAGA      |
| CDNF         | -0729 | -718  | -    | 6.37  | ACGGCCACGCA      |
| FAM107B      | -0713 | -702  | +    | 4.69  | CGCGTGTGTGT      |
| CACNB2       | -0864 | -853  | -    | 3.85  | CCTCCCCCATC      |
| CACNB2       | -0674 | -663  | -    | 6.58  | GCGCCCACGCG      |
| PRUNE2       | -0762 | -751  | -    | 6.02  | CCACCCCCACC      |
| RFK          | -0694 | -683  | +    | 5.09  | TCTGGGGGAGG      |
| PSAT1        | -0881 | -870  | -    | 5.44  | CCGCCTACATC      |
| PSAT1        | -0816 | -805  | -    | 3.94  | CCACCTACCCA      |
| CEP78        | -0861 | -850  | +    | 7.48  | TGCGTAGGAGA      |
| CEP78        | -0735 | -724  | +    | 7.76  | CCCGTGGGAGG      |
| LOC100057471 |       | -0845 | -834 | -     | 7.10 ACACCTACACT |
| HDLBP        | -0890 | -879  | +    | 6.64  | AGCGGGGGAGA      |
| HDLBP        | -0807 | -796  | +    | 4.03  | AGCGGGAGAGA      |
| HDLBP        | -0765 | -754  | +    | 4.15  | AGCGGGGACGG      |
| HDLBP        | -0682 | -671  | -    | 5.62  | CCTCCCCCACC      |
| PASK         | -0744 | -733  | -    | 6.99  | CCGCCTCCGTT      |
| SNED1        | -0797 | -786  | -    | 7.48  | CCTCCCCCGCC      |
| SNED1        | -0736 | -725  | -    | 10.43 | CCGCCCCCGCG      |
| SNED1        | -0696 | -685  | +    | 7.98  | CCCGGGGGCGG      |
| EPHB6        | -0839 | -828  | -    | 3.90  | ACGCCACCTT       |

9 MA0140.1 Tal1::Gata1 11.2966184617 0.45067769915 -264:-225  
9.10647129407e-05

list of hits

|              |       |      |   |      |                    |
|--------------|-------|------|---|------|--------------------|
| LOC100051018 | -0264 | -246 | + | 5.95 | CTGGGACTGTCAGATGAC |
| LOC100057392 | -0264 | -246 | + | 6.44 | CTGGGACTGACAGATGAC |
| LOC100057392 | -0225 | -207 | - | 5.34 | TTTATCTTCTATTTCTT  |
| LOC100057471 | -0264 | -246 | + | 6.36 | CTGGGACTGACGGATAAT |
| LOC100057512 | -0264 | -246 | + | 6.44 | CTGGGACTGACAGATGAC |
| LOC100057512 | -0225 | -207 | - | 5.77 | TTTATCTTCTATTTCTC  |
| LOC100057630 | -0264 | -246 | + | 5.95 | CTGGGACTGTCAGATGAC |
