# Supplementary material for: Identification and Functional Annotation of Genes Related to Horses’ Performance: From GWAS to Post-GWAS
Source: MDPI journal article supplement (doi:10.3390/ani10071173), 2020-07-10
Supplement: s1 [file s1]

```
;TFM Explorer
;Date           : Wed May 13 06:35:17 2020
;Scanned location : -3280:0
;Scanned sequences : None (193 sequences)
;Scanned matrices : (130 matrices)
;Parameters      : minsize= 30, maxsize= 1500, ratio=3.0, top=25
;
; headers
;   1   rank           window rank
;   2   matrix         matrix name
;   3   tf             transcription factor name
;   4   info           information of content of the matrix
;   5   gc             gc content of the matrix (G+C)%
;   6   location       location of the window (relatively to TSS)
;   7   pvalue         pvalue of the window
```

```
1   MA0003.1          TFAP2A  7.8120920509    0.800000024164  -437:-278
1.36515551547e-29
```

## list of hits

|              |       |      |   |      |            |
|--------------|-------|------|---|------|------------|
| DUSP5        | -0416 | -407 | - | 5.96 | CCGCCCCGGC |
| DUSP5        | -0392 | -383 | - | 7.00 | CCCGGGGGGC |
| DUSP5        | -0374 | -365 | + | 6.75 | GCCCCGAAGG |
| XP.PEP1      | -0378 | -369 | + | 6.31 | GCCCCGCGC  |
| SMC3         | -0402 | -393 | + | 6.45 | GCCGCGAGG  |
| SMC3         | -0322 | -313 | + | 6.01 | GCCCTTGCGG |
| SMC3         | -0285 | -276 | + | 6.15 | GCCCTGCGG  |
| RBM20        | -0402 | -393 | + | 6.63 | GCCGGCGGC  |
| RBM20        | -0345 | -336 | - | 5.94 | GCGCCCCGGC |
| RBM20        | -0329 | -320 | - | 6.29 | CCTGAGGGC  |
| ADK          | -0341 | -332 | + | 6.32 | GCCAGGGGC  |
| KAT6B        | -0329 | -320 | + | 6.39 | GCCGTCGGC  |
| SAMD8        | -0316 | -307 | - | 6.28 | CCTCAAGGC  |
| COMTD1       | -0373 | -364 | + | 5.97 | GCCCCGCCG  |
| VDAC2        | -0394 | -385 | - | 7.00 | CCCGGGGGGC |
| VDAC2        | -0301 | -292 | + | 6.01 | GCCCCGGGT  |
| DUPD1        | -0423 | -414 | + | 5.91 | GCCAGCGGG  |
| LOC100068320 | -0430 | -421 | + | 6.16 | GCCCCTGGC  |
| KLHL2        | -0335 | -326 | + | 6.99 | GCCGCGGGG  |
| CPE          | -0417 | -408 | + | 5.94 | GCCGGGCGC  |
| CPE          | -0375 | -366 | - | 6.34 | CCCCTGGGC  |
| CPE          | -0348 | -339 | + | 5.97 | GCCCCGCCG  |
| LOC106780946 | -0433 | -424 | - | 6.64 | CCCGCCGGC  |
| LOC106780946 | -0396 | -387 | - | 6.37 | GCGCCGGGC  |
| LOC106780946 | -0369 | -360 | + | 7.06 | GCCCCGCGC  |
| LOC106780946 | -0345 | -336 | - | 6.87 | GCTCGGGGC  |
| EPB41L3      | -0409 | -400 | + | 6.63 | GCCGGCGGC  |
| EPB41L3      | -0358 | -349 | - | 6.31 | GCGCGGGGC  |
| L3MBTL4      | -0434 | -425 | + | 6.70 | GCCCTGAGC  |
| L3MBTL4      | -0382 | -373 | + | 6.70 | GCCCTGAGC  |
| TMEM200C     | -0410 | -401 | + | 6.87 | GCCCCGAGC  |
| TMEM200C     | -0386 | -377 | + | 6.98 | GCCGCGGGC  |
| TMEM200C     | -0359 | -350 | + | 6.37 | GCCCCGCGC  |
| TMEM200C     | -0322 | -313 | + | 6.64 | GCCGGCGGG  |
| TMEM200C     | -0309 | -300 | + | 6.99 | GCCGCGGGG  |
| TMEM200C     | -0296 | -287 | + | 6.98 | GCCGCGGGC  |
| .R2E1        | -0330 | -321 | + | 6.13 | GCCAGAGGG  |
| FOXO3        | -0293 | -284 | + | 6.98 | GCCGCGGGC  |
| ARMC2        | -0366 | -357 | - | 6.10 | CCTGCCGGC  |
| SES.1        | -0410 | -401 | - | 5.94 | GCGCCCCGGC |
| CEP57L1      | -0393 | -384 | - | 6.86 | CCCTCCGGC  |
| CEP57L1      | -0360 | -351 | - | 5.88 | GCGCGCGGC  |
| CEP57L1      | -0280 | -271 | + | 7.06 | GCCTGGGGG  |
| OSTM1        | -0413 | -404 | - | 5.88 | GCGCGAGGC  |
| OSTM1        | -0391 | -382 | + | 5.97 | GCCCCGCCG  |
| OSTM1        | -0374 | -365 | - | 6.51 | GCTCCCGGC  |
| OSTM1        | -0348 | -339 | + | 5.88 | GCCGCGCGC  |
| OSTM1        | -0302 | -293 | - | 6.44 | GCTCGCGGC  |
| OSTM1        | -0279 | -270 | + | 6.31 | GCCGGAAGC  |

|          |       |       |      |      |           |            |
|----------|-------|-------|------|------|-----------|------------|
| PPIL6    | -0432 | -423  | -    | 6.05 | GCCTGTGGC |            |
| PPIL6    | -0376 | -367  | +    | 6.39 | GCCGTCGGC |            |
| PPIL6    | -0363 | -354  | -    | 6.33 | CCCCCTGGC |            |
| PPIL6    | -0339 | -330  | -    | 6.34 | CCCCTGGGC |            |
| PPIL6    | -0316 | -307  | -    | 6.99 | CCCCGCGGC |            |
| PPIL6    | -0278 | -269  | +    | 5.89 | GCCGCGCGG |            |
| SMPD2    | -0427 | -418  | +    | 6.99 | GCCGCGGGG |            |
| SMPD2    | -0404 | -395  | +    | 6.34 | GCCCAGGGG |            |
| SMPD2    | -0380 | -371  | +    | 6.33 | GCCAGGGGG |            |
| SMPD2    | -0367 | -358  | -    | 6.39 | GCCGACGGC |            |
| SMPD2    | -0311 | -302  | +    | 6.05 | GCCACAGGC |            |
| MICAL1   | -0437 | -428  | +    | 6.99 | GCCCCCGGC |            |
| MICAL1   | -0319 | -310  | +    | 5.94 | GCCGGGCGC |            |
| ZBTB24   | -0353 | -344  | +    | 7.04 | GCCGGGGGC |            |
| ZBTB24   | -0304 | -295  | -    | 6.51 | GCTCCCCGC |            |
| FIG4     | -0348 | -339  | -    | 6.69 | CCTTGGGGC |            |
| WASF1    | -0412 | -403  | -    | 6.52 | CCTCCCCGC |            |
| CDC40    | -0434 | -425  | +    | 6.52 | GCCGGGAGG |            |
| METTL24  | -0405 | -396  | +    | 6.18 | GCCCGACGC |            |
| METTL24  | -0388 | -379  | +    | 5.92 | GCCCACGGG |            |
| METTL24  | -0356 | -347  | +    | 6.39 | GCCCGGCGG |            |
| METTL24  | -0335 | -326  | -    | 6.09 | GCTGCCGGC |            |
| METTL24  | -0315 | -306  | +    | 7.41 | GCCCCGGGC |            |
| AK9      | -0315 | -306  | +    | 6.69 | GCCCCAAGG |            |
| SLC22A16 |       | -0413 | -404 | +    | 6.14      | GCCCTGCGC  |
| SLC22A16 |       | -0298 | -289 | +    | 6.52      | GCCCGCAGC  |
| SLC22A16 |       | -0284 | -275 | -    | 5.88      | GC GCGCGGC |
| RBFOX3   | -0362 | -353  | +    | 6.86 | GCCGGAGGG |            |
| E.GASE   | -0333 | -324  | +    | 6.45 | GCCCCCAGC |            |
| E.GASE   | -0292 | -283  | +    | 6.98 | GCCGCGGGC |            |
| C1QT.F1  | -0343 | -334  | +    | 5.97 | GCCCGCCGG |            |
| CA.T1    | -0436 | -427  | +    | 6.86 | GCCTGAGGG |            |
| CA.T1    | -0285 | -276  | +    | 6.51 | GCCGGGAGC |            |
| LGALS3BP |       | -0425 | -416 | +    | 6.81      | GCCTTGGGC  |
| LGALS3BP |       | -0372 | -363 | +    | 7.21      | GCCCCAGGC  |
| TIMP2    | -0383 | -374  | +    | 6.51 | GCCGGGAGC |            |
| TIMP2    | -0357 | -348  | +    | 6.02 | GCCGCCAGC |            |
| TIMP2    | -0291 | -282  | +    | 6.52 | GCCCGCAGC |            |
| CYTH1    | -0401 | -392  | +    | 7.06 | GCCTGGGGG |            |
| CYTH1    | -0319 | -310  | -    | 5.96 | GCGGCGGGC |            |
| CYTH1    | -0305 | -296  | +    | 6.32 | GCCCCGCGG |            |
| CYTH1    | -0286 | -277  | +    | 6.63 | GCCGGCGGC |            |
| SOCS3    | -0335 | -326  | +    | 6.56 | GCCGCCGGC |            |
| SOCS3    | -0290 | -281  | -    | 5.96 | CCGCCCCGC |            |
| SOCS3    | -0279 | -270  | +    | 6.34 | GCCCAGGGG |            |
| TMEM235  | -0384 | -375  | -    | 5.89 | CCGCGCGGC |            |
| AFMID    | -0281 | -272  | +    | 5.91 | GCCCACGGC |            |
| CA4      | -0338 | -329  | +    | 6.33 | GCCAGGGGG |            |
| Z.HIT3   | -0334 | -325  | +    | 5.88 | GCCGCGCGC |            |
| GG.BP2   | -0351 | -342  | -    | 5.96 | CCGCCCCGC |            |
| GG.BP2   | -0285 | -276  | -    | 6.26 | CCCCGTGGC |            |
| DHRS11   | -0405 | -396  | -    | 6.37 | GCGCCGGGC |            |
| DHRS11   | -0373 | -364  | +    | 6.32 | GCCAGGGGC |            |
| DHRS11   | -0331 | -322  | +    | 6.51 | GCCGGGAGC |            |
| DHRS11   | -0322 | -313  | -    | 6.11 | GCGTGGGGC |            |
| LHX1     | -0348 | -339  | -    | 5.91 | CCCCTCGGC |            |
| LHX1     | -0324 | -315  | -    | 7.06 | CCCCCAGGC |            |
| AATF     | -0282 | -273  | +    | 6.74 | GCCCGAAGC |            |
| ACACA    | -0405 | -396  | +    | 6.02 | GCCGCCAGC |            |
| ACACA    | -0383 | -374  | +    | 6.14 | GCCCAAGGG |            |
| ACACA    | -0322 | -313  | +    | 5.96 | GCCCGCCGC |            |
| ACACA    | -0310 | -301  | -    | 5.91 | CCCCTCGGC |            |
| USP32    | -0408 | -399  | +    | 6.52 | GCCGGGAGG |            |
| SPTB.1   | -0428 | -419  | +    | 6.31 | GCCCCGCGC |            |
| SPTB.1   | -0320 | -311  | +    | 6.31 | GCCCCGCGC |            |
| ACYP2    | -0326 | -317  | -    | 6.02 | GCTGGCGGC |            |
| PSME4    | -0391 | -382  | +    | 6.56 | GCCGCCGGC |            |
| PSME4    | -0381 | -372  | +    | 6.99 | GCCGCGGGG |            |
| GPR75    | -0292 | -283  | +    | 6.81 | GCCTTGGGC |            |

|            |       |      |   |      |           |
|------------|-------|------|---|------|-----------|
| C15H2orf73 | -0403 | -394 | + | 5.96 | GCCCGCCGC |
| C15H2orf73 | -0341 | -332 | - | 7.06 | CCCCCAGGC |
| C15H2orf73 | -0316 | -307 | - | 5.94 | GCGCCCGGC |
| KC.S3      | -0313 | -304 | - | 6.95 | CCTCCGGGC |
| GE.1       | -0331 | -322 | - | 6.57 | CCCGGAGGC |
| SMC6       | -0395 | -386 | - | 6.31 | GCTTCCGGC |
| SMC6       | -0327 | -318 | - | 5.97 | CCGGCGGGC |
| VS.L1      | -0279 | -270 | - | 6.02 | GCTGGAGGC |
| RDH14      | -0296 | -287 | + | 5.80 | GCCGGTGGC |
| .OL10      | -0377 | -368 | - | 6.52 | CCTCCCGGC |
| ODC1       | -0319 | -310 | - | 6.18 | GCGTCGGGC |
| ODC1       | -0284 | -275 | - | 5.96 | GCGGCGGGC |
| HPCAL1     | -0432 | -423 | + | 7.04 | GCCGGGGGC |
| HPCAL1     | -0415 | -406 | + | 7.06 | GCCTGGGGG |
| HPCAL1     | -0387 | -378 | + | 6.53 | GCCCCGAGG |
| HPCAL1     | -0358 | -349 | + | 5.88 | GCCGCGCGC |
| HPCAL1     | -0346 | -337 | + | 6.99 | GCCCCCGGC |
| HPCAL1     | -0333 | -324 | + | 6.57 | GCCTCCGGG |
| RRM2       | -0368 | -359 | - | 6.94 | GCTCCGGGC |
| RRM2       | -0356 | -347 | + | 5.97 | GCCCCGCCG |
| RRM2       | -0309 | -300 | - | 6.32 | CCGCGGGGC |
| RRM2       | -0288 | -279 | + | 5.75 | GCCGCTGGG |
| RRM2       | -0278 | -269 | + | 7.04 | GCCGGGGGC |
| KLF11      | -0434 | -425 | + | 6.09 | GCCGGCAGC |
| KLF11      | -0396 | -387 | - | 5.94 | GCGCCCGGC |
| KLF11      | -0339 | -330 | - | 6.99 | CCCCGCGGC |
| KLF11      | -0298 | -289 | + | 6.45 | GCCGCGAGG |
| GRHL1      | -0390 | -381 | - | 6.52 | CCTCCCGGC |
| GRHL1      | -0355 | -346 | + | 6.02 | GCCGCCAGC |
| TAF1B      | -0294 | -285 | - | 6.99 | CCCCGCGGC |
| ADAM17     | -0384 | -375 | + | 5.89 | GCCGCGCGG |
| ADAM17     | -0369 | -360 | - | 6.31 | GCTTCCGGC |
| ADAM17     | -0327 | -318 | + | 6.31 | GCCGGAAGC |
| CYS1       | -0378 | -369 | + | 6.99 | GCCCCCGGC |
| CYS1       | -0297 | -288 | + | 5.94 | GCCGGGCGC |
| RPS7       | -0345 | -336 | + | 6.32 | GCCCAGGGC |
| ADI1       | -0435 | -426 | + | 6.31 | GCCCCGCGC |
| ADI1       | -0402 | -393 | - | 6.87 | GCTCGGGGC |
| ADI1       | -0317 | -308 | + | 5.97 | GCCCCGCCG |
| TRAPPC12   | -0379 | -370 | - | 6.88 | CCTCGGGGC |
| TRAPPC12   | -0329 | -320 | - | 6.09 | GCTGCCGGC |
| PDZR.3     | -0421 | -412 | - | 6.52 | CCTCCCGGC |
| PPP4R2     | -0417 | -408 | - | 6.45 | CCTCGCGGC |
| PPP4R2     | -0369 | -360 | - | 5.88 | GCGCGCGGC |
| PPP4R2     | -0319 | -310 | + | 5.94 | GCCGGGCGC |
| GXYLT2     | -0404 | -395 | + | 5.97 | GCCCCGCCG |
| GXYLT2     | -0393 | -384 | + | 6.87 | GCCCCGAGC |
| GXYLT2     | -0348 | -339 | + | 5.88 | GCCGCGCGC |
| GXYLT2     | -0317 | -308 | - | 5.96 | CCGCCCCGC |
| GXYLT2     | -0280 | -271 | + | 7.49 | GCCCCGGGG |
| SHQ1       | -0336 | -327 | - | 6.11 | GCGTGGGGC |
| SHQ1       | -0289 | -280 | + | 6.31 | GCCGGAAGC |
| RYBP       | -0435 | -426 | - | 5.94 | GCGCCCCGC |
| RYBP       | -0317 | -308 | - | 6.28 | GCTGAGGGC |
| GXYLT2     | -0404 | -395 | + | 5.97 | GCCCCGCCG |
| GXYLT2     | -0393 | -384 | + | 6.87 | GCCCCGAGC |
| GXYLT2     | -0348 | -339 | + | 5.88 | GCCGCGCGC |
| GXYLT2     | -0317 | -308 | - | 5.96 | CCGCCCCGC |
| GXYLT2     | -0280 | -271 | + | 7.49 | GCCCCGGGG |
| PROK2      | -0408 | -399 | - | 6.31 | GCGCGGGGC |
| PROK2      | -0394 | -385 | - | 5.89 | GCGGGGGGC |
| PROK2      | -0371 | -362 | + | 7.28 | GCCCCAGGC |
| PROK2      | -0350 | -341 | + | 5.88 | GCCGCGCGC |
| PROK2      | -0313 | -304 | - | 5.90 | GCCGCTGGC |
| DIPK2A     | -0422 | -413 | + | 6.45 | GCCCCCAGC |
| DIPK2A     | -0388 | -379 | - | 5.88 | GCGCGCGGC |
| DIPK2A     | -0356 | -347 | + | 6.87 | GCCCCGAGC |
| TASP1      | -0333 | -324 | - | 6.31 | GCTTCCGGC |
| ISM1       | -0371 | -362 | + | 6.37 | GCCCCGCGC |

|              |       |      |   |      |            |
|--------------|-------|------|---|------|------------|
| ISM1         | -0341 | -332 | + | 6.15 | GCCCTGCGG  |
| LOC100034197 | -0364 | -355 | + | 7.22 | GCCCCAGGG  |
| LOC100056127 | -0338 | -329 | + | 7.42 | GCCCCGGGG  |
| SLC31A2      | -0418 | -409 | + | 6.32 | GCCCCGCGG  |
| SLC31A2      | -0357 | -348 | + | 7.21 | GCCCCAGGC  |
| PRPF4        | -0293 | -284 | + | 6.18 | GCCCCCTGGG |
| R.F183       | -0412 | -403 | + | 6.70 | GCCCTGAGC  |
| WDR31        | -0345 | -336 | + | 6.18 | GCCCCCTGGG |
| WDR31        | -0311 | -302 | + | 6.09 | GCCGGCAGC  |
| WDR31        | -0292 | -283 | + | 6.95 | GCCCCGAGG  |
| BSPRY        | -0334 | -325 | + | 6.64 | GCCGGGCGGG |
| BSPRY        | -0301 | -292 | + | 5.90 | GCCCCCCC   |
| HDHD3        | -0356 | -347 | - | 5.89 | GCGGGGGGC  |
| ALAD         | -0396 | -387 | + | 5.97 | GCCCCCGCG  |
| ALAD         | -0362 | -353 | + | 6.44 | GCCTCGAGC  |
| ALAD         | -0301 | -292 | + | 6.29 | GCCCTCAGG  |
| POLE3        | -0404 | -395 | - | 6.64 | CCCGCCGCG  |
| Z.F618       | -0437 | -428 | + | 7.04 | GCCGGGGGC  |
| Z.F618       | -0340 | -331 | + | 5.89 | GCCCCCCC   |
| Z.F618       | -0329 | -320 | + | 5.89 | GCCCCCCC   |
| Z.F618       | -0314 | -305 | + | 5.90 | GCCCCCCC   |
| AMBP         | -0326 | -317 | + | 6.82 | GCCTTGGGG  |
| COL27A1      | -0291 | -282 | + | 5.85 | GCCTTCAGC  |
| AK.A         | -0356 | -347 | + | 6.98 | GCCTCGGGC  |
| TEX48        | -0373 | -364 | - | 6.31 | GCTTCCGGC  |
| TEX48        | -0289 | -280 | + | 6.86 | GCCGGAGGG  |
| LOC100050034 | -0394 | -385 | + | 6.24 | GCCTCAAGC  |
| DCK          | -0431 | -422 | + | 7.24 | GCCCTGGGG  |
| DCK          | -0373 | -364 | - | 5.88 | GCGCGCGGC  |
| DCK          | -0353 | -344 | - | 5.89 | CCGCGCGGC  |
| DCK          | -0314 | -305 | + | 5.94 | GCCGGGCGC  |
| DCK          | -0290 | -281 | + | 6.74 | GCCCCGAAGC |
| MOB1B        | -0432 | -423 | - | 6.32 | CCGCGGGGC  |
| MOB1B        | -0373 | -364 | + | 6.86 | GCCGGAGGG  |
| MOB1B        | -0317 | -308 | - | 5.89 | GCGGGGGGC  |
| GRSF1        | -0428 | -419 | - | 6.08 | ACCCCGGGC  |
| GRSF1        | -0414 | -405 | + | 6.34 | GCCCAGGGG  |
| GRSF1        | -0400 | -391 | + | 7.41 | GCCCCGGGC  |
| GRSF1        | -0388 | -379 | + | 6.69 | GCCCCAAGG  |
| GRSF1        | -0337 | -328 | + | 5.89 | GCCTCGCGG  |
| GRSF1        | -0292 | -283 | - | 6.52 | CTTCCCGGC  |
| RUFY3        | -0426 | -417 | + | 6.34 | GCCCAGGGG  |
| RUFY3        | -0398 | -389 | + | 6.86 | GCCGGAGGG  |
| RUFY3        | -0322 | -313 | + | 6.78 | GCCGCAGGC  |
| RUFY3        | -0298 | -289 | + | 6.09 | GCCGGCAGC  |
| UTP3         | -0414 | -405 | + | 6.45 | GCCCCCAGC  |
| Z.F572       | -0285 | -276 | + | 6.57 | GCCTCCGGG  |
| SOLE         | -0380 | -371 | - | 6.02 | GCTGGCGGC  |
| SOLE         | -0352 | -343 | - | 6.31 | GCGCGGGGC  |
| WASHC5       | -0307 | -298 | + | 6.32 | GCCAGGGGC  |
| .SMCE2       | -0366 | -357 | + | 6.16 | GCCCCCTGGC |
| PLEKHH2      | -0284 | -275 | - | 5.79 | GCTCTGGGC  |
| ABCG8        | -0343 | -334 | - | 6.09 | CCCCATGGC  |
| ABCG8        | -0315 | -306 | - | 6.09 | CCCCATGGC  |
| ABCG8        | -0287 | -278 | - | 6.09 | CCCCATGGC  |
| LRPPRC       | -0342 | -333 | - | 5.94 | GCGCCCGGC  |
| LRPPRC       | -0319 | -310 | - | 6.37 | GCGCCGGGC  |
| PPM1B        | -0379 | -370 | + | 5.84 | GCCCTGGGT  |
| KLHL29       | -0427 | -418 | + | 7.47 | GCCCCGGGC  |
| KLHL29       | -0359 | -350 | + | 6.16 | GCCCCCTGGC |
| PLCB1        | -0400 | -391 | + | 6.57 | GCCGCCGGG  |
| PLCB1        | -0349 | -340 | + | 5.79 | GCCAGGAGG  |
| TMX4         | -0355 | -346 | - | 6.08 | ACCCCGGGC  |
| COX20        | -0431 | -422 | + | 7.47 | GCCCCGGGC  |
| COX20        | -0412 | -403 | + | 6.32 | GCCGGAAGG  |
| COX20        | -0386 | -377 | + | 7.21 | GCCCCAGGC  |
| COX20        | -0335 | -326 | + | 7.06 | GCCCCGCGC  |
| CATSPERE     | -0311 | -302 | + | 6.99 | GCCGCGGGG  |
| CATSPERE     | -0295 | -286 | - | 5.88 | GCGCGCGGC  |

|        |       |      |   |      |            |
|--------|-------|------|---|------|------------|
| ZBTB18 | -0424 | -415 | + | 6.99 | GCCCCCGGC  |
| ZBTB18 | -0343 | -334 | + | 6.09 | GCCATGGGG  |
| ZBTB18 | -0289 | -280 | + | 5.91 | GCCAGCGGG  |
| ADSS2  | -0395 | -386 | + | 6.99 | GCCGCGGGG  |
| ADSS2  | -0371 | -362 | - | 6.64 | CCCGCCGGC  |
| ADSS2  | -0348 | -339 | - | 6.53 | CCTGCGGGC  |
| ADSS2  | -0319 | -310 | - | 5.88 | GCGCGAGGC  |
| ADSS2  | -0280 | -271 | - | 6.31 | GCGCGGGGC  |
| DESI2  | -0419 | -410 | - | 6.79 | CCCTGCGGC  |
| H.R.PU | -0415 | -406 | + | 5.89 | GCCGCGCGG  |
| H.R.PU | -0398 | -389 | + | 6.37 | GCCCCGGCGC |
| H.R.PU | -0379 | -370 | + | 5.94 | GCCGGGCGC  |
| H.R.PU | -0364 | -355 | - | 6.51 | GCTCCCCGGC |

2 MA0162.1 Egr1 14.4555832005 0.739393945445 -503:-268  
9.58601738119e-24

|              |       |      |   |       |             |
|--------------|-------|------|---|-------|-------------|
| list of hits |       |      |   |       |             |
| DUSP5        | -0392 | -381 | + | 7.98  | CCCGGGGGCGT |
| ADD3         | -0366 | -355 | - | 4.55  | CCTCCCACAGC |
| XP.PEP1      | -0340 | -329 | + | 5.44  | GATGGGGGCGG |
| XP.PEP1      | -0298 | -287 | + | 4.46  | GGCGTGGCCGG |
| MXI1         | -0301 | -290 | - | 6.71  | ACACTCACACA |
| SMC3         | -0421 | -410 | - | 4.56  | CCCCCTACGCT |
| SMC3         | -0370 | -359 | - | 7.20  | CCGCCTCCACG |
| RBM20        | -0431 | -420 | - | 5.38  | CCGCTCCCGGG |
| RBM20        | -0278 | -267 | - | 4.51  | CCGCGCCCGCG |
| ADK          | -0412 | -401 | - | 4.25  | CCTCCTACAGT |
| ADK          | -0401 | -390 | + | 5.96  | CGGGTGGGCGG |
| ADK          | -0330 | -319 | + | 7.00  | TGTGTGGGAGA |
| COMTD1       | -0324 | -313 | - | 4.38  | CCGCCGCCGCT |
| VDAC2        | -0492 | -481 | - | 4.58  | CCGCCCCCTCG |
| VDAC2        | -0425 | -414 | - | 4.15  | CGCCCCCGCT  |
| VDAC2        | -0394 | -383 | + | 7.98  | CCCGGGGGCGG |
| LOC100061588 | -0471 | -460 | - | 5.32  | CCACCCACTCA |
| LOC100068208 | -0500 | -489 | + | 6.02  | GGTGGGGGTGG |
| MSMO1        | -0472 | -461 | - | 6.60  | CCGCCTCCGGG |
| KLHL2        | -0333 | -322 | + | 4.44  | CGCGGGGGCCG |
| TMEM192      | -0270 | -259 | + | 8.29  | AGTGGGGGCGG |
| APELA        | -0362 | -351 | + | 5.32  | AGTGGAGGAGG |
| APELA        | -0343 | -332 | + | 5.03  | GCCGGGGGAGG |
| LOC100066472 | -0377 | -366 | + | 5.62  | GGTGTAGGAGT |
| LOC100068041 | -0442 | -431 | + | 4.92  | TGAGTGGGAGG |
| LOC106780946 | -0478 | -467 | - | 4.38  | CCGCCGCCGCT |
| LOC106780946 | -0366 | -355 | + | 4.66  | CGCGGCGGCGG |
| EPB41L3      | -0473 | -462 | + | 4.58  | TGTGTGCGCGT |
| EPB41L3      | -0395 | -384 | + | 6.47  | GGCGGGAGCGG |
| EPB41L3      | -0366 | -355 | - | 4.44  | CCGCCCGCGG  |
| TMEM200C     | -0391 | -380 | - | 4.66  | CCGCCGCCGCG |
| TMEM200C     | -0279 | -268 | + | 4.38  | AGCGGCGGCGG |
| S.X3         | -0400 | -389 | - | 7.16  | CCGCCTCCGGA |
| AFG1L        | -0328 | -317 | - | 6.41  | CCTCCCACGGC |
| FOXO3        | -0481 | -470 | + | 4.38  | AGCGGCGGCGG |
| FOXO3        | -0344 | -333 | - | 7.48  | CCTCCCCCGCC |
| FOXO3        | -0328 | -317 | - | 4.44  | CCGCCCGGCGG |
| ARMC2        | -0332 | -321 | + | 8.86  | TGCGTGGGAGA |
| CEP57L1      | -0444 | -433 | - | 6.37  | CCGCCCAGGCA |
| CEP57L1      | -0279 | -268 | + | 6.13  | CCTGGGGGCGT |
| OSTM1        | -0464 | -453 | - | 4.05  | CCACCTCCGGC |
| PPIL6        | -0440 | -429 | - | 4.87  | CCTCTCCCGCC |
| PPIL6        | -0330 | -319 | - | 5.44  | CCGCCCCCATC |
| PPIL6        | -0290 | -279 | + | 10.15 | AGCGGGGGCGG |
| SMPD2        | -0455 | -444 | - | 10.15 | CCGCCCCCGCT |
| SMPD2        | -0415 | -404 | + | 5.44  | GATGGGGGCGG |
| SMPD2        | -0305 | -294 | + | 4.87  | GGCGGGAGAGG |
| MICAL1       | -0448 | -437 | + | 10.45 | GGCGTGGGCGG |
| ZBTB24       | -0314 | -303 | + | 4.66  | CGCGCAGGCGG |
| WASF1        | -0352 | -341 | + | 4.58  | CGAGGGGGCGG |
| CDC40        | -0496 | -485 | - | 4.58  | CCGCCCCCTCG |
| METTL24      | -0292 | -281 | + | 6.23  | CGCGGGAGAGG |

|          |       |      |   |       |              |
|----------|-------|------|---|-------|--------------|
| SLC22A16 | -0322 | -311 | + | 9.07  | GGCGGGGGCGG  |
| E.GASE   | -0335 | -324 | - | 4.77  | CCGCCCCCAGC  |
| CA.T1    | -0502 | -491 | - | 4.46  | CCGCCCTCCAGT |
| CA.T1    | -0480 | -469 | - | 4.11  | TCACCCCCACC  |
| CA.T1    | -0317 | -306 | - | 4.51  | CCGCGCCCGCG  |
| CA.T1    | -0285 | -274 | + | 4.02  | GCCGGGAGCGT  |
| LGALS3BP | -0402 | -391 | - | 7.22  | ACGCCCACAGT  |
| TIMP2    | -0295 | -284 | - | 5.06  | CCGCGCCCGCA  |
| USP36    | -0314 | -303 | + | 6.14  | GCTGTGGGCGT  |
| CYTH1    | -0429 | -418 | + | 6.04  | CGCGCGGGCGG  |
| CYTH1    | -0400 | -389 | + | 6.13  | CCTGGGGGCGG  |
| CYTH1    | -0329 | -318 | + | 6.04  | CGCGCGGGCGG  |
| CYTH1    | -0274 | -263 | + | 4.44  | CGCGGGGGCCGG |
| SOCS3    | -0361 | -350 | - | 4.66  | CCGCCGCCGCG  |
| SOCS3    | -0296 | -285 | - | 7.16  | TCGCCCCCGCC  |
| TMEM235  | -0286 | -275 | - | 4.09  | ACTCTCCCACT  |
| Z.HIT3   | -0293 | -282 | + | 4.53  | GGCGTGC GCGT |
| MYO19    | -0491 | -480 | + | 8.58  | CGTGGGGGCGG  |
| GG.BP2   | -0304 | -293 | - | 5.75  | CCGCCCTCGCT  |
| LHX1     | -0327 | -316 | - | 4.53  | CCTCCCCCAGG  |
| AATF     | -0407 | -396 | - | 4.03  | ACGCGCACACG  |
| AATF     | -0339 | -328 | - | 5.84  | ACGCCCCCAGT  |
| AATF     | -0310 | -299 | - | 4.44  | CCTCCCGCGCG  |
| ACACA    | -0423 | -412 | - | 7.46  | CCTCCTCCGCG  |
| ACACA    | -0401 | -390 | - | 4.62  | CCAGCCACGCG  |
| ACACA    | -0314 | -303 | - | 4.58  | CCGCCCCCTCG  |
| USP32    | -0305 | -294 | + | 4.61  | GGTGGGAGCGG  |
| USP32    | -0281 | -270 | + | 5.42  | CATGGAGGCGG  |
| ACYP2    | -0316 | -305 | - | 5.00  | CCTCCCTCGCA  |
| PSME4    | -0363 | -352 | + | 7.46  | CGCGGAGGAGG  |
| PSME4    | -0317 | -306 | + | 4.08  | AGGGTGGGAGG  |
| PSME4    | -0269 | -258 | + | 5.96  | CGGGTGGGCGG  |
| ERLEC1   | -0365 | -354 | + | 6.62  | TCCGTAGGCGA  |
| ERLEC1   | -0288 | -277 | + | 5.84  | GGTGGAGGCGG  |
| KC.S3    | -0345 | -334 | + | 9.24  | CGCGGGGGTGG  |
| GE.1     | -0495 | -484 | - | 6.04  | CCGCCCCGCGCG |
| SMC6     | -0349 | -338 | - | 5.88  | CCGCGCACGCG  |
| SMC6     | -0316 | -305 | + | 7.22  | GGTGGGGGCGG  |
| ODC1     | -0502 | -491 | - | 4.66  | CCGCCGCCGCG  |
| HPCAL1   | -0462 | -451 | + | 9.07  | GGCGGGGGCGG  |
| HPCAL1   | -0432 | -421 | + | 6.62  | GCCGGGGGCGG  |
| HPCAL1   | -0414 | -403 | + | 6.13  | CCTGGGGGCGT  |
| HPCAL1   | -0398 | -387 | + | 8.95  | AGCGGGGGTGG  |
| HPCAL1   | -0348 | -337 | - | 6.62  | CCGCCCCCGGC  |
| HPCAL1   | -0335 | -324 | - | 6.60  | CCGCCCTCCGGG |
| HPCAL1   | -0322 | -311 | - | 6.04  | CCGCCCCGCGG  |
| KLF11    | -0386 | -375 | - | 4.44  | CCGCCCCGCGG  |
| KLF11    | -0343 | -332 | - | 10.43 | CCGCCCCCGCG  |
| KLF11    | -0271 | -260 | + | 6.04  | CGCGCGGGCGG  |
| GRHL1    | -0462 | -451 | - | 4.68  | CCGCCCCGCGCC |
| GRHL1    | -0434 | -423 | - | 4.99  | CCGCCCCGGCA  |
| YWHAQ    | -0295 | -284 | + | 4.06  | CGTGGGAGCGA  |
| ADAM17   | -0355 | -344 | + | 6.14  | GCTGTGGGCGG  |
| CYS1     | -0496 | -485 | - | 7.70  | CCGCCCCCGGT  |
| CYS1     | -0478 | -467 | - | 4.25  | CCTCCCCCAGT  |
| CYS1     | -0434 | -423 | - | 4.25  | CCTCCCCCAGT  |
| CYS1     | -0406 | -395 | - | 7.70  | CCGCCCCCGGT  |
| CYS1     | -0363 | -352 | - | 4.16  | CCTCCCGCGCT  |
| CYS1     | -0346 | -335 | - | 4.16  | CCTCCCGCGCT  |
| ALLC     | -0377 | -366 | + | 6.94  | TCCGGGGGAGG  |
| RPS7     | -0374 | -363 | - | 5.00  | ACTCCCACGAA  |
| TRAPPC12 | -0432 | -421 | + | 5.44  | GATGGGGGCGG  |
| TRAPPC12 | -0273 | -262 | + | 10.99 | TGCGGGGGCGG  |
| PDZR.3   | -0396 | -385 | + | 4.60  | GGGGTGGGCGG  |
| PPP4R2   | -0491 | -480 | + | 9.07  | GGCGGGGGCGG  |
| PPP4R2   | -0473 | -462 | + | 9.07  | GGCGGGGGCGG  |
| PPP4R2   | -0455 | -444 | + | 7.94  | TGTGGGGGTGG  |
| PPP4R2   | -0408 | -397 | - | 7.70  | ACGCCCTCCGCC |
| GXYLT2   | -0419 | -408 | - | 4.33  | CCTCCTCCGTC  |

|            |       |       |      |       |                  |
|------------|-------|-------|------|-------|------------------|
| GXYLT2     | -0364 | -353  | +    | 4.33  | GACGGAGGAGG      |
| GXYLT2     | -0268 | -257  | -    | 4.66  | CCGCCGCCGCG      |
| SHQ1       | -0318 | -307  | -    | 6.25  | TCTCTCACGCA      |
| RYBP       | -0498 | -487  | -    | 9.07  | CCGCCCCCGCC      |
| RYBP       | -0405 | -394  | +    | 7.70  | GGCGGAGGCGG      |
| RYBP       | -0360 | -349  | +    | 4.38  | AGCGGCGGCGG      |
| RYBP       | -0301 | -290  | +    | 8.84  | CGCGGGGGAGG      |
| GXYLT2     | -0419 | -408  | -    | 4.33  | CCTCCTCCGTC      |
| GXYLT2     | -0364 | -353  | +    | 4.33  | GACGGAGGAGG      |
| GXYLT2     | -0268 | -257  | -    | 4.66  | CCGCCGCCGCG      |
| PROK2      | -0365 | -354  | +    | 9.07  | GGCGGGGGCGT      |
| PROK2      | -0276 | -265  | +    | 5.06  | TGCGGGGCGCGG     |
| DIPK2A     | -0444 | -433  | -    | 4.38  | CCGCCGCCGCT      |
| DIPK2A     | -0405 | -394  | +    | 5.88  | CGCGTGCGCGT      |
| TASP1      | -0346 | -335  | +    | 4.18  | CAGGTGGGCGT      |
| TASP1      | -0329 | -318  | -    | 4.04  | CCGGCCACGTG      |
| TASP1      | -0286 | -275  | -    | 7.04  | TCACCCCCGCT      |
| ISM1       | -0501 | -490  | -    | 4.68  | CCGCCGACGCC      |
| ISM1       | -0455 | -444  | -    | 6.62  | ACGCCCCCGGC      |
| ISM1       | -0423 | -412  | +    | 9.61  | TGCGGAGGCGG      |
| SPTLC3     | -0380 | -369  | +    | 4.38  | CATGTGAGTGT      |
| ZFP37      | -0311 | -300  | +    | 5.43  | GCCGGGGGTGG      |
| FKBP15     | -0461 | -450  | -    | 4.30  | CCGCCCCCCT       |
| FKBP15     | -0427 | -416  | +    | 4.44  | CGCAGGGGCGT      |
| SLC31A1    | -0353 | -342  | -    | 4.44  | ACGCCCCTGCG      |
| SLC31A1    | -0319 | -308  | +    | 4.30  | AGGGGGGGCGG      |
| PRPF4      | -0269 | -258  | +    | 5.26  | AGCGGAGGAGA      |
| ALAD       | -0497 | -486  | -    | 9.39  | CCTCCCCCGCA      |
| ALAD       | -0347 | -336  | +    | 12.37 | TGCGTGGGCGG      |
| RGS3       | -0428 | -417  | -    | 4.34  | ACACCCATGCT      |
| POLE3      | -0461 | -450  | -    | 4.02  | CCGCTCCCGGC      |
| POLE3      | -0379 | -368  | -    | 8.86  | TCTCCCACGCA      |
| Z.F618     | -0437 | -426  | +    | 6.62  | GCCGGGGGCGG      |
| Z.F618     | -0420 | -409  | +    | 10.43 | CGCGGGGGCGG      |
| Z.F618     | -0382 | -371  | +    | 4.66  | CGCGGCGGCGG      |
| Z.F618     | -0293 | -282  | +    | 6.10  | GGCGGAGGAGG      |
| Z.F618     | -0281 | -270  | +    | 4.38  | AGCGGCGGCGG      |
| AMBP       | -0446 | -435  | -    | 5.03  | CCTCCCCCGGC      |
| COL27A1    | -0273 | -262  | -    | 4.77  | CCGCCCCCAGC      |
| AK.A       | -0469 | -458  | -    | 9.61  | CCGCCTCCGCA      |
| AK.A       | -0457 | -446  | +    | 5.44  | GATGGGGGCGT      |
| AK.A       | -0345 | -334  | +    | 4.52  | TGTTTGGGCGG      |
| ATP6V1G1   |       | -0357 | -346 | -     | 6.10 CCTCCTCCGCC |
| T.FSF8     | -0494 | -483  | -    | 7.40  | CCACCCACACC      |
| T.FSF8     | -0451 | -440  | -    | 6.30  | CCTCCCACATT      |
| DCK        | -0398 | -387  | -    | 4.66  | CCGCCCCCGAG      |
| MOB1B      | -0419 | -408  | +    | 5.96  | TCCGGAGGTGT      |
| MOB1B      | -0327 | -316  | +    | 5.44  | GATGGGGGCGG      |
| GRSF1      | -0354 | -343  | -    | 5.78  | TCGCCTCCGCC      |
| RUFY3      | -0465 | -454  | +    | 4.44  | CGCCGGGGCGG      |
| UTP3       | -0500 | -489  | -    | 6.10  | ACTCCCCCGGT      |
| UTP3       | -0416 | -405  | -    | 4.77  | ACGCCCCCAGC      |
| R.PC3      | -0346 | -335  | -    | 5.68  | ACTCCTCCGTG      |
| COL11A1    | -0385 | -374  | +    | 5.96  | CGAGTGGGCGG      |
| SQLE       | -0503 | -492  | -    | 8.29  | ACGCCCCACT       |
| SQLE       | -0339 | -328  | +    | 4.60  | GGGGTGGGCGG      |
| WASHC5     | -0464 | -453  | -    | 7.75  | TCGCCCACACT      |
| TRIB1      | -0480 | -469  | -    | 4.58  | CCGCCCCCCC       |
| TRIB1      | -0336 | -325  | +    | 6.10  | GGCGGAGGAGG      |
| LRPPRC     | -0327 | -316  | -    | 4.32  | TCTCTCCCGCG      |
| PREPL      | -0468 | -457  | -    | 4.34  | ACAACCACGCT      |
| SLC3A1     | -0355 | -344  | +    | 7.40  | GGTGTGGGTGT      |
| KLHL29     | -0412 | -401  | -    | 5.62  | CCTCCCCCACC      |
| KLHL29     | -0399 | -388  | -    | 7.88  | CCACCCCCGCC      |
| KLHL29     | -0334 | -323  | -    | 5.00  | CCTCCCTCGCA      |
| PLCB1      | -0373 | -362  | +    | 4.56  | AGCGAGGGTGG      |
| C25H9orf43 |       | -0503 | -492 | -     | 7.70 CCGCCTCCGCC |
| COX20      | -0272 | -261  | +    | 10.15 | AGCGGGGGCGG      |
| CATSPERE   |       | -0277 | -266 | +     | 9.07 GGCGTAGGCGG |

|        |       |      |   |       |             |
|--------|-------|------|---|-------|-------------|
| ZBTB18 | -0472 | -461 | + | 5.24  | TGCGTGCGTG  |
| ZBTB18 | -0453 | -442 | - | 9.07  | CCGCCCCCGCC |
| ZBTB18 | -0441 | -430 | - | 9.07  | CCGCCCCCGCC |
| ZBTB18 | -0426 | -415 | - | 6.62  | CCGCCCCCGGC |
| ZBTB18 | -0286 | -275 | + | 10.15 | AGCGGGGGCGG |
| ADSS2  | -0481 | -470 | + | 5.96  | CGGGTGGGCGG |
| ADSS2  | -0441 | -430 | - | 7.16  | TCGCCCCCGCC |
| ADSS2  | -0391 | -380 | + | 4.58  | CGGGGGGGCGT |
| DESI2  | -0494 | -483 | + | 4.99  | TGCGGGGGCTT |
| DESI2  | -0345 | -334 | - | 9.06  | CCGCTCCGCG  |
| DESI2  | -0322 | -311 | + | 4.56  | AGCGGGGGGGG |
| H.R.PU | -0392 | -381 | + | 10.43 | CGCGGGGGCGG |
| H.R.PU | -0358 | -347 | + | 9.07  | GGCGGGGGCGG |
| H.R.PU | -0336 | -325 | + | 6.44  | TGCGTGCGCGG |
| H.R.PU | -0323 | -312 | - | 4.44  | CCGCCCCTGCG |

3 MA0079.2 SP1 11.1288627426 0.820000010729 -398:-322  
2.72407069304e-23

## list of hits

|              |       |      |   |       |            |
|--------------|-------|------|---|-------|------------|
| DUSP5        | -0368 | -358 | - | 8.96  | AGGGGCGGGG |
| ADD3         | -0326 | -316 | + | 5.80  | CCCTGCTTCC |
| XP.PEP1      | -0389 | -379 | + | 8.11  | CCCTGCCTCC |
| XP.PEP1      | -0353 | -343 | - | 9.67  | GTGGGCGGGG |
| XP.PEP1      | -0337 | -327 | - | 11.09 | GGGGGCGGGG |
| SMC3         | -0372 | -362 | + | 8.00  | CTCCGCCTCC |
| ADK          | -0398 | -388 | - | 6.94  | GTGGGCGGGA |
| KAT6B        | -0392 | -382 | - | 6.51  | AGGAGAGGGG |
| KAT6B        | -0350 | -340 | + | 6.75  | CCCCGCCCC  |
| SAMD8        | -0351 | -341 | + | 7.69  | CCCCGCTTCC |
| SAMD8        | -0322 | -312 | + | 7.39  | CCCTGCCCTC |
| VDAC2        | -0391 | -381 | - | 11.09 | GGGGGCGGGG |
| LOC100068191 | -0349 | -339 | + | 8.11  | CCCAGCCTCC |
| TMEM192      | -0337 | -327 | + | 9.13  | CCCTCCCTC  |
| CPE          | -0328 | -318 | + | 6.51  | CCCTCTCTCT |
| APELA        | -0388 | -378 | - | 6.34  | CGGGAGGGGG |
| APELA        | -0378 | -368 | - | 8.01  | GGGGGGGGAG |
| APELA        | -0359 | -349 | - | 9.86  | GGAGGAGGGG |
| APELA        | -0346 | -336 | - | 6.03  | GAGGCCGGGG |
| LOC106780946 | -0363 | -353 | - | 5.72  | GGCGGCGGCG |
| EPB41L3      | -0329 | -319 | - | 9.28  | GAGGGCGGGG |
| L3MBTL4      | -0362 | -352 | + | 5.66  | CCCATCTTCC |
| TMEM200C     | -0393 | -383 | + | 5.72  | CGCCGCCGCC |
| RIT2         | -0347 | -337 | - | 6.47  | GGGGGCAGGA |
| SYT4         | -0364 | -354 | - | 6.64  | GGGAGAGGAG |
| SYT4         | -0344 | -334 | - | 7.55  | GGAAGAGGGG |
| S.X3         | -0355 | -345 | - | 5.72  | GGCGGCGGCG |
| AFG1L        | -0363 | -353 | + | 7.97  | CCCTTCCTCC |
| AFG1L        | -0335 | -325 | + | 8.96  | CCCCGCCCT  |
| FOXO3        | -0393 | -383 | - | 5.72  | GGCGGCGGCG |
| FOXO3        | -0351 | -341 | + | 7.43  | CCCCGTCCCT |
| FOXO3        | -0340 | -330 | + | 6.90  | CCCCGCCGCA |
| FOXO3        | -0330 | -320 | + | 8.96  | CCCCGCCCCG |
| ARMC2        | -0383 | -373 | + | 7.54  | CTCCTCCAC  |
| SES.1        | -0372 | -362 | - | 9.28  | GAGGGCGGGG |
| SES.1        | -0353 | -343 | - | 9.86  | GGAGGAGGGG |
| CEP57L1      | -0398 | -388 | + | 9.28  | CCCCGCCCTC |
| OSTM1        | -0359 | -349 | - | 8.96  | TGGGGCGGGG |
| OSTM1        | -0338 | -328 | - | 9.56  | GGGGACGGGG |
| PPIL6        | -0368 | -358 | + | 11.09 | CCCCGCCCCC |
| PPIL6        | -0355 | -345 | + | 8.96  | CCCCGCCCCA |
| PPIL6        | -0345 | -335 | + | 6.38  | TCCCACCCCC |
| PPIL6        | -0332 | -322 | + | 7.71  | GCCCCCCCCC |
| SMPD2        | -0389 | -379 | - | 8.96  | TGGGGCGGGG |
| SMPD2        | -0376 | -366 | - | 11.09 | GGGGGCGGGG |
| MICAL1       | -0342 | -332 | + | 6.58  | CCCACTCCCC |
| ZBTB24       | -0372 | -362 | + | 8.96  | CCCCGCCCCG |
| ZBTB24       | -0362 | -352 | + | 8.96  | CCCCGCCCCG |
| FIG4         | -0363 | -353 | + | 9.09  | CTCCGCCCCC |
| FIG4         | -0345 | -335 | - | 8.96  | TGGGGCGGGG |



|            |       |       |      |       |                  |
|------------|-------|-------|------|-------|------------------|
| FIG4       | -0327 | -317  | -    | 8.02  | GGAGGTGGGG       |
| WASF1      | -0349 | -339  | -    | 11.09 | GGGGGCGGGG       |
| METTL24    | -0393 | -383  | +    | 5.71  | CCCCGGCCCA       |
| AK9        | -0337 | -327  | +    | 8.02  | CCCCACCTCC       |
| SLC22A16   |       | -0373 | -363 | -     | 5.97 AGAGGCTGGG  |
| SLC22A16   |       | -0363 | -353 | -     | 10.00 GGGGGGGGGG |
| SLC22A16   |       | -0348 | -338 | -     | 6.90 CGCGGCGGGG  |
| SLC22A16   |       | -0325 | -315 | -     | 6.90 AGCGGCGGGG  |
| E.GASE     | -0392 | -382  | +    | 5.95  | CCCAGGCCCC       |
| E.GASE     | -0368 | -358  | +    | 9.28  | CCCCGCCCTC       |
| E.GASE     | -0352 | -342  | +    | 8.96  | CCCCGCCCCA       |
| E.GASE     | -0337 | -327  | +    | 11.09 | CCCCGCCCCC       |
| E.GASE     | -0325 | -315  | +    | 7.97  | CCCTTCCTCC       |
| C1QT.F1    | -0369 | -359  | -    | 6.47  | GGAGGAGGGC       |
| CA.T1      | -0376 | -366  | +    | 7.86  | CTCCTCCTCC       |
| LGALS3BP   |       | -0383 | -373 | -     | 5.83 AGAGGAAGGG  |
| TIMP2      | -0395 | -385  | -    | 8.81  | CGGGGAGGGG       |
| TIMP2      | -0343 | -333  | -    | 8.00  | GGAGGCGGAG       |
| USP36      | -0350 | -340  | -    | 7.43  | CGGGACGGGG       |
| CYTH1      | -0397 | -387  | -    | 9.09  | GGGGGCGGAG       |
| CYTH1      | -0323 | -313  | -    | 5.72  | GGCGGCGGCG       |
| SOCS3      | -0375 | -365  | +    | 5.72  | CGCCGCCGCC       |
| SOCS3      | -0363 | -353  | +    | 5.72  | CGCCGCCGCC       |
| SOCS3      | -0349 | -339  | +    | 5.84  | CTCCGCCCCC       |
| SOCS3      | -0322 | -312  | +    | 6.89  | CCCAGCTCCC       |
| TMEM235    | -0374 | -364  | +    | 8.78  | CCCCGCTCCC       |
| TMEM235    | -0361 | -351  | +    | 6.89  | CCCTGCTCCC       |
| TMEM235    | -0347 | -337  | +    | 7.87  | CCCCGCCTCT       |
| TMEM235    | -0331 | -321  | +    | 7.25  | CCCCGTTCCT       |
| CA4        | -0388 | -378  | -    | 6.79  | GGGAGCGGAG       |
| CA4        | -0355 | -345  | -    | 7.72  | AGAGGAGGGG       |
| CA4        | -0334 | -324  | -    | 8.95  | GGGGGAGGAG       |
| MYO19      | -0391 | -381  | -    | 5.73  | AGAGGAGGAG       |
| GG.BP2     | -0363 | -353  | -    | 10.00 | GGAGGCGGGG       |
| GG.BP2     | -0334 | -324  | +    | 7.00  | CCCTCCCTTG       |
| GG.BP2     | -0324 | -314  | +    | 7.30  | CCCCACCCTC       |
| DHRS11     | -0370 | -360  | -    | 8.96  | AGGGGCGGGG       |
| DHRS11     | -0350 | -340  | -    | 8.96  | AGGGGCGGGG       |
| LHX1       | -0372 | -362  | +    | 6.54  | TCCCGCCCTC       |
| LHX1       | -0362 | -352  | +    | 6.06  | CCCTCCCGCC       |
| LHX1       | -0352 | -342  | +    | 6.19  | CTCCCCCCTC       |
| LHX1       | -0341 | -331  | +    | 5.82  | GCCTGCCCCC       |
| LHX1       | -0330 | -320  | +    | 8.47  | CCCCCTCCCC       |
| ACACA      | -0322 | -312  | +    | 5.65  | GCCCGCCGCC       |
| USP32      | -0396 | -386  | -    | 6.19  | GAGGGGGGAG       |
| USP32      | -0360 | -350  | -    | 7.00  | AAGGGAGGGG       |
| USP32      | -0325 | -315  | -    | 9.13  | GAGGGAGGGG       |
| SPTB.1     | -0360 | -350  | +    | 6.40  | TCCCTCCCTC       |
| PSME4      | -0360 | -350  | -    | 6.54  | GGAGGAGGCG       |
| PSME4      | -0345 | -335  | -    | 6.51  | CGGAGAGGGG       |
| PSME4      | -0333 | -323  | -    | 7.84  | GGGGCCGGGG       |
| C15H2orf73 |       | -0347 | -337 | +     | 8.36 TCCCGCCCCC  |
| KC.S3      | -0362 | -352  | -    | 8.36  | GGGGGCGGGA       |
| KC.S3      | -0343 | -333  | -    | 5.98  | CGGGGGTGGG       |
| GE.1       | -0376 | -366  | -    | 6.22  | TGGGGCGGGA       |
| SMC6       | -0387 | -377  | +    | 7.72  | CCCTTCCTCT       |
| RDH14      | -0360 | -350  | +    | 5.64  | CGCCGCCCTT       |
| .OL10      | -0384 | -374  | +    | 6.92  | CCCTTCCCCT       |
| ODC1       | -0363 | -353  | +    | 6.11  | CTCAGCCTCC       |
| ODC1       | -0351 | -341  | +    | 5.72  | CGCCGCCGCC       |
| HPCAL1     | -0396 | -386  | -    | 5.98  | CGGGGGTGGG       |
| HPCAL1     | -0350 | -340  | +    | 11.09 | CCCCGCCCCC       |
| HPCAL1     | -0337 | -327  | +    | 10.00 | CCCCGCCTCC       |
| HPCAL1     | -0324 | -314  | +    | 6.54  | TCCCGCCCTC       |
| KLF11      | -0388 | -378  | +    | 8.96  | CCCCGCCCCG       |
| KLF11      | -0345 | -335  | +    | 11.09 | CCCCGCCCCC       |
| GRHL1      | -0395 | -385  | +    | 6.62  | GCCCGCCTCC       |
| GRHL1      | -0374 | -364  | +    | 6.08  | TCCCTCCCCG       |
| TAF1B      | -0349 | -339  | -    | 7.40  | CTGGGAGGGG       |

|              |       |       |      |       |                  |
|--------------|-------|-------|------|-------|------------------|
| YWHAQ        | -0398 | -388  | +    | 6.22  | TCCCGCCCCG       |
| YWHAQ        | -0387 | -377  | +    | 7.37  | CCCCCTCGCC       |
| YWHAQ        | -0336 | -326  | -    | 7.27  | GGAGGCGGGA       |
| CYS1         | -0391 | -381  | +    | 7.40  | CCCCTCCCAG       |
| CYS1         | -0376 | -366  | +    | 7.84  | CCCCGGCCCC       |
| CYS1         | -0353 | -343  | +    | 6.22  | TCCCGCCCCCT      |
| ALLC         | -0375 | -365  | -    | 5.98  | CGGGGGAGGG       |
| ALLC         | -0349 | -339  | +    | 6.49  | CCCCATCTCC       |
| COLEC11      | -0327 | -317  | +    | 10.00 | CCCCCCCCC        |
| ADI1         | -0328 | -318  | +    | 9.67  | CCCCGCCAC        |
| TRAPPC12     |       | -0397 | -387 | +     | 9.56 CCCCCGTCCCC |
| TRAPPC12     |       | -0365 | -355 | +     | 9.67 CCCCCGCCAC  |
| DCDC2C       | -0380 | -370  | +    | 8.64  | CCCCCTCTCCC      |
| PDZR.3       | -0393 | -383  | -    | 6.94  | GTGGGCGGGA       |
| PPP4R2       | -0348 | -338  | -    | 9.04  | GGCGGCGGGG       |
| GXYLT2       | -0328 | -318  | +    | 9.04  | CCCCGCCGCC       |
| SHQ1         | -0384 | -374  | +    | 6.44  | CCCTTTCTCC       |
| SHQ1         | -0356 | -346  | +    | 5.74  | TCCCGTCTCC       |
| SHQ1         | -0333 | -323  | -    | 6.22  | TGGGGCGGGA       |
| RYBP         | -0357 | -347  | -    | 5.72  | GGCGGCGGCG       |
| GXYLT2       | -0328 | -318  | +    | 9.04  | CCCCGCCGCC       |
| MIR9170      | -0393 | -383  | -    | 6.25  | GTGGACAGGG       |
| PROK2        | -0368 | -358  | -    | 7.87  | CGAGGCGGGG       |
| DIPK2A       | -0371 | -361  | +    | 5.92  | CCCCGCACTC       |
| DIPK2A       | -0361 | -351  | +    | 6.75  | CCCCCGCCCC       |
| DIPK2A       | -0332 | -322  | -    | 7.95  | GGCGGGGGGG       |
| TASP1        | -0365 | -355  | -    | 9.09  | GGGGGCGGAG       |
| ISM1         | -0376 | -366  | +    | 5.71  | CCCCGGCCCCG      |
| ISM1         | -0361 | -351  | +    | 6.90  | CCCCGCCGCG       |
| ISM1         | -0327 | -317  | -    | 8.78  | GGGAGCGGGG       |
| SPTLC3       | -0338 | -328  | +    | 7.12  | CTCCACCCCC       |
| LOC100034197 |       | -0384 | -374 | -     | 7.54 GTGGGAGGAG  |
| LOC100056127 |       | -0358 | -348 | -     | 7.54 GTGGGAGGAG  |
| SLC31A1      | -0322 | -312  | -    | 5.64  | GGCAGGGGGG       |
| PRPF4        | -0396 | -386  | +    | 6.90  | CTCCTCCGCC       |
| WDR31        | -0368 | -358  | -    | 6.05  | CAAGGCGGGG       |
| BSPRY        | -0322 | -312  | -    | 5.71  | CGGGCCGGGG       |
| HDHD3        | -0380 | -370  | -    | 6.06  | GGCGGGAGGG       |
| HDHD3        | -0368 | -358  | -    | 6.96  | CGGGGCGGAG       |
| HDHD3        | -0353 | -343  | -    | 11.09 | GGGGGCGGGG       |
| HDHD3        | -0328 | -318  | -    | 11.09 | GGGGGCGGGG       |
| ALAD         | -0344 | -334  | -    | 9.67  | GTGGGCGGGG       |
| POLE3        | -0324 | -314  | -    | 6.92  | TGGGGAAGGG       |
| Z.F618       | -0397 | -387  | -    | 5.64  | AGGGGCGGCG       |
| Z.F618       | -0379 | -369  | -    | 9.04  | GGCGGCGGGG       |
| AMBP         | -0386 | -376  | +    | 5.95  | CCCTGGCCCC       |
| COL27A1      | -0391 | -381  | +    | 6.65  | CCCCCACCC        |
| ATP6V1G1     |       | -0359 | -349 | +     | 7.12 TCCCTCCTCC  |
| ATP6V1G1     |       | -0348 | -338 | +     | 8.96 CCCCCCCCCCT |
| T.FSF15      | -0331 | -321  | +    | 7.70  | CCCCACCCAC       |
| T.C          | -0398 | -388  | -    | 6.89  | GGGAGCAGGG       |
| TEX48        | -0392 | -382  | +    | 6.25  | CCCAGTCCAC       |
| DCK          | -0365 | -355  | +    | 8.96  | CCCCGCCCT        |
| DCK          | -0345 | -335  | +    | 9.09  | CTCCGCCCCC       |
| MOB1B        | -0368 | -358  | -    | 8.96  | AGGGGCGGGG       |
| MOB1B        | -0324 | -314  | -    | 7.77  | GGGGGCGGCG       |
| GRSF1        | -0392 | -382  | +    | 8.96  | CCCCGCCCA        |
| GRSF1        | -0341 | -331  | +    | 7.87  | CCCCGCCCTCG      |
| RUFY3        | -0344 | -334  | +    | 7.77  | CGCCGCCCCC       |
| COL11A1      | -0382 | -372  | -    | 7.68  | GTGGGCGGAG       |
| SQLE         | -0367 | -357  | -    | 9.67  | GTGGGCGGGG       |
| SQLE         | -0336 | -326  | -    | 9.67  | GTGGGCGGGG       |
| WASHC5       | -0340 | -330  | +    | 6.96  | CTCCGCCCT        |
| .SMCE2       | -0334 | -324  | -    | 6.96  | AGGGGCGGAG       |
| TRIB1        | -0339 | -329  | -    | 8.00  | GGAGGCGGAG       |
| PPM1B        | -0325 | -315  | +    | 6.05  | CCCCGCCTTT       |
| PREPL        | -0349 | -339  | -    | 5.89  | TGAGGTGGGG       |
| KLHL29       | -0395 | -385  | +    | 9.67  | CCCCGCCAC        |
| KLHL29       | -0339 | -329  | +    | 6.62  | CCCCGCCCTCC      |

|        |       |      |   |       |             |
|--------|-------|------|---|-------|-------------|
| PLCB1  | -0394 | -384 | - | 6.33  | GGGGGAAGGA  |
| PLCB1  | -0362 | -352 | - | 6.92  | CGGGGAAGGG  |
| PLCB1  | -0345 | -335 | - | 7.86  | GGAGGAGGAG  |
| PLCB1  | -0332 | -322 | - | 7.14  | GAGGGAGGAG  |
| HAO1   | -0379 | -369 | - | 5.73  | TGAGGAGGAG  |
| HAO1   | -0366 | -356 | - | 5.71  | GAGGAAAGGG  |
| COX20  | -0344 | -334 | + | 6.96  | CTCCGCCCCG  |
| ADSS2  | -0393 | -383 | - | 5.82  | CGCGGGGGGG  |
| DESI2  | -0347 | -337 | + | 8.00  | CTCCGCCCTCC |
| DESI2  | -0322 | -312 | - | 5.82  | AGCGGGGGGG  |
| H.R.PU | -0389 | -379 | - | 11.09 | GGGGGCGGGG  |
| H.R.PU | -0355 | -345 | - | 11.09 | GGGGGCGGGG  |

4 MA0039.2 Klf4 12.6183576774 0.771222760739 -371:-312  
1.66990586527e-12

## list of hits

|              |       |      |   |       |             |
|--------------|-------|------|---|-------|-------------|
| DUSP5        | -0367 | -357 | + | 7.75  | GGGGCGGGGA  |
| XP.PEP1      | -0352 | -342 | + | 10.68 | TGGGCGGGGC  |
| XP.PEP1      | -0336 | -326 | + | 10.13 | GGGGCGGGGC  |
| SMC3         | -0314 | -304 | + | 7.12  | GGGGAGGGGT  |
| KAT6B        | -0350 | -340 | - | 7.85  | CCCCCGCCCC  |
| KAT6B        | -0319 | -309 | - | 7.25  | GCAACGCCCA  |
| LOC100061588 | -0326 | -316 | + | 5.66  | AAGGTGTGGT  |
| MSMO1        | -0317 | -307 | + | 6.37  | GAGGCGGGGC  |
| TMEM192      | -0343 | -333 | - | 7.53  | GACACGCCCC  |
| EPB41L3      | -0328 | -318 | + | 8.11  | AGGGCGGGGA  |
| SYT4         | -0338 | -328 | + | 5.94  | GGGGAGGGGG  |
| .R2E1        | -0324 | -314 | + | 5.35  | GGGGTGTGTG  |
| AFG1L        | -0336 | -326 | - | 10.13 | GCCCCGCCCC  |
| FOXO3        | -0336 | -326 | - | 7.06  | GCCGCACCCC  |
| SES.1        | -0371 | -361 | + | 8.11  | AGGGCGGGGA  |
| SES.1        | -0347 | -337 | + | 9.02  | GGGGCGGGGT  |
| OSTM1        | -0358 | -348 | + | 10.13 | GGGGCGGGGC  |
| PPIL6        | -0369 | -359 | - | 10.13 | GCCCCGCCCC  |
| PPIL6        | -0356 | -346 | - | 10.13 | GCCCCGCCCC  |
| PPIL6        | -0346 | -336 | - | 5.78  | ATCCCACCCC  |
| PPIL6        | -0333 | -323 | - | 6.84  | GGCCCCGCCCC |
| MICAL1       | -0342 | -332 | - | 5.88  | CCCACTCCCC  |
| ZBTB24       | -0363 | -353 | - | 10.13 | GCCCCGCCCC  |
| FIG4         | -0364 | -354 | - | 7.48  | GCTCCGCCCC  |
| FIG4         | -0344 | -334 | + | 10.13 | GGGGCGGGGC  |
| FIG4         | -0326 | -316 | + | 5.37  | GAGGTGGGGT  |
| WASF1        | -0348 | -338 | + | 10.13 | GGGGCGGGGC  |
| WASF1        | -0316 | -306 | - | 9.02  | ACCCCGCCCC  |
| DDO          | -0327 | -317 | + | 6.19  | AGGGTGGGCT  |
| AK9          | -0338 | -328 | - | 5.37  | ACCCACCTC   |
| AK9          | -0320 | -310 | - | 10.13 | GCCCCGCCCC  |
| SLC22A16     | -0357 | -347 | + | 5.65  | GGGGGGGGGC  |
| SLC22A16     | -0318 | -308 | + | 10.13 | GGGGCGGGGC  |
| LOC102147786 | -0355 | -345 | + | 7.58  | GGGGTGGAGC  |
| E.GASE       | -0369 | -359 | - | 10.49 | GCCCCGCCCT  |
| E.GASE       | -0353 | -343 | - | 10.13 | GCCCCGCCCC  |
| E.GASE       | -0338 | -328 | - | 10.13 | GCCCCGCCCC  |
| CYTH1        | -0315 | -305 | + | 7.71  | CGGGCGGGGC  |
| SOCS3        | -0328 | -318 | - | 5.57  | GCCCGGCCCA  |
| CA4          | -0333 | -323 | + | 5.57  | GGGGAGGAGC  |
| GG.BP2       | -0362 | -352 | + | 6.37  | GAGGCGGGGC  |
| GG.BP2       | -0335 | -325 | - | 8.59  | GCCCCCTCCCT |
| GG.BP2       | -0325 | -315 | - | 10.60 | GCCCCACCTT  |
| DHRS11       | -0369 | -359 | + | 10.13 | GGGGCGGGGC  |
| DHRS11       | -0349 | -339 | + | 10.13 | GGGGCGGGGC  |
| DHRS11       | -0318 | -308 | + | 10.13 | GGGGCGGGGC  |
| LHX1         | -0336 | -326 | - | 7.85  | CCCCCGCCCC  |
| AATF         | -0342 | -332 | - | 6.71  | GCAACGCCCA  |
| AATF         | -0318 | -308 | - | 10.13 | GCCCCGCCCC  |
| USP32        | -0359 | -349 | + | 6.21  | AGGGAGGGGA  |
| USP32        | -0337 | -327 | + | 6.72  | AGGGCGGAGT  |
| USP32        | -0324 | -314 | + | 6.21  | AGGGAGGGGA  |
| USP32        | -0312 | -302 | + | 9.02  | GGGGCGGGGT  |

|              |       |       |      |       |                  |
|--------------|-------|-------|------|-------|------------------|
| SPTB.1       | -0361 | -351  | -    | 5.24  | GTCCCTCCCT       |
| SPTB.1       | -0320 | -310  | -    | 5.48  | GCCCCGCGCA       |
| PSME4        | -0339 | -329  | +    | 7.95  | GGGGTGGGGG       |
| C15H2orf73   |       | -0348 | -338 | -     | 6.79 GTCCCGCCCC  |
| KC.S3        | -0341 | -331  | +    | 7.70  | GGGGTGGGTC       |
| SMC6         | -0323 | -313  | +    | 6.60  | CGGGCGGGGT       |
| SMC6         | -0312 | -302  | +    | 10.13 | GGGGCGGGGC       |
| HPCAL1       | -0351 | -341  | -    | 10.13 | GCCCCGCCCC       |
| HPCAL1       | -0325 | -315  | -    | 7.15  | GTCCCGCCCT       |
| RRM2         | -0361 | -351  | -    | 7.71  | GCCCCGCCCC       |
| RRM2         | -0333 | -323  | -    | 10.61 | GCCACGCCCA       |
| KLF11        | -0351 | -341  | -    | 6.95  | GCCGCGCCCC       |
| KLF11        | -0332 | -322  | -    | 7.42  | GCCGCACCTT       |
| KLF11        | -0314 | -304  | -    | 10.13 | GCCCCGCCCC       |
| TAF1B        | -0348 | -338  | +    | 6.48  | TGGGAGGGGG       |
| ADAM17       | -0351 | -341  | +    | 7.32  | TGGGCGGTGC       |
| CYS1         | -0371 | -361  | -    | 10.13 | GCCCCGCCCC       |
| CYS1         | -0349 | -339  | -    | 5.81  | GCCCCTCCCC       |
| ADI1         | -0359 | -349  | -    | 5.81  | GCCCCTCCCC       |
| ADI1         | -0334 | -324  | -    | 6.84  | GGCCCGCCCC       |
| TRAPPC12     |       | -0366 | -356 | -     | 10.68 GCCCCGCCCA |
| DCDC2C       | -0371 | -361  | +    | 5.17  | CGGGCGGGTC       |
| SHQ1         | -0332 | -322  | +    | 6.79  | GGGGCGGGAC       |
| PROK2        | -0361 | -351  | +    | 7.78  | GGGGCGTGGG       |
| DIPK2A       | -0361 | -351  | -    | 7.85  | CCCCCGCCCC       |
| TASP1        | -0312 | -302  | -    | 6.20  | AGCACGCCCA       |
| ISM1         | -0357 | -347  | -    | 7.49  | GCCGCGGCCA       |
| SPTLC3       | -0339 | -329  | -    | 5.20  | TCTCCACCCC       |
| LOC100034197 |       | -0313 | -303 | +     | 5.78 GGGGAGTGGA  |
| SLC31A1      | -0356 | -346  | -    | 5.12  | CCTACGCCCC       |
| SLC31A1      | -0315 | -305  | +    | 10.13 | GGGGCGGGGC       |
| WDR31        | -0367 | -357  | +    | 6.73  | AAGGCGGGGC       |
| HDHD3        | -0352 | -342  | +    | 10.13 | GGGGCGGGGC       |
| HDHD3        | -0327 | -317  | +    | 10.13 | GGGGCGGGGC       |
| ALAD         | -0343 | -333  | +    | 10.68 | TGGGCGGGGC       |
| Z.F618       | -0319 | -309  | -    | 7.85  | CCCCCGCCCC       |
| AK.A         | -0364 | -354  | +    | 5.15  | TTGGCGGGGC       |
| AK.A         | -0341 | -331  | +    | 5.73  | TGGGCGGAGG       |
| ATP6V1G1     |       | -0354 | -344 | -     | 5.19 CCTCCGCCCC  |
| T.FSF15      | -0332 | -322  | -    | 10.78 | GCCCCACCCA       |
| DCK          | -0366 | -356  | -    | 10.13 | GCCCCGCCCC       |
| DCK          | -0346 | -336  | -    | 7.48  | GCTCCGCCCC       |
| MOB1B        | -0367 | -357  | +    | 9.02  | GGGGCGGGGT       |
| GRSF1        | -0342 | -332  | -    | 6.37  | GCCCCGCCCT       |
| SQLE         | -0366 | -356  | +    | 10.68 | TGGGCGGGGC       |
| SQLE         | -0335 | -325  | +    | 10.68 | TGGGCGGGGC       |
| WASHC5       | -0353 | -343  | -    | 10.43 | GCCACGCCCT       |
| .SMCE2       | -0321 | -311  | +    | 10.43 | AGGGCGTGGC       |
| ABCG5        | -0353 | -343  | -    | 7.24  | GGCACACCTT       |
| SLC3A1       | -0357 | -347  | +    | 7.89  | GGGGTGTGGG       |
| SLC3A1       | -0345 | -335  | +    | 5.80  | TGGGTGTGTA       |
| PLCB1        | -0312 | -302  | +    | 8.20  | AGGGCGGGGG       |
| TMX4         | -0325 | -315  | +    | 10.07 | GGGGCGTGGC       |
| COX20        | -0345 | -335  | -    | 5.19  | CCTCCGCCCC       |
| H.R.PU       | -0354 | -344  | +    | 10.13 | GGGGCGGGGC       |
| H.R.PU       | -0326 | -316  | -    | 5.90  | GCGCCGCCCC       |

5 MA0006.1 Arnt::Ahr 9.53241699429 0.715277771155 -530:-303  
3.42488344196e-11

|              |       |       |      |      |             |
|--------------|-------|-------|------|------|-------------|
| list of hits |       |       |      |      |             |
| RBM20        | -0369 | -363  | -    | 7.05 | CACGCG      |
| MSM01        | -0491 | -485  | -    | 7.05 | CACGCG      |
| LOC100068026 |       | -0346 | -340 | -    | 7.37 CACGCA |
| LOC100068026 |       | -0346 | -340 | -    | 7.37 CACGCA |
| EPB41L3      | -0467 | -461  | +    | 7.05 | CGCGTG      |
| .R2E1        | -0426 | -420  | +    | 7.05 | CGCGTG      |
| ARMC2        | -0332 | -326  | +    | 7.37 | TGCGTG      |
| SES.1        | -0481 | -475  | -    | 7.37 | CACGCA      |
| CEP57L1      | -0331 | -325  | -    | 7.37 | CACGCA      |

|              |       |       |      |      |        |        |
|--------------|-------|-------|------|------|--------|--------|
| CEP57L1      | -0325 | -319  | +    | 7.37 | TGCGTG |        |
| PPIL6        | -0508 | -502  | -    | 7.05 | CACGCG |        |
| LOC102147786 |       | -0513 | -507 | -    | 7.37   | CACGCA |
| USP36        | -0386 | -380  | +    | 7.37 | TGCGTG |        |
| CYTH1        | -0528 | -522  | +    | 7.37 | TGCGTG |        |
| CYTH1        | -0477 | -471  | +    | 7.05 | CGCGTG |        |
| CYTH1        | -0435 | -429  | +    | 7.37 | TGCGTG |        |
| CYTH1        | -0375 | -369  | +    | 7.05 | CGCGTG |        |
| CYTH1        | -0363 | -357  | +    | 7.05 | CGCGTG |        |
| CYTH1        | -0345 | -339  | +    | 7.05 | CGCGTG |        |
| AFMID        | -0387 | -381  | +    | 7.05 | CGCGTG |        |
| GG.BP2       | -0456 | -450  | -    | 7.05 | CACGCG |        |
| DHRS11       | -0323 | -317  | +    | 7.05 | CGCGTG |        |
| AATF         | -0422 | -416  | -    | 7.05 | CACGCG |        |
| AATF         | -0408 | -402  | -    | 7.05 | CACGCG |        |
| ACACA        | -0396 | -390  | -    | 7.05 | CACGCG |        |
| ACACA        | -0390 | -384  | -    | 7.05 | CACGCG |        |
| ACACA        | -0372 | -366  | +    | 7.37 | TGCGTG |        |
| ACACA        | -0334 | -328  | +    | 7.37 | TGCGTG |        |
| GE.1         | -0488 | -482  | +    | 7.05 | CGCGTG |        |
| GE.1         | -0308 | -302  | -    | 7.37 | CACGCA |        |
| SMC6         | -0524 | -518  | +    | 7.37 | TGCGTG |        |
| SMC6         | -0344 | -338  | -    | 7.05 | CACGCG |        |
| .OL10        | -0416 | -410  | +    | 7.05 | CGCGTG |        |
| ODC1         | -0416 | -410  | -    | 7.05 | CACGCG |        |
| HPCAL1       | -0508 | -502  | +    | 7.05 | CGCGTG |        |
| KLF11        | -0460 | -454  | -    | 7.05 | CACGCG |        |
| GRHL1        | -0496 | -490  | -    | 7.05 | CACGCG |        |
| GRHL1        | -0481 | -475  | -    | 7.05 | CACGCG |        |
| PDZR.3       | -0365 | -359  | +    | 7.37 | TGCGTG |        |
| PPP4R2       | -0394 | -388  | -    | 7.05 | CACGCG |        |
| SHQ1         | -0313 | -307  | -    | 7.37 | CACGCA |        |
| RYBP         | -0448 | -442  | +    | 7.05 | CGCGTG |        |
| PROK2        | -0453 | -447  | +    | 7.05 | CGCGTG |        |
| PROK2        | -0379 | -373  | +    | 7.37 | TGCGTG |        |
| DIPK2A       | -0405 | -399  | +    | 7.05 | CGCGTG |        |
| CDC26        | -0519 | -513  | +    | 7.05 | CGCGTG |        |
| PRPF4        | -0498 | -492  | +    | 7.37 | TGCGTG |        |
| ALAD         | -0457 | -451  | -    | 7.05 | CACGCG |        |
| ALAD         | -0347 | -341  | +    | 7.37 | TGCGTG |        |
| POLE3        | -0374 | -368  | -    | 7.37 | CACGCA |        |
| COL27A1      | -0528 | -522  | -    | 7.05 | CACGCG |        |
| COL27A1      | -0317 | -311  | +    | 7.05 | CGCGTG |        |
| T.FSF8       | -0515 | -509  | -    | 7.37 | CACGCA |        |
| T.FSF8       | -0478 | -472  | -    | 7.37 | CACGCA |        |
| DCK          | -0304 | -298  | -    | 7.37 | CACGCA |        |
| COL11A1      | -0451 | -445  | +    | 7.05 | CGCGTG |        |
| SOLE         | -0486 | -480  | -    | 7.37 | CACGCA |        |
| SOLE         | -0395 | -389  | +    | 7.37 | TGCGTG |        |
| .SMCE2       | -0485 | -479  | -    | 7.05 | CACGCG |        |
| DY.C2LI1     |       | -0304 | -298 | -    | 7.37   | CACGCA |
| PREPL        | -0490 | -484  | -    | 7.37 | CACGCA |        |
| TMX4         | -0487 | -481  | -    | 7.05 | CACGCG |        |
| TMX4         | -0453 | -447  | -    | 7.05 | CACGCG |        |
| HAO1         | -0489 | -483  | +    | 7.37 | TGCGTG |        |
| COX20        | -0322 | -316  | -    | 7.05 | CACGCG |        |
| ZBTB18       | -0476 | -470  | +    | 7.05 | CGCGTG |        |
| ZBTB18       | -0468 | -462  | +    | 7.37 | TGCGTG |        |
| ADSS2        | -0525 | -519  | -    | 7.37 | CACGCA |        |
| DESI2        | -0530 | -524  | +    | 7.37 | TGCGTG |        |
| H.R.PU       | -0336 | -330  | +    | 7.37 | TGCGTG |        |
| H.R.PU       | -0303 | -297  | +    | 7.37 | TGCGTG |        |

6 MA0161.1 NFIC 6.98267924778 0.5685040611 -1507:-1417  
1.32023656629e-09  
list of hits  
VDAC2 -1432 -1426 + 6.73 TTGGCA  
LOC100068208 -1480 -1474 + 6.73 TTGGCA  
LOC100068026 -1446 -1440 + 6.73 TTGGCA

|              |       |       |   |      |        |
|--------------|-------|-------|---|------|--------|
| LOC100068026 | -1423 | -1417 | - | 6.73 | TGCCAA |
| LOC100068026 | -1446 | -1440 | + | 6.73 | TTGGCA |
| LOC100068026 | -1423 | -1417 | - | 6.73 | TGCCAA |
| RIT2         | -1465 | -1459 | - | 5.83 | TGCCAG |
| SYT4         | -1482 | -1476 | - | 6.73 | TGCCAA |
| SES.1        | -1417 | -1411 | - | 5.91 | AGCCAA |
| OSTM1        | -1506 | -1500 | + | 6.73 | TTGGCA |
| PPIL6        | -1439 | -1433 | + | 5.83 | CTGGCA |
| PPIL6        | -1432 | -1426 | - | 5.91 | AGCCAA |
| CD164        | -1502 | -1496 | + | 5.91 | TTGGCT |
| CIQT.F1      | -1498 | -1492 | + | 5.91 | TTGGCT |
| CA4          | -1455 | -1449 | + | 6.73 | TTGGCA |
| PIGW         | -1492 | -1486 | - | 5.83 | TGCCAG |
| LHX1         | -1488 | -1482 | - | 5.91 | AGCCAA |
| USP32        | -1457 | -1451 | + | 5.91 | TTGGCT |
| ERLEC1       | -1424 | -1418 | + | 5.83 | CTGGCA |
| SMC6         | -1426 | -1420 | + | 5.91 | TTGGCT |
| LOC100056590 | -1481 | -1475 | + | 5.91 | TTGGCT |
| .OL10        | -1441 | -1435 | - | 5.83 | TGCCAG |
| ODC1         | -1418 | -1412 | + | 5.83 | CTGGCA |
| GRHL1        | -1483 | -1477 | + | 5.83 | CTGGCA |
| TAF1B        | -1457 | -1451 | + | 5.91 | TTGGCT |
| COLEC11      | -1454 | -1448 | - | 5.83 | TGCCAG |
| TRAPPC12     | -1423 | -1417 | + | 5.83 | CTGGCA |
| RYBP         | -1455 | -1449 | - | 5.91 | AGCCAA |
| PROK2        | -1507 | -1501 | + | 6.73 | TTGGCA |
| SPTLC3       | -1502 | -1496 | + | 5.91 | TTGGCT |
| LOC100056127 | -1492 | -1486 | + | 6.73 | TTGGCA |
| FKBP15       | -1432 | -1426 | + | 5.91 | TTGGCT |
| SLC31A1      | -1473 | -1467 | + | 6.73 | TTGGCA |
| PRPF4        | -1468 | -1462 | - | 5.91 | AGCCAA |
| RGS3         | -1451 | -1445 | + | 5.91 | TTGGCT |
| RGS3         | -1427 | -1421 | + | 5.91 | TTGGCT |
| ATP6V1G1     | -1445 | -1439 | + | 5.83 | CTGGCA |
| T.FSF15      | -1461 | -1455 | + | 6.73 | TTGGCA |
| LOC100050100 | -1489 | -1483 | + | 5.91 | TTGGCT |
| GC           | -1420 | -1414 | + | 6.73 | TTGGCA |
| JCHAI.       | -1425 | -1419 | + | 5.83 | CTGGCA |
| SLC4A4       | -1466 | -1460 | - | 6.73 | TGCCAA |
| SLC4A4       | -1449 | -1443 | - | 6.73 | TGCCAA |
| WASHC5       | -1423 | -1417 | + | 5.83 | CTGGCA |
| TRIB1        | -1469 | -1463 | + | 5.83 | CTGGCA |
| LRPPRC       | -1492 | -1486 | + | 5.83 | CTGGCA |
| SLC3A1       | -1460 | -1454 | + | 6.73 | TTGGCA |
| TMX4         | -1500 | -1494 | - | 5.83 | TGCCAG |
| C25H9orf43   | -1443 | -1437 | + | 5.91 | TTGGCT |
| DESI2        | -1490 | -1484 | + | 5.83 | CTGGCA |
| H.R.PU       | -1425 | -1419 | - | 5.83 | TGCCAG |

7 MA0104.2 Mycn 11.1040870395 0.698630136997 -617:-448  
2.92984293472e-09

list of hits

|              |       |      |   |      |            |
|--------------|-------|------|---|------|------------|
| XP.PEP1      | -0600 | -590 | - | 5.70 | GCCACGTTCC |
| KAT6B        | -0538 | -528 | - | 6.05 | GGCATGTGGG |
| VDAC2        | -0606 | -596 | + | 7.42 | CCCACGCGGG |
| DUPD1        | -0544 | -534 | + | 5.80 | TCCACGTGAT |
| LOC100068320 | -0558 | -548 | - | 6.05 | GGCATGTGGG |
| CPE          | -0482 | -472 | + | 6.63 | TTCACGTGGT |
| FOXO3        | -0616 | -606 | - | 5.97 | GCCCCGTGCG |
| PPIL6        | -0510 | -500 | + | 6.64 | GGCACGCGGG |
| SMPD2        | -0466 | -456 | + | 6.17 | ACCGCGCGGC |
| CD164        | -0489 | -479 | + | 6.06 | GTCACGTGGG |
| USP36        | -0487 | -477 | + | 6.72 | CCCACGTGCG |
| CYTH1        | -0544 | -534 | - | 5.82 | GCAGCGTGCC |
| CYTH1        | -0479 | -469 | - | 5.69 | CGCGCGTGCG |
| AFMID        | -0617 | -607 | + | 5.79 | ACCACGGGGC |
| AFMID        | -0568 | -558 | - | 5.56 | GCCACGTTGA |
| GG.BP2       | -0552 | -542 | + | 6.20 | CCCGCGCGGC |
| AATF         | -0471 | -461 | + | 7.67 | TCCACGTGCC |

|            |       |       |      |      |                 |
|------------|-------|-------|------|------|-----------------|
| ACACA      | -0592 | -582  | +    | 7.37 | CCCGCGTGCC      |
| ACACA      | -0450 | -440  | -    | 7.15 | GCCTCGTGCC      |
| C15H2orf73 |       | -0559 | -549 | -    | 6.20 GCCGCGCGGG |
| KC.S3      | -0586 | -576  | -    | 5.95 | GCCACATGCC      |
| GE.1       | -0490 | -480  | -    | 5.69 | CGCGCGTGCG      |
| ODC1       | -0604 | -594  | -    | 6.10 | TGCGCGTGCG      |
| HPCAL1     | -0510 | -500  | +    | 5.92 | CCCGCGTGGA      |
| KLF11      | -0511 | -501  | +    | 7.09 | AACACGTGCC      |
| KLF11      | -0462 | -452  | +    | 7.63 | ATCACGCGGC      |
| GRHL1      | -0498 | -488  | +    | 6.91 | GCCACGCGGA      |
| GRHL1      | -0483 | -473  | +    | 6.91 | GCCACGCGGA      |
| ADAM17     | -0593 | -583  | +    | 7.55 | CGCACGCGCC      |
| DCDC2C     | -0590 | -580  | -    | 6.48 | GCCACGTTGG      |
| RYBP       | -0587 | -577  | -    | 5.65 | GGCACGCGCG      |
| PROK2      | -0520 | -510  | +    | 9.10 | AGCACGTGGA      |
| PROK2      | -0455 | -445  | -    | 7.55 | GGCGCGTGCG      |
| ZFP37      | -0572 | -562  | +    | 8.96 | AACACGTGGC      |
| CDC26      | -0521 | -511  | -    | 5.80 | GGCGCGTGAG      |
| ALAD       | -0459 | -449  | +    | 7.42 | CCCGCGCGGG      |
| COL27A1    | -0587 | -577  | +    | 6.91 | TCCACGCGGA      |
| COL27A1    | -0530 | -520  | +    | 6.50 | TCCACGCGCC      |
| AK.A       | -0612 | -602  | +    | 8.59 | CCCGCGTGGG      |
| AK.A       | -0599 | -589  | +    | 5.55 | CCCGCGCGCG      |
| TEX48      | -0568 | -558  | +    | 5.68 | GCCACGCTGC      |
| GRSF1      | -0548 | -538  | +    | 6.13 | GCCACGTGTT      |
| COL11A1    | -0617 | -607  | +    | 7.27 | AGCACGCGTC      |
| SQLE       | -0448 | -438  | -    | 5.59 | GCCGCGTGCG      |
| .SMCE2     | -0487 | -477  | +    | 6.10 | CGCACGCGCA      |
| TRIB1      | -0573 | -563  | -    | 5.84 | GCCACCTGCA      |
| PREPL      | -0465 | -455  | +    | 6.56 | ACCACGCTGC      |
| KLHL29     | -0601 | -591  | -    | 7.52 | GCCACGCGCG      |
| PLCB1      | -0569 | -559  | +    | 5.70 | GGAACGTGGC      |
| TMX4       | -0489 | -479  | +    | 5.96 | CACACGCGCC      |
| TMX4       | -0455 | -445  | +    | 6.54 | CACACGCGGT      |
| C25H9orf43 |       | -0567 | -557 | +    | 6.15 CTCACGTTGC |
| COX20      | -0600 | -590  | +    | 6.35 | CGCGCGCGGC      |
| COX20      | -0485 | -475  | -    | 7.88 | GCCATGTGGT      |
| ZBTB18     | -0478 | -468  | -    | 9.42 | GCCGCGTGCG      |

8 MA0147.1 Myc 11.157239362 0.685903085415 -617:-455  
3.06174041938e-09

## list of hits

|              |       |       |      |      |                  |
|--------------|-------|-------|------|------|------------------|
| DUSP5        | -0467 | -457  | +    | 5.91 | AGCACACGGA       |
| XP.PEP1      | -0600 | -590  | -    | 6.63 | GCCACGTTCC       |
| KAT6B        | -0538 | -528  | +    | 5.57 | GGCATGTGGG       |
| VDAC2        | -0606 | -596  | +    | 7.11 | CCCGCGCGGG       |
| DUPD1        | -0544 | -534  | -    | 7.11 | TCCACGTGAT       |
| LOC100068320 |       | -0558 | -548 | +    | 5.57 GGCATGTGGG  |
| CPE          | -0482 | -472  | +    | 6.37 | TTCACGTGGT       |
| APELA        | -0605 | -595  | +    | 5.32 | TGCATGTGGG       |
| LOC106780946 |       | -0460 | -450 | +    | 5.61 CGCCCCGCGGC |
| PPIL6        | -0510 | -500  | +    | 7.03 | GGCACGCGGG       |
| CD164        | -0489 | -479  | +    | 5.88 | GTCACGTGGG       |
| TIMP2        | -0488 | -478  | -    | 6.46 | GCCAGGTGCG       |
| USP36        | -0487 | -477  | +    | 6.13 | CCCGCGTGCG       |
| CYTH1        | -0544 | -534  | -    | 5.39 | GCAGCGTGCC       |
| CYTH1        | -0479 | -469  | -    | 5.65 | CGCGCGTGCG       |
| SOCS3        | -0547 | -537  | +    | 5.61 | CGCCCCGCGGC      |
| AFMID        | -0568 | -558  | -    | 5.49 | GCCACGTTGA       |
| MYO19        | -0574 | -564  | -    | 6.11 | GCCAGGTGCT       |
| LHX1         | -0531 | -521  | -    | 6.01 | GCCACGGGCC       |
| LHX1         | -0485 | -475  | +    | 6.46 | CGCACCTGGC       |
| AATF         | -0471 | -461  | +    | 6.39 | TCCACGTGCC       |
| ACACA        | -0592 | -582  | +    | 6.28 | CCCGCGTGCC       |
| KC.S3        | -0586 | -576  | -    | 7.04 | GCCACATGCC       |
| GE.1         | -0490 | -480  | -    | 5.65 | CGCGCGTGCG       |
| ODC1         | -0604 | -594  | -    | 6.27 | TGCGCGTGCG       |
| HPCAL1       | -0510 | -500  | +    | 5.43 | CCCGCGTGGA       |
| KLF11        | -0511 | -501  | +    | 6.81 | AACACGTGCC       |

|              |       |      |   |      |            |
|--------------|-------|------|---|------|------------|
| KLF11        | -0462 | -452 | + | 6.60 | ATCACGCGGC |
| GRHL1        | -0498 | -488 | + | 6.76 | GCCACGCGGA |
| GRHL1        | -0483 | -473 | + | 6.76 | GCCACGCGGA |
| YWHAQ        | -0476 | -466 | + | 5.73 | ACCCCGTGGC |
| ADAM17       | -0593 | -583 | + | 7.13 | CGCACGCGCC |
| DCDC2C       | -0590 | -580 | - | 6.71 | GCCACGTTGG |
| MIR9170      | -0544 | -534 | + | 5.49 | GGCACTTGGC |
| PROK2        | -0520 | -510 | + | 9.63 | AGCACGTGGA |
| PROK2        | -0455 | -445 | - | 7.13 | GGCGCGTGCG |
| ISM1         | -0616 | -606 | - | 5.80 | CCCATGTGCA |
| ZFP37        | -0572 | -562 | + | 9.16 | AACACGTGGC |
| ALAD         | -0459 | -449 | + | 7.11 | CCCACGCGGG |
| COL27A1      | -0587 | -577 | + | 6.51 | TCCACGCGGA |
| AK.A         | -0612 | -602 | + | 8.47 | CCCACGTGGG |
| AK.A         | -0599 | -589 | - | 5.70 | CCCACGCGCG |
| LOC100050034 | -0496 | -486 | - | 5.47 | TCCACATGTT |
| LOC100051562 | -0512 | -502 | - | 5.47 | TCCACATGTT |
| LOC100050100 | -0501 | -491 | - | 5.47 | TCCACATGTT |
| GRSF1        | -0548 | -538 | + | 6.35 | GCCACGTGTT |
| JCHAI.       | -0539 | -529 | + | 5.91 | AAAACGTGGC |
| COL11A1      | -0617 | -607 | + | 7.22 | AGCACGCGTC |
| .SMCE2       | -0487 | -477 | + | 6.27 | CGCACGCGCA |
| TRIB1        | -0573 | -563 | - | 5.54 | GCCACCTGCA |
| KLHL29       | -0601 | -591 | - | 7.18 | GCCACGCGCG |
| PLCB1        | -0569 | -559 | + | 6.63 | GGAACGTGGC |
| TMX4         | -0489 | -479 | + | 5.80 | CACACGCGCC |
| TMX4         | -0455 | -445 | + | 7.41 | CACACGCGGT |
| COX20        | -0600 | -590 | + | 5.81 | CGCGCGCGGC |
| COX20        | -0485 | -475 | + | 5.42 | GCCATGTGGT |
| ZBTB18       | -0478 | -468 | - | 9.48 | GCCGCGTGCG |

9 MA0003.1 TFAP2A 7.8120920509 0.800000024164 -668:-633  
8.14016173123e-08

## list of hits

|              |       |      |   |      |            |
|--------------|-------|------|---|------|------------|
| DUSP5        | -0653 | -644 | + | 6.45 | GCCCCCAGC  |
| RBM20        | -0658 | -649 | + | 7.05 | GCCCTAGGG  |
| ADK          | -0652 | -643 | + | 6.28 | GCCGTGAGG  |
| COMTD1       | -0648 | -639 | + | 7.22 | GCCCCAGGG  |
| LOC100067994 | -0661 | -652 | - | 6.11 | GCGTGCGGC  |
| LOC106780946 | -0664 | -655 | - | 6.39 | GCCGACGGC  |
| LOC106780946 | -0638 | -629 | - | 6.45 | CCTCGCGGC  |
| FOXO3        | -0661 | -652 | + | 7.25 | GCCCTGGGG  |
| SES.1        | -0653 | -644 | + | 6.31 | GCCCCGCGC  |
| CEP57L1      | -0642 | -633 | - | 6.31 | GCGCGGGGC  |
| AK9          | -0664 | -655 | - | 6.62 | CCCTACGGC  |
| CYTH1        | -0667 | -658 | + | 6.87 | GCCCCGAGC  |
| SOC3         | -0658 | -649 | + | 6.57 | GCCGCCGGG  |
| SOC3         | -0637 | -628 | - | 6.64 | CCCGCCGGC  |
| CA4          | -0644 | -635 | + | 6.86 | GCCGGAGGG  |
| ACACA        | -0647 | -638 | + | 6.99 | GCCGCGGGG  |
| ACACA        | -0634 | -625 | + | 6.34 | GCCCAGGGG  |
| SPTB.1       | -0663 | -654 | + | 7.29 | GCCCGAGGG  |
| ASB3         | -0656 | -647 | + | 6.32 | GCCTGAAGG  |
| PSME4        | -0668 | -659 | + | 7.00 | GCCCCCGGG  |
| GE.1         | -0645 | -636 | - | 6.47 | CCTGGGGGC  |
| ODC1         | -0643 | -634 | + | 6.51 | GCCTGGAGC  |
| HPCAL1       | -0658 | -649 | + | 6.57 | GCCTCCGGG  |
| HPCAL1       | -0638 | -629 | - | 6.64 | CCCGCAGGC  |
| RRM2         | -0667 | -658 | + | 6.64 | GCCGGCGGG  |
| GRHL1        | -0652 | -643 | - | 6.82 | GCCGAGGGC  |
| CYS1         | -0663 | -654 | + | 6.16 | GCCCCCTGGC |
| CYS1         | -0651 | -642 | + | 6.99 | GCCCCCGGC  |
| DCDC2C       | -0642 | -633 | + | 6.79 | GCCGCAGGG  |
| DIPK2A       | -0665 | -656 | - | 6.64 | CCCGCCGGC  |
| DIPK2A       | -0653 | -644 | + | 6.99 | GCCCCCGGC  |
| SLC31A2      | -0633 | -624 | + | 7.04 | GCCTGGGGC  |
| AK.A         | -0657 | -648 | + | 6.64 | GCCGGCGGG  |
| DCK          | -0640 | -631 | - | 6.52 | CCTCCAGGC  |
| TRIB1        | -0660 | -651 | + | 7.41 | GCCCCGGGC  |



|            |       |       |      |      |                |
|------------|-------|-------|------|------|----------------|
| TRIB1      | -0649 | -640  | +    | 6.86 | GCCGGAGGG      |
| C25H9orf43 |       | -0650 | -641 | +    | 6.78 GCCTCAGGC |
| COX20      | -0634 | -625  | -    | 7.07 | CCCGCGGGC      |

10 MA0076.1 ELK4 14.1232301212 0.5833333336645 -345:-246  
1.34472905636e-07

list of hits

|              |       |       |      |       |                |
|--------------|-------|-------|------|-------|----------------|
| SAMD8        | -0342 | -333  | -    | 5.68  | CCTTCCGGT      |
| SAMD8        | -0271 | -262  | -    | 8.59  | AGTTCCGGT      |
| S.X3         | -0311 | -302  | +    | 5.76  | GCCGGAACC      |
| OSTM1        | -0279 | -270  | +    | 8.42  | GCCGGAAGC      |
| ZBTB24       | -0289 | -280  | -    | 7.75  | GCTTCCGGG      |
| FIG4         | -0309 | -300  | +    | 6.44  | TCCGGAAC       |
| AK9          | -0255 | -246  | +    | 5.09  | CCCGGAACC      |
| USP36        | -0247 | -238  | -    | 5.73  | GTATCCGGC      |
| TMEM235      | -0307 | -298  | +    | 5.09  | CCCGGAACC      |
| AATF         | -0296 | -287  | +    | 8.52  | CCCGGAAGT      |
| CHAC2        | -0345 | -336  | +    | 5.36  | GCCGGAACAA     |
| CHAC2        | -0263 | -254  | -    | 3.88  | ACAGCCGGT      |
| ERLEC1       | -0341 | -332  | +    | 7.14  | CCCGGATGT      |
| ERLEC1       | -0317 | -308  | +    | 6.44  | CCCGGAAC       |
| C15H2orf73   |       | -0254 | -245 | -     | 4.69 TTTTCCGGG |
| RDH14        | -0277 | -268  | +    | 8.52  | CCCGGAAGT      |
| LOC100056590 |       | -0249 | -240 | +     | 3.94 ACAGGAAAT |
| .OL10        | -0332 | -323  | -    | 6.00  | TCTTCCGGG      |
| .OL10        | -0314 | -305  | -    | 7.11  | GTTTCCGGC      |
| .OL10        | -0304 | -295  | +    | 8.52  | CCCGGAAGT      |
| ADAM17       | -0327 | -318  | +    | 8.42  | GCCGGAAGC      |
| ADAM17       | -0286 | -277  | -    | 7.75  | GCTTCCGGG      |
| ADAM17       | -0255 | -246  | -    | 8.73  | TCTTCCGGT      |
| RPS7         | -0259 | -250  | -    | 8.73  | TCTTCCGGT      |
| TRAPPC12     |       | -0345 | -336 | +     | 9.17 ACCGGAAC  |
| SHQ1         | -0289 | -280  | +    | 8.42  | GCCGGAAGC      |
| TASP1        | -0333 | -324  | -    | 8.42  | GCTTCCGGC      |
| TASP1        | -0247 | -238  | -    | 11.25 | ACTTCCGGT      |
| LOC100034197 |       | -0282 | -273 | -     | 5.25 ACTCCCGGT |
| LOC100056127 |       | -0257 | -248 | -     | 5.25 ACTCCCGGT |
| FKBP15       | -0286 | -277  | -    | 3.88  | ACATCCCGT      |
| PRPF4        | -0320 | -311  | +    | 3.94  | ACCGCAAAT      |
| ALAD         | -0246 | -237  | -    | 7.75  | GCTTCCGGG      |
| LOC100050034 |       | -0337 | -328 | +     | 4.31 ACCGGATGG |
| LOC100050034 |       | -0276 | -267 | -     | 5.25 ACTTCCGTT |
| LOC100050100 |       | -0342 | -333 | +     | 7.35 ACCGGATGA |
| LOC100050100 |       | -0281 | -272 | -     | 5.25 ACTTCCGTT |
| UTP3         | -0304 | -295  | +    | 4.77  | ACCGGAATC      |
| CAMKMT       | -0301 | -292  | +    | 9.94  | ACCGGAAAT      |
| ABCG5        | -0296 | -287  | -    | 4.01  | TGTTCCGGC      |

11 MA0162.1 Egr1 14.4555832005 0.739393945445 -663:-597  
8.5752756276e-07

list of hits

|              |       |       |      |      |                   |
|--------------|-------|-------|------|------|-------------------|
| KLHL2        | -0626 | -615  | -    | 4.02 | CCGCTCCCGGC       |
| LOC100067994 |       | -0641 | -630 | +    | 4.65 ACTGGGGGTGG  |
| LOC106780946 |       | -0601 | -590 | +    | 8.52 CGCGGGGCGA   |
| TMEM200C     |       | -0654 | -643 | +    | 6.59 TGCGAGGCGG   |
| TMEM200C     |       | -0617 | -606 | -    | 6.04 CCGCCCTCGCG  |
| FOXO3        | -0632 | -621  | +    | 7.48 | GGCGGGGAGG        |
| LOC102147786 |       | -0612 | -601 | +    | 4.78 TGCCCTGGGAGG |
| CYTH1        | -0626 | -615  | +    | 9.06 | CGCGGAGGCGG       |
| AFMID        | -0633 | -622  | -    | 6.50 | CCACCCCGGT        |
| ACACA        | -0604 | -593  | -    | 7.54 | CCTCCCCACA        |
| USP32        | -0651 | -640  | +    | 9.95 | CGTGTGGGCGG       |
| USP32        | -0602 | -591  | +    | 6.04 | CGCGGGGCGG        |
| SPTB.1       | -0632 | -621  | +    | 6.51 | TGGGTGGGCGG       |
| PSME4        | -0610 | -599  | -    | 4.73 | CCTCCTCCGGT       |
| ERLEC1       | -0617 | -606  | -    | 7.06 | CCGCTCACACT       |
| C15H2orf73   |       | -0605 | -594 | +    | 4.44 CGCCGGGGCGG  |
| GE.1         | -0645 | -634  | +    | 6.13 | CCTGGGGGCGT       |
| SMC6         | -0626 | -615  | -    | 6.44 | TCTCCACACG        |

|              |       |       |      |       |                   |
|--------------|-------|-------|------|-------|-------------------|
| ODC1         | -0654 | -643  | +    | 5.88  | CGCGTGCGCGG       |
| ODC1         | -0602 | -591  | +    | 5.88  | CGCGTGCGCGT       |
| HPCAL1       | -0660 | -649  | -    | 6.60  | CCGCCCTCCGGG      |
| KLF11        | -0600 | -589  | -    | 10.43 | CCGCCCCCGCG       |
| GRHL1        | -0662 | -651  | +    | 4.18  | CAAGTGGGCGG       |
| YWHAQ        | -0614 | -603  | +    | 6.63  | CGCGGGAGTGG       |
| CYS1         | -0653 | -642  | -    | 6.62  | CCGCCCCCGGC       |
| ADI1         | -0661 | -650  | -    | 8.37  | CCGCCCCCGTT       |
| ADI1         | -0634 | -623  | -    | 6.10  | ACACCCCCGTC       |
| TRAPPC12     |       | -0612 | -601 | +     | 4.78 TGC GTGGCAGG |
| PROK2        | -0630 | -619  | -    | 6.79  | ACACCCCCGGG       |
| DIPK2A       | -0655 | -644  | -    | 6.62  | CCGCCCCCGGC       |
| ISM1         | -0659 | -648  | -    | 7.54  | CCGCTCCCGCT       |
| LOC100034197 |       | -0662 | -651 | +     | 4.21 GATGTGAGCGT  |
| LOC100056127 |       | -0638 | -627 | +     | 4.21 GATGTGAGCGG  |
| AK.A         | -0615 | -604  | -    | 6.52  | TCTCCACGTG        |
| LOC100051420 |       | -0597 | -586 | -     | 7.48 CCTCCCCCGCC  |
| LOC100050034 |       | -0661 | -650 | -     | 4.11 TCACCCCCACC  |
| LOC100051562 |       | -0663 | -652 | -     | 7.48 CCTCCCCCGCC  |
| LOC100050100 |       | -0652 | -641 | -     | 5.62 CCTCCCCCACC  |
| TRIB1        | -0613 | -602  | +    | 7.98  | CCCGGGGGCGT       |
| ABCG5        | -0618 | -607  | -    | 4.74  | CCACTTACGGA       |
| C25H9orf43   |       | -0658 | -647 | -     | 4.59 TCACCTCCGCC  |
| C30H1orf100  |       | -0597 | -586 | -     | 4.78 CCACTCCCACG  |

12 MA0109.1 Hltf 7.46926527425 0.397046551108 -2165:-2133  
1.72088122308e-06

## list of hits

|              |       |       |       |      |                 |
|--------------|-------|-------|-------|------|-----------------|
| DUSP5        | -2164 | -2154 | +     | 5.70 | GCCCTTATCA      |
| LOC100068208 |       | -2149 | -2139 | +    | 6.18 AACCATATGC |
| LOC100068320 |       | -2138 | -2128 | -    | 5.98 TCATAAGGAC |
| MSMO1        | -2156 | -2146 | +     | 5.61 | ATACATATAG      |
| LOC100066472 |       | -2155 | -2145 | +    | 5.73 ATCCATAGAT |
| LOC100066472 |       | -2141 | -2131 | -    | 5.78 GGATAAGGGA |
| LOC100068026 |       | -2154 | -2144 | +    | 5.84 TTCCTTTTAC |
| LOC100068026 |       | -2154 | -2144 | +    | 5.84 TTCCTTTTAC |
| MICAL1       | -2147 | -2137 | +     | 5.66 | GAACATATCC      |
| WASF1        | -2145 | -2135 | -     | 5.75 | ACCTAAGTTA      |
| CA.T1        | -2134 | -2124 | +     | 5.76 | AACCTTATTG      |
| CYTH1        | -2162 | -2152 | -     | 5.92 | TGAAAAGGTC      |
| C15H2orf73   |       | -2164 | -2154 | +    | 5.68 TAACATTTGT |
| GE.1         | -2144 | -2134 | +     | 5.75 | TAACCTTAGGT     |
| TRAPPC12     |       | -2154 | -2144 | +    | 5.66 ACACATATGT |
| DCDC2C       | -2140 | -2130 | +     | 5.74 | ATACTTTTGC      |
| GXYLT2       | -2156 | -2146 | +     | 5.68 | GTACTTTTCT      |
| SHQ1         | -2163 | -2153 | +     | 5.76 | GACCTTAGAA      |
| GXYLT2       | -2156 | -2146 | +     | 5.68 | GTACTTTTCT      |
| LOC100034197 |       | -2133 | -2123 | -    | 6.38 CTATAAGGTT |
| LOC100056127 |       | -2156 | -2146 | +    | 5.81 TAACATATAC |
| CDC26        | -2165 | -2155 | +     | 5.75 | ACACTTTTAT      |
| PRPF4        | -2157 | -2147 | -     | 5.87 | CTAAAAGGAT      |
| POLE3        | -2156 | -2146 | +     | 5.63 | ATCCATATTT      |
| Z.F618       | -2165 | -2155 | -     | 5.69 | GCCTAAGGTC      |
| ATP6V1G1     |       | -2151 | -2141 | +    | 5.77 ACCCTTTTAA |
| LOC100051420 |       | -2134 | -2124 | -    | 6.38 CTATAAGGTT |
| RUFY3        | -2136 | -2126 | -     | 5.81 | GTAAAAGGTC      |
| DY.C2LI1     |       | -2150 | -2140 | -    | 5.71 AGAAAAGGGA |
| ABCG5        | -2138 | -2128 | +     | 5.80 | AACCTTGTC       |
| PREPL        | -2153 | -2143 | -     | 5.85 | CTAAAAGTTT      |
| PREPL        | -2143 | -2133 | -     | 5.66 | GCAAATGTTT      |
| PLCB1        | -2146 | -2136 | +     | 5.66 | TTCCTTTTAC      |
| C25H9orf43   |       | -2155 | -2145 | +    | 6.17 AAACATATGT |

13 MA0056.1 MZF1\_1-4 8.58551308885 0.724999990314 -2180:-2114  
2.89031386155e-06

## list of hits

|        |       |       |   |      |        |
|--------|-------|-------|---|------|--------|
| ADD3   | -2167 | -2161 | - | 7.05 | TCCCCA |
| KAT6B  | -2118 | -2112 | + | 7.05 | TGGGGA |
| DUSP13 | -2169 | -2163 | - | 7.05 | TCCCCA |

|              |       |       |   |      |        |  |
|--------------|-------|-------|---|------|--------|--|
| COMTD1       | -2155 | -2149 | + | 7.05 | TGGGGA |  |
| LOC100067994 | -2157 | -2151 | + | 7.05 | TGGGGA |  |
| LOC100146977 | -2156 | -2150 | - | 7.05 | TCCCCA |  |
| FOXO3        | -2114 | -2108 | + | 7.05 | TGGGGA |  |
| FIG4         | -2129 | -2123 | - | 7.05 | TCCCCA |  |
| RBFOX3       | -2174 | -2168 | - | 7.05 | TCCCCA |  |
| D.AH17       | -2136 | -2130 | - | 7.05 | TCCCCA |  |
| CA4          | -2145 | -2139 | - | 7.05 | TCCCCA |  |
| SPTB.1       | -2151 | -2145 | + | 7.05 | TGGGGA |  |
| SPTB.1       | -2140 | -2134 | + | 7.05 | TGGGGA |  |
| CHAC2        | -2172 | -2166 | + | 7.05 | TGGGGA |  |
| CHAC2        | -2162 | -2156 | + | 7.05 | TGGGGA |  |
| KC.S3        | -2133 | -2127 | + | 7.05 | TGGGGA |  |
| RDH14        | -2180 | -2174 | - | 7.05 | TCCCCA |  |
| .OL10        | -2119 | -2113 | + | 7.05 | TGGGGA |  |
| GRHL1        | -2158 | -2152 | - | 7.05 | TCCCCA |  |
| YWHAQ        | -2139 | -2133 | + | 7.05 | TGGGGA |  |
| CYS1         | -2173 | -2167 | + | 7.05 | TGGGGA |  |
| CYS1         | -2126 | -2120 | - | 7.05 | TCCCCA |  |
| PPP4R2       | -2175 | -2169 | - | 7.05 | TCCCCA |  |
| BSPRY        | -2143 | -2137 | - | 7.05 | TCCCCA |  |
| KIF12        | -2134 | -2128 | + | 7.05 | TGGGGA |  |
| COL27A1      | -2119 | -2113 | - | 7.05 | TCCCCA |  |
| T.FSF8       | -2180 | -2174 | + | 7.05 | TGGGGA |  |
| TEX48        | -2158 | -2152 | - | 7.05 | TCCCCA |  |
| GRSF1        | -2135 | -2129 | - | 7.05 | TCCCCA |  |
| TRIB1        | -2165 | -2159 | - | 7.05 | TCCCCA |  |
| TRIB1        | -2116 | -2110 | + | 7.05 | TGGGGA |  |
| C25H9orf43   | -2174 | -2168 | + | 7.05 | TGGGGA |  |

14 MA0004.1 Arnt 10.9916749403 0.641666668778 -2118:-1953  
9.70150131415e-06

list of hits

|              |       |       |   |      |        |  |
|--------------|-------|-------|---|------|--------|--|
| LOC100067994 | -2112 | -2106 | - | 6.62 | CACGTT |  |
| S.X3         | -1953 | -1947 | - | 6.62 | CACGTT |  |
| METTL24      | -2118 | -2112 | + | 8.00 | CACGTG |  |
| DDO          | -2085 | -2079 | + | 8.00 | CACGTG |  |
| RBFOX3       | -2046 | -2040 | + | 6.62 | AACGTG |  |
| LGALS3BP     | -2084 | -2078 | - | 6.62 | CACGTT |  |
| LGALS3BP     | -2077 | -2071 | - | 6.62 | CACGTT |  |
| TIMP2        | -2051 | -2045 | + | 6.62 | AACGTG |  |
| CYTH1        | -2072 | -2066 | + | 6.62 | AACGTG |  |
| MRM1         | -2029 | -2023 | + | 8.00 | CACGTG |  |
| KC.S3        | -2011 | -2005 | + | 8.00 | CACGTG |  |
| ODC1         | -2110 | -2104 | + | 8.00 | CACGTG |  |
| RRM2         | -2013 | -2007 | + | 8.00 | CACGTG |  |
| TASP1        | -1961 | -1955 | + | 6.62 | AACGTG |  |
| LOC100056127 | -2028 | -2022 | + | 6.62 | AACGTG |  |
| HDHD3        | -1962 | -1956 | - | 6.62 | CACGTT |  |
| RGS3         | -1976 | -1970 | + | 6.62 | AACGTG |  |
| KIF12        | -2044 | -2038 | - | 6.62 | CACGTT |  |
| WASHC5       | -2079 | -2073 | + | 6.62 | AACGTG |  |
| ABCG8        | -2028 | -2022 | - | 6.62 | CACGTT |  |
| ABCG8        | -2017 | -2011 | + | 6.62 | AACGTG |  |
| PREPL        | -1987 | -1981 | + | 6.62 | AACGTG |  |
| COX20        | -2092 | -2086 | + | 6.62 | AACGTG |  |

15 MA0035.2 Gata1 10.8778685237 0.372818182556 -2790:-2747  
1.03175348622e-05

list of hits

|              |       |       |   |      |             |  |
|--------------|-------|-------|---|------|-------------|--|
| XP.PEP1      | -2786 | -2775 | + | 7.06 | GGTGATAAGTG |  |
| VDAC2        | -2780 | -2769 | + | 6.12 | GGAGATAGAGG |  |
| DUPD1        | -2749 | -2738 | - | 8.50 | CTCTTATCTAT |  |
| LOC100061588 | -2773 | -2762 | - | 6.50 | CTTTTATCATA |  |
| LOC100066359 | -2756 | -2745 | + | 8.65 | TAAGATAAGGA |  |
| EPB41L3      | -2752 | -2741 | - | 7.30 | CTGTTATCTAT |  |
| RIT2         | -2761 | -2750 | + | 8.11 | CCAGATAAAGA |  |
| SYT4         | -2790 | -2779 | - | 8.32 | CCCTTATCAGA |  |
| FIG4         | -2748 | -2737 | + | 8.30 | CCTGATAAGGA |  |

|               |       |       |      |             |             |
|---------------|-------|-------|------|-------------|-------------|
| SLC22A16      | -2758 | -2747 | -    | 7.19        | TTGTTATCACA |
| ClQT.F1 -2771 | -2760 | -     | 6.35 | TTCTAATCTCT |             |
| C15H2orf73    | -2752 | -2741 | -    | 8.36        | TTCTTATCAGG |
| ADAM17 -2785  | -2774 | -     | 8.62 | TCTTTATCTCC |             |
| ADAM17 -2761  | -2750 | -     | 7.19 | TGTTTATCTTA |             |
| SHQ1 -2788    | -2777 | -     | 8.62 | TGTTTATCTGT |             |
| PROK2 -2748   | -2737 | +     | 6.18 | CAAGATAGGAA |             |
| SPTLC3 -2748  | -2737 | +     | 6.41 | ACTGATAATAC |             |
| RGS3 -2754    | -2743 | -     | 5.95 | ACATTATCTGG |             |
| GRSF1 -2785   | -2774 | -     | 7.76 | TCCTTATCAAC |             |
| LOC100049851  | -2779 | -2768 | +    | 6.82        | TGAGATAAACT |
| SQLE -2747    | -2736 | -     | 6.41 | GTATTATCAGT |             |
| WASHC5 -2787  | -2776 | -     | 6.70 | TATTTATCTCA |             |
| .SMCE2 -2759  | -2748 | +     | 6.12 | TAAGATAATAG |             |
| PPM1B -2763   | -2752 | -     | 8.11 | TCTTTATCTGG |             |
| TMX4 -2785    | -2774 | -     | 6.70 | TATTTATCTCA |             |

16 MA0048.1 NHLH1 14.131557299 0.674382714037 -244:-211  
1.38923056368e-05

## list of hits

|               |       |      |      |              |              |
|---------------|-------|------|------|--------------|--------------|
| XP.PEP1 -0231 | -219  | +    | 7.69 | GATCAGCTGGTC |              |
| SMC3 -0212    | -200  | +    | 5.65 | AAGCAGGTGAGG |              |
| ADK -0219     | -207  | +    | 8.43 | CAGCAGCTGAGG |              |
| KAT6B -0243   | -231  | +    | 4.95 | GGGCAGCTTCTC |              |
| SAMD8 -0242   | -230  | -    | 6.94 | GCGCGGCTGAGA |              |
| VDAC2 -0213   | -201  | +    | 9.13 | CCGCAGCTGCAG |              |
| TMEM192 -0214 | -202  | +    | 5.11 | GCGCAGGTGGAG |              |
| LOC100066444  | -0229 | -217 | -    | 5.93         | CTACAGCTGAGT |
| S.X3 -0231    | -219  | +    | 5.42 | TCTCAGCCGGGC |              |
| ZBTB24 -0244  | -232  | +    | 5.53 | CAGAAGCTGGGG |              |
| METTL24 -0233 | -221  | +    | 5.71 | GCGCTGCTGCTC |              |
| CYTH1 -0230   | -218  | +    | 4.60 | GGCCAGGTGCGG |              |
| ACACA -0236   | -224  | -    | 4.95 | GAGCAGCTTCCC |              |
| ACYP2 -0219   | -207  | +    | 4.74 | CCCCAGCTGCCC |              |
| VS.L1 -0215   | -203  | -    | 6.00 | GCGCGCCTGCGC |              |
| LOC100034197  | -0239 | -227 | -    | 4.70         | ATGAAGCTGCTG |
| LOC100056127  | -0214 | -202 | -    | 4.70         | ATGAAGCTGCTG |
| SLC31A2 -0211 | -199  | +    | 7.32 | GAGAAGCTGCGG |              |
| AMBP -0241    | -229  | +    | 5.31 | TCTCAGCTGCCT |              |
| KIF12 -0224   | -212  | +    | 5.12 | CCGGAGCTGCTG |              |
| ABCG5 -0220   | -208  | +    | 6.87 | GAGCAGGTGGGG |              |
| LRPPRC -0237  | -225  | -    | 5.42 | GCCCTGCTGAGA |              |
| HAO1 -0212    | -200  | +    | 5.48 | ACGCAGCTTTGA |              |
| CATSPERE      | -0238 | -226 | -    | 6.04         | GCGCTGCTGTGG |
| CATSPERE      | -0224 | -212 | +    | 4.88         | GCTGAGCTGCGG |
| DESI2 -0232   | -220  | -    | 4.58 | CCGAGGCTGCGC |              |

17 MA0004.1 Arnt 10.9916749403 0.641666668778 -1132:-1054  
1.65716648912e-05

## list of hits

|               |       |       |      |        |        |
|---------------|-------|-------|------|--------|--------|
| LOC100068208  | -1068 | -1062 | +    | 6.62   | AACGTG |
| LOC100066501  | -1067 | -1061 | +    | 6.62   | AACGTG |
| LOC100067994  | -1054 | -1048 | -    | 6.62   | CACGTT |
| ARMC2 -1114   | -1108 | +     | 6.62 | AACGTG |        |
| CEP57L1 -1066 | -1060 | -     | 6.62 | CACGTT |        |
| AATF -1102    | -1096 | +     | 8.00 | CACGTG |        |
| ODC1 -1116    | -1110 | +     | 6.62 | AACGTG |        |
| SHQ1 -1060    | -1054 | -     | 6.62 | CACGTT |        |
| RYBP -1102    | -1096 | +     | 8.00 | CACGTG |        |
| ALAD -1101    | -1095 | +     | 6.62 | AACGTG |        |
| ALAD -1075    | -1069 | -     | 6.62 | CACGTT |        |
| AMBP -1132    | -1126 | -     | 6.62 | CACGTT |        |
| T.FSF15 -1087 | -1081 | +     | 8.00 | CACGTG |        |
| LOC100051562  | -1126 | -1120 | +    | 6.62   | AACGTG |
| RUFY3 -1095   | -1089 | -     | 6.62 | CACGTT |        |
| LRPPRC -1122  | -1116 | +     | 8.00 | CACGTG |        |

18 MA0032.1 FOXC1 6.50807164809 0.4453125 -2707:-2650  
2.067367994e-05

## list of hits

|              |       |       |   |      |          |
|--------------|-------|-------|---|------|----------|
| ADD3         | -2652 | -2644 | - | 5.72 | TACTTTCC |
| SMC3         | -2668 | -2660 | - | 5.54 | TACTCACG |
| KAT6B        | -2651 | -2643 | + | 5.43 | GGGAAGTA |
| LOC100066472 | -2684 | -2676 | + | 5.54 | GCAAAGTA |
| L3MBTL4      | -2686 | -2678 | - | 5.94 | TACTTACC |
| MICAL1       | -2677 | -2669 | + | 5.72 | GGAAAGTA |
| CA.T1        | -2650 | -2642 | + | 5.54 | AGTGAGTA |
| PIGW         | -2653 | -2645 | - | 5.54 | TACTCACG |
| ACACA        | -2707 | -2699 | - | 5.72 | TACTTACT |
| SPTLC3       | -2662 | -2654 | + | 5.72 | GGCAAGTA |
| CDC26        | -2676 | -2668 | + | 5.50 | AGAAAGTA |
| R.F183       | -2700 | -2692 | - | 5.54 | TACTCACG |
| HDHD3        | -2670 | -2662 | - | 5.54 | TACTTAGT |
| WASHC5       | -2704 | -2696 | - | 5.94 | TACTTACC |
| PPM1B        | -2694 | -2686 | - | 5.72 | TACTTACT |
| SLC3A1       | -2702 | -2694 | - | 5.50 | TACTTGCT |
| COX20        | -2684 | -2676 | + | 5.54 | ACTAAGTA |
| ZBTB18       | -2677 | -2669 | - | 5.50 | TACTTTCT |

19 MA0145.1 Tcfcp2l1 11.6502911816 0.609628129495 -252:-218  
2.15932001258e-05

## list of hits

|              |       |      |   |      |                 |
|--------------|-------|------|---|------|-----------------|
| RBM20        | -0249 | -235 | - | 5.83 | CAGGACCTCACCGG  |
| COMTD1       | -0221 | -207 | + | 6.81 | CCGGCCTCTTCCTG  |
| MSMO1        | -0241 | -227 | - | 5.76 | CTGGGAGAGGCAGG  |
| CPE          | -0232 | -218 | + | 9.16 | GCAGCTCCAGCCAG  |
| D.AH17       | -0223 | -209 | + | 5.87 | CTAGAAGAGGCCAG  |
| MYO19        | -0248 | -234 | - | 5.64 | CTGGAGAAAACCGC  |
| PIGW         | -0227 | -213 | + | 6.05 | CCTGCTCAAGCCTC  |
| GG.BP2       | -0227 | -213 | + | 6.09 | CCCGCCAGGCCAG   |
| DHRS11       | -0229 | -215 | - | 5.94 | CAGGATGGAGCCGG  |
| GE.1         | -0227 | -213 | - | 6.72 | CCGGAAGAGGCAGG  |
| RRM2         | -0245 | -231 | + | 5.97 | CCTGTCTGAACCGC  |
| CYS1         | -0224 | -210 | - | 5.96 | CCGGCGGGGCTGG   |
| GXYLT2       | -0218 | -204 | + | 5.78 | CCTGCTCGCGCTGG  |
| GXYLT2       | -0218 | -204 | + | 5.78 | CCTGCTCGCGCTGG  |
| LOC100034197 | -0243 | -229 | - | 7.30 | CAGGATGAAGCTGC  |
| LOC100056127 | -0218 | -204 | - | 7.30 | CAGGATGAAGCTGC  |
| ALAD         | -0252 | -238 | + | 5.65 | GCAGCTGCTTCCGG  |
| Z.F618       | -0224 | -210 | - | 6.20 | CCGGGAGGAGCAGG  |
| AMBP         | -0235 | -221 | - | 6.63 | CTGCCCTCCAGCAGG |
| T.C          | -0236 | -222 | + | 6.42 | CTGGCCACAGCCTG  |
| RUFY3        | -0229 | -215 | - | 6.98 | CTGGCTCGGACTCG  |
| E.AM         | -0223 | -209 | - | 7.13 | CTGGTACATACAGG  |
| CAMKMT       | -0237 | -223 | - | 7.03 | CAGGTCTTGACAGG  |
| LRPPRC       | -0235 | -221 | + | 7.56 | CCTGCTGAGACCTG  |
| C25H9orf43   | -0246 | -232 | - | 6.67 | GTGGACTGAGCCGG  |
| ADSS2        | -0251 | -237 | - | 6.90 | CCGGCGGGGGCAGG  |

20 MA0125.1 Nobox 9.57325016988 0.25986841647 -3240:-3200  
2.50110282093e-05

## list of hits

|              |       |       |   |      |          |
|--------------|-------|-------|---|------|----------|
| SMC3         | -3218 | -3210 | - | 6.08 | TGCAATTA |
| SAMD8        | -3232 | -3224 | - | 8.20 | ACTAATTA |
| LOC100068320 | -3240 | -3232 | - | 8.20 | ACTAATTA |
| LOC100068041 | -3214 | -3206 | - | 6.71 | AATAATTA |
| AK9          | -3213 | -3205 | + | 8.17 | TAATTGCT |
| SLC22A16     | -3213 | -3205 | + | 7.09 | TAATTGAT |
| DHRS11       | -3239 | -3231 | - | 6.10 | TCTAATTA |
| ACYP2        | -3202 | -3194 | - | 7.09 | AACAATTA |
| CHAC2        | -3209 | -3201 | + | 8.20 | TAATTAGT |
| GPR75        | -3223 | -3215 | + | 7.79 | TAATTACT |
| C15H2orf73   | -3223 | -3215 | - | 7.09 | ATCAATTA |
| YWHAQ        | -3234 | -3226 | - | 8.20 | ACTAATTA |
| DCDC2C       | -3230 | -3222 | + | 6.44 | TAATTAAC |
| WDR31        | -3229 | -3221 | + | 8.31 | TAATTGGC |
| JCHAI.       | -3200 | -3192 | - | 6.71 | ATTAATTA |
| R.PC3        | -3224 | -3216 | - | 6.06 | CTCAATTA |

|        |       |       |   |      |          |
|--------|-------|-------|---|------|----------|
| R.PC3  | -3205 | -3197 | - | 6.82 | GACAATTA |
| CAMKMT | -3200 | -3192 | - | 6.71 | AATAATTA |
| SLC3A1 | -3227 | -3219 | - | 6.06 | CTCAATTA |

21 MA0139.1 CTF 17.2051081365 0.644893727864 -926:-892  
2.55083011703e-05

list of hits

|              |       |      |   |      |                        |
|--------------|-------|------|---|------|------------------------|
| ADK          | -0906 | -887 | - | 7.39 | TACCGCTCCCTTCCGGCCC    |
| LOC100068208 | -0892 | -873 | + | 5.20 | CAACCCCCGGGGGTACAA     |
| LOC100067994 | -0919 | -900 | - | 3.75 | TTGTTCCCACTTGAGGGAG    |
| AFG1L        | -0924 | -905 | - | 4.05 | TGCCAGCCTCTTCTGAACA    |
| FOXO3        | -0918 | -899 | - | 3.47 | GGGGGCCCCCCTCCGCCGGGAG |
| SES.1        | -0907 | -888 | + | 5.50 | AGCCCGCCGGAGGGCGGGG    |
| CEP57L1      | -0924 | -905 | - | 3.09 | CCCCGCCCTCCGCCGCTCC    |
| PPIL6        | -0896 | -877 | + | 4.11 | TCACCAGCAGTTGAGGCTG    |
| CDC40        | -0912 | -893 | - | 5.25 | CGCCGCCCCCACC GCCC     |
| SOC3         | -0917 | -898 | + | 4.41 | GGGCCTCCTGGGGCCGCGA    |
| TMEM235      | -0926 | -907 | + | 4.18 | GGACCAACAGGGGCCCTGCC   |
| AFMID        | -0925 | -906 | + | 7.05 | GGGCCACCGGAGGACAGGG    |
| MRM1         | -0926 | -907 | + | 5.39 | CCCCACTAGGGGCTAGAA     |
| GPR75        | -0904 | -885 | - | 4.12 | CAATTCTTCTGCTGCAAA     |
| MSG.1        | -0905 | -886 | - | 7.30 | CACAGCCACCTTGGGGCTA    |
| ODC1         | -0919 | -900 | + | 4.27 | AGGGCAGAAGGGGCCAGAG    |
| ISM1         | -0892 | -873 | - | 3.90 | GGCCCCCATCTGGAGCCGG    |
| RGS3         | -0920 | -901 | - | 4.47 | GTCTTCCCTCTCTGAGAA     |
| AMBP         | -0895 | -876 | - | 3.96 | CAACTCCACTTCTTGGCTG    |
| AK.A         | -0922 | -903 | + | 4.42 | GATCCTCCAGAGGCCACGC    |
| LOC100050034 | -0904 | -885 | + | 3.77 | TGGACTGTTGAGGACACAG    |
| UTP3         | -0897 | -878 | - | 5.71 | CGGTGCCCTTCTGAGCCAC    |
| SOLE         | -0912 | -893 | - | 5.70 | TCCTTTCTTCTTCTGGCAA    |
| TRIB1        | -0923 | -904 | - | 3.81 | CAGCTCCAACCGGAGGTCC    |
| C25H9orf43   | -0894 | -875 | + | 3.78 | GGCGCGGGAGATGGCGCTC    |
| COX20        | -0903 | -884 | - | 4.31 | CGCGCCCCGCCCTTGGCAC    |

22 MA0062.2 GABPA 13.3349243401 0.647453861192 -570:-532  
2.77112231052e-05

list of hits

|              |       |      |   |       |              |
|--------------|-------|------|---|-------|--------------|
| LOC100061588 | -0542 | -531 | - | 7.49  | GTCACCTTCCTC |
| LOC100068208 | -0568 | -557 | - | 6.53  | GGGGCTTCCTG  |
| KLHL2        | -0545 | -534 | + | 4.73  | GAGGAAGGGGA  |
| SES.1        | -0550 | -539 | + | 5.13  | CCGGAATCGGC  |
| SLC22A16     | -0553 | -542 | + | 4.54  | CCCGAAGCGCC  |
| SLC22A16     | -0542 | -531 | - | 6.53  | GGGGCTTCCTG  |
| CD164        | -0537 | -526 | - | 7.96  | ACAACCTCCGC  |
| CYTH1        | -0553 | -542 | + | 6.04  | CGGGAAGCGGC  |
| DHRS11       | -0568 | -557 | - | 6.08  | TTCTCTTCCTG  |
| PSME4        | -0570 | -559 | + | 11.43 | CCGGAAGTGAC  |
| PSME4        | -0548 | -537 | + | 6.61  | CCGGAACCGCT  |
| KC.S3        | -0548 | -537 | + | 5.02  | GCGGAACCTACA |
| MSG.1        | -0562 | -551 | + | 4.59  | GCGGAAAGGAG  |
| RRM2         | -0537 | -526 | - | 5.34  | GCCGCTCCCGG  |
| COLEC11      | -0559 | -548 | + | 8.64  | CAGGAAGTGGT  |
| TRAPPC12     | -0535 | -524 | + | 4.72  | CAGGAAGAAAA  |
| DCDC2C       | -0567 | -556 | - | 5.07  | CTCCCTTCCGT  |
| RYBP         | -0532 | -521 | - | 4.62  | CCCACGTCCGC  |
| POLE3        | -0563 | -552 | + | 7.29  | CCGAAAAGGC   |
| AMBP         | -0564 | -553 | - | 7.35  | TCAGCTTCCGC  |
| MOB1B        | -0539 | -528 | - | 5.77  | CCCACTTCCTT  |
| GRSF1        | -0544 | -533 | - | 6.52  | CGTGTTTCCGG  |
| E.AM         | -0534 | -523 | - | 5.30  | GTCATTTCTC   |
| CATSPERE     | -0538 | -527 | - | 4.73  | ATCACTTACGG  |
| ZBTB18       | -0570 | -559 | - | 5.00  | GCCGCTTTCGG  |

23 MA0161.1 NFIC 6.98267924778 0.5685040611 -2359:-2329  
2.89684028946e-05

list of hits

|              |       |       |   |      |        |
|--------------|-------|-------|---|------|--------|
| DUSP13       | -2359 | -2353 | - | 6.73 | TGCCAA |
| SMPD2        | -2337 | -2331 | + | 6.73 | TTGGCA |
| LOC102147786 | -2348 | -2342 | + | 6.73 | TTGGCA |

|              |       |       |       |      |             |
|--------------|-------|-------|-------|------|-------------|
| TMEM235      | -2354 | -2348 | -     | 6.73 | TGCCAA      |
| GG.BP2       | -2353 | -2347 | +     | 6.73 | TTGGCA      |
| PSME4        | -2329 | -2323 | +     | 6.73 | TTGGCA      |
| ISM1         | -2354 | -2348 | -     | 6.73 | TGCCAA      |
| ALAD         | -2356 | -2350 | -     | 6.73 | TGCCAA      |
| T.C          | -2357 | -2351 | -     | 6.73 | TGCCAA      |
| GC           | -2348 | -2342 | +     | 6.73 | TTGGCA      |
| LOC100049851 |       | -2339 | -2333 | -    | 6.73 TGCCAA |
| R.PC3        | -2354 | -2348 | -     | 6.73 | TGCCAA      |
| TRIB1        | -2333 | -2327 | +     | 6.73 | TTGGCA      |

24 MA0109.1 Hltf 7.46926527425 0.397046551108 -1917:-1878  
3.04110693034e-05

## list of hits

|              |       |       |       |      |                 |
|--------------|-------|-------|-------|------|-----------------|
| SMC3         | -1882 | -1872 | -     | 6.03 | TCATAAGTAT      |
| RBM20        | -1878 | -1868 | -     | 5.76 | GCATATGGAA      |
| LOC100066444 |       | -1879 | -1869 | +    | 5.97 AACCTTAGGA |
| LOC100066472 |       | -1912 | -1902 | -    | 5.66 ACATATGTGT |
| LOC106780946 |       | -1909 | -1899 | +    | 6.42 AACCTTTTGT |
| CEP57L1      | -1881 | -1871 | +     | 6.11 | TTACTTATAT      |
| ZBTB24       | -1883 | -1873 | +     | 5.88 | AAACATTTGT      |
| E.GASE       | -1906 | -1896 | -     | 5.69 | CTACAAGGTT      |
| LGALS3BP     |       | -1914 | -1904 | +    | 5.66 AAACATTTCC |
| USP36        | -1884 | -1874 | +     | 6.02 | CACCTTATGA      |
| ACACA        | -1917 | -1907 | +     | 5.66 | ATACATTTGT      |
| .OL10        | -1903 | -1893 | -     | 5.77 | ACCTAAGGAA      |
| KLF11        | -1883 | -1873 | +     | 5.73 | AAACATTTAC      |
| ADAM17       | -1889 | -1879 | -     | 5.76 | ATATATGGGA      |
| RPS7         | -1881 | -1871 | +     | 5.76 | TTACTTTTCT      |
| ADI1         | -1901 | -1891 | -     | 5.74 | ACACAAGGTC      |
| PDZR.3       | -1913 | -1903 | +     | 6.27 | AACCTTTTAA      |
| PDZR.3       | -1883 | -1873 | +     | 6.09 | ATCCTTATGG      |
| DIPK2A       | -1907 | -1897 | +     | 5.83 | TCACTTATAT      |
| ZFP37        | -1896 | -1886 | -     | 5.66 | CTAAAAGGAA      |
| PRPF4        | -1901 | -1891 | -     | 5.84 | TTAAAAGGAA      |
| POLE3        | -1888 | -1878 | +     | 5.69 | AACCTTTGGA      |
| POLE3        | -1878 | -1868 | -     | 5.72 | AGACATGGTT      |
| T.FSF8       | -1899 | -1889 | +     | 5.70 | GCCCTTTTAT      |
| T.C          | -1892 | -1882 | -     | 5.68 | TCAAAAGTTC      |
| TEX48        | -1912 | -1902 | -     | 5.79 | ACACAAGTTT      |
| TEX48        | -1888 | -1878 | +     | 6.00 | TTCCTTTTCT      |
| LOC100050100 |       | -1879 | -1869 | +    | 6.00 TTCCTTTTGT |
| GC           | -1907 | -1897 | -     | 5.97 | GGAAAAGTTT      |
| UTP3         | -1899 | -1889 | -     | 5.79 | AGACAAGTTT      |
| SLC4A4       | -1916 | -1906 | +     | 5.80 | AAACTTAGAC      |
| SLC4A4       | -1891 | -1881 | -     | 5.75 | ATAAAAGTAC      |
| LOC100049851 |       | -1891 | -1881 | +    | 5.83 TACCTTAGAA |
| SLC3A1       | -1903 | -1893 | +     | 5.79 | CTCCATATAT      |
| ZBTB18       | -1917 | -1907 | -     | 5.69 | TGCAAAGGTT      |

25 MA0060.1 NFYA 12.9251246242 0.522629311625 -3255:-3198  
3.13629191277e-05

## list of hits

|              |       |       |       |       |                       |
|--------------|-------|-------|-------|-------|-----------------------|
| DUSP13       | -3201 | -3185 | -     | 4.96  | GCTTCCATTGGAGCCT      |
| SAMD8        | -3225 | -3209 | -     | 6.81  | AGGCTTATTGGTCTGT      |
| LOC100068191 |       | -3233 | -3217 | -     | 7.39 GTGTTTATTGGCCATC |
| LOC100066501 |       | -3245 | -3229 | +     | 5.26 TTTGGCAAATCAAAAG |
| MICAL1       | -3255 | -3239 | -     | 5.42  | CTAATGATTGGATATT      |
| ZBTB24       | -3239 | -3223 | -     | 5.64  | GAGTCCATTGGAGGAG      |
| ZBTB24       | -3200 | -3184 | -     | 9.11  | TTTTTCATTGGCTGAA      |
| CD164        | -3207 | -3191 | +     | 11.49 | ATTGGCCAATCAGAAG      |
| D.AH17       | -3253 | -3237 | +     | 5.34  | AGCAGCCGATGAGCCT      |
| MRM1         | -3253 | -3237 | -     | 6.49  | CCCATCATTTGGTCTCT     |
| LHX1         | -3200 | -3184 | -     | 4.85  | CGCTCGATTGGACCAG      |
| ACACA        | -3255 | -3239 | -     | 4.84  | TTTCCCATTTGGGTAC      |
| KLF11        | -3235 | -3219 | +     | 7.83  | TTCGGCCAATAGCATC      |
| WDR31        | -3233 | -3217 | -     | 8.94  | GTCTAATTGGCTGAC       |
| AMBP         | -3217 | -3201 | +     | 5.58  | CTGCCCCAATGGGGTG      |
| COL27A1      | -3236 | -3220 | -     | 6.29  | TCTGTTATTGGATGTT      |

|              |       |       |   |      |                  |
|--------------|-------|-------|---|------|------------------|
| LOC100051562 | -3252 | -3236 | - | 6.12 | TAAATCATTGGTCATT |
| PPM1B        | -3224 | -3208 | + | 5.70 | GATTACCAATGACCAA |
| C25H9orf43   | -3217 | -3201 | - | 5.55 | TCACTCATTTGTCAAC |
| ZBTB18       | -3198 | -3182 | - | 6.11 | AACATTATTGGCTCTT |
