# Supplementary material for: Identification and Functional Annotation of Genes Related to Horses’ Performance: From GWAS to Post-GWAS
Source: MDPI journal article supplement (doi:10.3390/ani10071173), 2020-07-10
Supplement: s1 [file s1]

```

;TFM      Explorer
;Date      :      Wed      Jan      8      19:12:04
;Scanned   location      :      -3280:0
;Scanned   sequences      :      None      (24      sequences)
;Scanned   matrices      :      (130      matrices)
;Parameters :      minsize=      30      maxsize=      1500
;
;      headers
;      1 rank      window      rank
;      2 matrix      matrix      name
;      3 tf      transcription      factor      name
;      4 info      information      of      content
;      5 gc      gc      content      of
;      6 location      location      of      the
;      7 pvalue      pvalue      of      the

```

```

1 MA0003.1 TFAP2A 78.120.920.509 0.800000024-743:-203
list      of      hits
EIF4G3      -695      -686 +      7.28      GCCCGAGGC
EIF4G3      -549      -540 +      6.31      GCGCGCGC
EIF4G3      -317      -308 -      6.02      GCTGGAGGC
HP1BP3      -490      -481 +      6.47      GCGCGAGG
HP1BP3      -409      -400 +      6.31      GCGCGCGC
HP1BP3      -365      -356 -      7.07      CCGCGGGC
HP1BP3      -311      -302 -      6.87      GCTCGGGC
HP1BP3      -263      -254 +      6.52      GCCTGGAGG
HP1BP3      -215      -206 +      5.80      GCGCAGAGG
SH2D5      -649      -640 +      6.33      GCGAGGGG
SH2D5      -481      -472 -      6.45      CCTCGCGC
SH2D5      -349      -340 -      5.89      GCGGGGGC
SH2D5      -312      -303 -      6.37      GCGCGGGC
SH2D5      -301      -292 +      7.04      GCGGGGGC
SH2D5      -286      -277 -      6.31      GCGCGGGC
KIF17      -743      -734 -      6.47      CCTGGGGC
KIF17      -709      -700 -      6.79      CCCTGAGG
KIF17      -447      -438 -      7.07      CCGCGGGC
KIF17      -423      -414 +      6.02      GCCTCCAGC
KIF17      -399      -390 -      6.99      CCGCGCGC
KIF17      -346      -337 +      6.26      GCGACGGG
KIF17      -284      -275 +      7.25      GCGCTGGG
KIF17      -256      -247 +      6.09      GCCTGCAGC
KIF17      -218      -209 +      6.79      GCCTCAGG

```

|            |      |        |      |           |
|------------|------|--------|------|-----------|
| WVOX       | -717 | -708 + | 6.25 | GCCACGGGC |
| WVOX       | -576 | -567 + | 6.56 | GCCTCCGGC |
| WVOX       | -423 | -414 + | 5.96 | GCCGGGCGG |
| WVOX       | -297 | -288 + | 5.89 | GCCGAGGGC |
| WVOX       | -264 | -255 + | 5.88 | GCCGCGCGC |
| BCO1       | -296 | -287 + | 6.51 | GCCGGGAGC |
| A.KRD50    | -528 | -519 - | 6.79 | CCCTGCGGC |
| A.KRD50    | -502 | -493 - | 6.70 | GCTCAGGGC |
| A.KRD50    | -391 | -382 + | 6.69 | GCCCCAAGG |
| A.KRD50    | -266 | -257 + | 6.25 | GCCACGGGC |
| A.KRD50    | -254 | -245 + | 6.64 | GCCGGCGGG |
| A.KRD50    | -228 | -219 + | 7.04 | GCCGGGGGC |
| A.KRD50    | -210 | -201 + | 7.04 | GCCGGGGGC |
| AVPR1A     | -669 | -660 + | 6.39 | GCCCGGCGG |
| AVPR1A     | -374 | -365 + | 6.82 | GCCGTGGGG |
| AVPR1A     | -211 | -202 - | 6.31 | GCGCGGGGC |
| LOC1006300 | -382 | -373 - | 6.32 | CCTTCAGGC |
| LOC1006300 | -357 | -348 + | 7.25 | GCCCTGGGG |
| LOC1006300 | -341 | -332 + | 5.99 | GCCCTTGGC |
| STT3A      | -388 | -379 + | 6.03 | GCCTCCAGG |
| EI24       | -309 | -300 - | 5.75 | CCCAGCGGC |
| EI24       | -212 | -203 + | 5.72 | GCCGTGCGG |
| MCMD2      | -418 | -409 + | 6.94 | GCCCGGAGC |
| MCMD2      | -366 | -357 + | 6.70 | GCCCTGAGC |
| LOC1000520 | -626 | -617 - | 6.86 | CCCTCCGGC |
| LOC1000520 | -567 | -558 + | 7.41 | GCCCCGGGC |
| LOC1000520 | -535 | -526 + | 7.41 | GCCCCGGGC |
| LOC1000520 | -362 | -353 - | 5.96 | GCGGCGGGC |
| LOC1000520 | -337 | -328 + | 5.96 | GCCCGCCGC |
| LOC1000520 | -255 | -246 - | 5.94 | GCGCCCGGC |
| LOC1000520 | -203 | -194 + | 5.96 | GCCCGCCGC |
| ATP13A1    | -724 | -715 - | 6.82 | CCCCACGGC |
| ATP13A1    | -445 | -436 - | 6.32 | CCTTCCGGC |
| ATP13A1    | -343 | -334 + | 6.32 | GCCCAGGGC |
| ATP13A1    | -210 | -201 + | 6.39 | GCCCGGCGG |
| GMIP       | -346 | -337 + | 6.25 | GCCACGGGC |
| GMIP       | -229 | -220 - | 6.57 | CCCGGCGGC |
| LPAR2      | -726 | -717 + | 6.32 | GCCCAGGGC |
| LPAR2      | -716 | -707 + | 6.05 | GCCACAGGC |
| LPAR2      | -683 | -674 + | 6.32 | GCCAGGGGC |
| LPAR2      | -612 | -603 + | 6.13 | GCCAGAGGG |
| LPAR2      | -601 | -592 - | 6.32 | CCGCGGGGC |
| LPAR2      | -570 | -561 - | 6.51 | GCTCCAGGC |

|        |      |        |      |           |
|--------|------|--------|------|-----------|
| LPAR2  | -478 | -469 + | 6.45 | GCCGCGAGG |
| LPAR2  | -413 | -404 - | 6.57 | CCCGGCGGC |
| LPAR2  | -381 | -372 + | 6.45 | GCCGCGAGG |
| LPAR2  | -276 | -267 + | 6.03 | GCCGCCAGG |
| IF.AR2 | -370 | -361 - | 6.82 | CCCCAAGGC |
| IL10RB | -624 | -615 + | 6.57 | GCCTCCGGG |
| IL10RB | -377 | -368 - | 5.89 | GCGGGGGGG |
| IL10RB | -353 | -344 + | 7.49 | GCCCGGGGG |
| IL10RB | -340 | -331 + | 6.79 | GCCGCAGGG |
| IL10RB | -236 | -227 + | 6.39 | GCCCGGCGG |
| IL10RB | -207 | -198 - | 6.51 | GCTCCCGGC |
| IF.AR1 | -672 | -663 + | 7.47 | GCCCGGGGG |
| IF.AR1 | -657 | -648 + | 6.99 | GCCCCCGGC |
| IF.AR1 | -554 | -545 + | 6.31 | GCCCCGCGC |
| IF.AR1 | -486 | -477 + | 7.00 | GCCCCCGGG |
| IF.AR1 | -444 | -435 - | 6.44 | GCTCGAGGC |
| IF.AR1 | -432 | -423 + | 7.04 | GCCGGGGGG |
| IF.AR1 | -390 | -381 + | 5.89 | GCCGCGCGG |
| IF.AR1 | -222 | -213 + | 6.78 | GCCGCAGGC |
| PTPRM  | -741 | -732 + | 7.07 | GCCCGCGGG |
| PTPRM  | -732 | -723 + | 6.78 | GCCGCAGGC |
| PTPRM  | -695 | -686 - | 6.45 | CCTCGCGGC |
| PTPRM  | -525 | -516 + | 6.98 | GCCGCGGGG |
| PTPRM  | -503 | -494 - | 6.99 | CCCCGAGGC |
| PTPRM  | -487 | -478 + | 6.64 | GCCGGCGGG |
| PTPRM  | -444 | -435 - | 6.37 | GCGCCGGGG |
| PTPRM  | -407 | -398 + | 6.64 | GCCTGCGGG |
| PTPRM  | -372 | -363 + | 6.31 | GCCCCGCGC |
| PTPRM  | -345 | -336 + | 5.90 | GCCAGCGGC |
| PTPRM  | -328 | -319 + | 7.49 | GCCCGGGGG |
| PTPRM  | -316 | -307 - | 6.87 | GCTCGGGGC |
| PTPRM  | -280 | -271 - | 5.88 | GCGCGCGGC |
| PTPRM  | -249 | -240 + | 6.63 | GCCGGCGGC |

2 MA0146.1 Zfx 130.765.950.942 0.749369326-456:-186

| list   | of   | hits   |       |             |
|--------|------|--------|-------|-------------|
| HP1BP3 | -453 | -439 - | 5.30  | CAGACCCCGCC |
| HP1BP3 | -389 | -375 - | 5.11  | GAGGCTCCGCG |
| HP1BP3 | -355 | -341 + | 5.57  | GGGGGCGCGG  |
| HP1BP3 | -338 | -324 + | 5.33  | GGGGGCGGGG  |
| HP1BP3 | -272 | -258 + | 10.81 | GGCGGCTGGG  |
| HP1BP3 | -210 | -196 - | 6.21  | GAGGCCGTGCC |
| SH2D5  | -200 | -186 - | 6.10  | CGGGCCGGGG  |

|            |      |        |       |             |
|------------|------|--------|-------|-------------|
| KIF17      | -432 | -418 + | 6.31  | CGCGCGCCGGC |
| KIF17      | -292 | -278 + | 7.29  | GCGGCCGGGC  |
| KIF17      | -265 | -251 + | 5.13  | TGCGGCGGCGC |
| KIF17      | -227 | -213 + | 8.95  | CCGGGCAGGGC |
| KIF17      | -186 | -172 - | 7.29  | CAGGCGGCGGC |
| A.KRD50    | -434 | -420 - | 5.33  | CAGCCCCGCC  |
| A.KRD50    | -322 | -308 - | 6.02  | CAGGCACGGGC |
| A.KRD50    | -239 | -225 - | 7.92  | AAGGCCGAGGC |
| A.KRD50    | -225 | -211 + | 5.33  | GGGGGCGGGG  |
| LOC1006300 | -343 | -329 + | 6.95  | CAGCCCTTGGC |
| EI24       | -456 | -442 - | 5.80  | CAGGACTCGGC |
| EI24       | -427 | -413 + | 5.29  | GGCGGCGCGGC |
| EI24       | -347 | -333 + | 5.41  | CTCGCCCCGGA |
| EI24       | -295 | -281 + | 5.66  | GCGGCCCGGGC |
| LOC1000520 | -433 | -419 + | 5.62  | GCGGGCCGGGC |
| LOC1000520 | -383 | -369 - | 7.57  | GAGGCCGGACA |
| LOC1000520 | -317 | -303 + | 5.15  | CCGCCCCGCC  |
| ATP13A1    | -441 | -427 + | 6.65  | CCGGCCACAGC |
| ATP13A1    | -346 | -332 + | 5.27  | GGCGCCCAGGC |
| ATP13A1    | -219 | -205 + | 5.25  | TGGGGCCCCGC |
| ATP13A1    | -195 | -181 - | 6.27  | CAAGCCCCGGC |
| GMIP       | -386 | -372 + | 6.39  | GTTTCCTGGGC |
| GMIP       | -360 | -346 + | 5.45  | CAGGCCGAGGC |
| GMIP       | -343 | -329 + | 9.10  | ACGGGCCGGGC |
| GMIP       | -326 | -312 + | 5.04  | CGCGGCGGGGC |
| GMIP       | -305 | -291 + | 10.73 | CGGGGCGGGG  |
| GMIP       | -240 | -226 + | 5.34  | CGGGGCCGGGC |
| LPAR2      | -358 | -344 - | 7.41  | GAGGCCCAAGC |
| LPAR2      | -210 | -196 - | 6.09  | GAGGCTGGGG  |
| IL10RB     | -334 | -320 + | 5.73  | GGGGGCGGGG  |
| IL10RB     | -279 | -265 - | 5.55  | GAGGGCCGGGC |
| IL10RB     | -245 | -231 + | 5.62  | GGGGCTTGGGC |
| IF.AR1     | -440 | -426 - | 5.32  | GAGGCAGCGGC |
| IF.AR1     | -391 | -377 + | 8.24  | AGCCGCGCGGC |
| IF.AR1     | -343 | -329 + | 6.62  | AGGGTCAAGGC |
| IF.AR1     | -218 | -204 - | 7.28  | CAGGCCCAACA |
| PTPRM      | -456 | -442 - | 6.48  | CGGGCCGCGGC |
| PTPRM      | -186 | -172 + | 6.23  | GCGGGCGCGGC |

3 MA0162.1 Egr1 144.555.832.005 0.739393945-400:-301

|        |      |        |       |             |
|--------|------|--------|-------|-------------|
| list   | of   | hits   |       |             |
| HP1BP3 | -370 | -359 - | 7.83  | CCGCTCCCGCG |
| HP1BP3 | -341 | -330 + | 10.43 | CGCGGGGGGCG |

|            |      |        |      |             |
|------------|------|--------|------|-------------|
| HP1BP3     | -324 | -313 + | 5.20 | CGCGGGGGCGG |
| SH2D5      | -390 | -379 + | 4.51 | CGCGGGCGCGG |
| SH2D5      | -368 | -357 + | 4.44 | CACGTGGGGGG |
| SH2D5      | -341 | -330 + | 5.20 | CGCGGGGGCGG |
| SH2D5      | -301 | -290 + | 6.62 | GCCGGGGGGCG |
| KIF17      | -393 | -382 + | 4.55 | GGCGGGAGCGG |
| KIF17      | -302 | -291 + | 5.22 | TGCGGCGGCGG |
| A.KRD50    | -333 | -322 - | 4.53 | CCGCACACGCC |
| AVPR1A     | -363 | -352 + | 5.40 | TGCGGGGGGGG |
| CHEK1      | -385 | -374 + | 7.00 | TGTGTGGGAGG |
| STT3A      | -390 | -379 - | 4.75 | CCGCCTCCAGG |
| LOC1000520 | -317 | -306 - | 4.68 | CCGCCCGCGCC |
| GMIP       | -333 | -322 - | 7.46 | CCTCCTCCGCG |
| LPAR2      | -346 | -335 + | 5.06 | TGCGGGCGCGT |
| IL10RB     | -400 | -389 + | 5.20 | CGCGGGGGCGG |
| IL10RB     | -352 | -341 + | 7.98 | CCCGGGGGCGG |
| IF.AR1     | -305 | -294 + | 4.82 | TACGAGGGCGG |

4 MA0035.2 **Gata1** 108.778.685.237 0.372818182-2117:-1866

| list        | of    | hits    |      |             |
|-------------|-------|---------|------|-------------|
| EIF4G3      | -2100 | -2089 + | 6.94 | AGAGATAATGC |
| EIF4G3      | -1975 | -1964 - | 7.36 | CTGTTATCACC |
| EIF4G3      | -1890 | -1879 + | 6.66 | ACAGAGAAGAG |
| HP1BP3      | -1926 | -1915 + | 7.44 | TGAGATAAACG |
| SH2D5       | -2105 | -2094 - | 7.59 | CGCTTATCAGG |
| WWOX        | -2088 | -2077 + | 7.78 | GAAGATAAGCT |
| BCO1        | -1937 | -1926 + | 6.50 | GCTGATAATGG |
| A.KRD50     | -2083 | -2072 + | 6.87 | GGAGATAAATG |
| AVPR1A      | -1883 | -1872 - | 8.81 | TTTTTATCTCT |
| CHEK1       | -2014 | -2003 - | 6.74 | TTGTTATCAAT |
| EI24        | -2067 | -2056 + | 6.64 | AAAGATAGGCA |
| LOC10063010 | -1992 | -1981 + | 9.42 | GGAGATAAGAC |
| LOC1000520  | -2117 | -2106 + | 8.79 | TGAGATAAGCA |
| LOC1000520  | -2103 | -2092 - | 7.57 | TTATTATCTCT |
| LOC1000520  | -1950 | -1939 - | 6.25 | TTCATATCTGT |
| LOC1000548  | -2099 | -2088 - | 7.84 | TTATTATCTGT |
| LOC1000548  | -2077 | -2066 - | 7.03 | ATTTTATCACT |
| IL10RB      | -2021 | -2010 - | 6.87 | ACCTTATCATA |
| IL10RB      | -1920 | -1909 - | 7.45 | CTTTTATCTAT |
| IF.AR1      | -1866 | -1855 + | 6.38 | AGAGATAAATT |

5 MA0079.2 **SP1** 111.288.627.426 0.820000010-232:-121

list of hits

|            |      |        |       |            |
|------------|------|--------|-------|------------|
| EIF4G3     | -223 | -213 + | 5.74  | CGCTTCCCCC |
| EIF4G3     | -213 | -203 - | 8.47  | GGGGAGGGGG |
| EIF4G3     | -194 | -184 + | 9.04  | CCCCGCCGCC |
| EIF4G3     | -149 | -139 + | 8.00  | CTCCGCCTCC |
| EIF4G3     | -122 | -112 + | 6.62  | GCCCCCCCCC |
| HP1BP3     | -230 | -220 - | 6.30  | GGCGGCGGGA |
| HP1BP3     | -185 | -175 - | 6.60  | GGAAGGGGGG |
| HP1BP3     | -141 | -131 - | 6.58  | GGGGAGTGGG |
| SH2D5      | -200 | -190 - | 5.71  | CGGGCCGGGG |
| SH2D5      | -189 | -179 - | 7.07  | TGGGGCTGGG |
| SH2D5      | -171 | -161 - | 8.78  | GGGAGCGGGG |
| SH2D5      | -140 | -130 - | 7.02  | GGAGGGAGGG |
| SH2D5      | -123 | -113 - | 6.82  | TGGGGAGGAG |
| KIF17      | -154 | -144 + | 6.90  | CCCCGCCGCT |
| KIF17      | -143 | -133 + | 6.66  | CCCCCTCCTC |
| WVOX       | -190 | -180 - | 6.82  | CGGGGAGGAG |
| WVOX       | -132 | -122 - | 7.72  | TGAGGAGGGG |
| A.KRD50    | -225 | -215 - | 11.09 | GGGGGCGGGG |
| A.KRD50    | -213 | -203 - | 7.84  | GGGGCCGGGG |
| A.KRD50    | -189 | -179 - | 8.96  | TGGGGCGGGG |
| A.KRD50    | -179 | -169 - | 6.96  | CGGGGCGGAG |
| AVPR1A     | -231 | -221 - | 7.02  | GGAGGGTGGG |
| AVPR1A     | -123 | -113 - | 7.07  | AGGGGCTGGG |
| ACRV1      | -218 | -208 + | 8.04  | CCCCTCCTTC |
| EI24       | -231 | -221 - | 8.89  | GGCGGAGGGG |
| EI24       | -166 | -156 - | 7.04  | GGCGGCGGAG |
| LOC1000520 | -140 | -130 - | 7.71  | GGGGGCGGGC |
| GMIP       | -208 | -198 + | 7.07  | CCCAGCCCCG |
| LPAR2      | -232 | -222 + | 5.86  | CCCTGTCCTC |
| LPAR2      | -211 | -201 - | 8.11  | GGAGGCTGGG |
| LPAR2      | -188 | -178 - | 6.22  | AGGGGCGGGA |
| LPAR2      | -165 | -155 - | 11.09 | GGGGGCGGGG |
| LPAR2      | -140 | -130 - | 7.14  | TAGGGCGGGG |
| IL10RB     | -131 | -121 - | 8.81  | CGGGGAGGGG |
| IF.AR1     | -180 | -170 - | 6.76  | CGCGGAGGGG |
| IF.AR1     | -159 | -149 - | 5.98  | AGGGGGAGGG |
| IF.AR1     | -138 | -128 - | 8.96  | AGGGGCGGGG |
| IF.AR1     | -121 | -111 - | 6.58  | GGAGACAGGG |
| PTPRM      | -175 | -165 + | 6.79  | CTCCGCTCCC |
| PTPRM      | -133 | -123 - | 7.15  | GGCGGCAGGG |

6 MA0112.2 ESR1 135.630.609.902 0.594271941-195:-56

list of hits

|            |      |        |       |             |
|------------|------|--------|-------|-------------|
| EIF4G3     | -102 | -82 -  | 5.61  | TTGTACGGAG  |
| HP1BP3     | -133 | -113 + | 4.98  | GGCGCGGGTC  |
| SH2D5      | -165 | -145 - | 7.12  | GGGGCTCGGT  |
| WVOX       | -110 | -90 +  | 5.76  | TGGGCGGGGC  |
| BCO1       | -174 | -154 - | 8.01  | GGGCCAGAGT  |
| A.KRD50    | -69  | -49 -  | 6.29  | GGGGCAGCTG  |
| AVPR1A     | -195 | -175 + | 4.82  | TCCCGGAGCCA |
| ACRV1      | -56  | -36 +  | 5.39  | TACCCGAATCA |
| LOC1006300 | -189 | -169 + | 10.87 | GCCACTGGTCA |
| LOC1006300 | -126 | -106 - | 5.51  | AGGGCAGTGG  |
| STT3A      | -189 | -169 - | 5.22  | ATGGCAGAGG  |
| EI24       | -58  | -38 -  | 6.02  | AGGGCAGGCA  |
| LOC1006301 | -167 | -147 + | 7.83  | GCCACTGATCA |
| GMIP       | -129 | -109 - | 4.93  | ATGCGAGAGT  |
| LPAR2      | -164 | -144 + | 6.66  | GGGGCGGGGC  |
| LPAR2      | -56  | -36 +  | 4.89  | AGCCGCGGTG  |
| IF.AR2     | -121 | -101 + | 5.39  | GAAGGGAGTC  |
| IL10RB     | -192 | -172 - | 5.97  | ATGGCACGGAC |
| IL10RB     | -64  | -44 +  | 6.24  | CGGCCCAGGG  |

7 MA0081.1 SPIB 906.007.130.057 0.466472323-3192:-3018

| list       | of    | hits    |      |         |
|------------|-------|---------|------|---------|
| EIF4G3     | -3190 | -3183 - | 7.09 | TTCCTGT |
| SH2D5      | -3158 | -3151 + | 6.55 | TCAGGAA |
| SH2D5      | -3138 | -3131 + | 6.55 | TCAGGAA |
| SH2D5      | -3091 | -3084 - | 6.60 | TTCCCCT |
| SH2D5      | -3058 | -3051 - | 6.55 | TTCCTGA |
| WVOX       | -3038 | -3031 + | 7.09 | ACAGGAA |
| BCO1       | -3128 | -3121 + | 7.28 | TGAGGAA |
| AVPR1A     | -3060 | -3053 + | 7.28 | TGAGGAA |
| LOC1006300 | -3018 | -3011 - | 6.55 | TTCCTGA |
| LOC1006301 | -3174 | -3167 - | 7.09 | TTCCTGT |
| LOC1000520 | -3190 | -3183 - | 7.09 | TTCCTGT |
| LOC1000520 | -3126 | -3119 - | 7.28 | TTCCTCA |
| LOC1000548 | -3094 | -3087 + | 7.28 | TGAGGAA |
| GMIP       | -3178 | -3171 + | 6.60 | AGGGGAA |
| IF.AR2     | -3027 | -3020 - | 7.28 | TTCCTCA |
| IF.AR1     | -3095 | -3088 + | 6.60 | AGGGGAA |
| PTPRM      | -3192 | -3185 - | 7.82 | TTCCTCT |
| PTPRM      | -3159 | -3152 - | 7.82 | TTCCTCT |

8 MA0259.1 HIF1A::ARNT 973.982.402.355 0.657451923-1807:-1701

list of hits

|        |       |         |      |          |
|--------|-------|---------|------|----------|
| HP1BP3 | -1736 | -1728 + | 7.08 | GCACGTGG |
| HP1BP3 | -1718 | -1710 + | 6.79 | GCGCGTGC |
| SH2D5  | -1760 | -1752 + | 7.08 | GCACGTGG |
| LPAR2  | -1725 | -1717 + | 6.95 | GGGCGTGC |
| IF.AR2 | -1807 | -1799 + | 7.23 | GGACGTGG |
| IL10RB | -1701 | -1693 - | 6.96 | GCACGTTC |

|            |       |         |                 |             |             |
|------------|-------|---------|-----------------|-------------|-------------|
| 9 MA0084.1 |       | SRY     | 919.301.452.288 | 0.238095234 | -2451:-2316 |
| list       | of    | hits    |                 |             |             |
| EIF4G3     | -2376 | -2367 + | 7.84            |             | TATAACAAT   |
| HP1BP3     | -2402 | -2393 - | 6.55            |             | ATTGTGAAA   |
| SH2D5      | -2375 | -2366 + | 6.57            |             | TGAAACAAA   |
| KIF17      | -2407 | -2398 + | 6.69            |             | GAAGACAAT   |
| WWOX       | -2441 | -2432 - | 6.49            |             | ATTGTGTAG   |
| WWOX       | -2349 | -2340 + | 6.98            |             | GAATACAAT   |
| A.KRD50    | -2448 | -2439 - | 6.22            |             | ATTGATAAA   |
| A.KRD50    | -2318 | -2309 + | 7.55            |             | GTTAACAAA   |
| AVPR1A     | -2333 | -2324 + | 6.29            |             | GATCACAAT   |
| CHEK1      | -2322 | -2313 + | 6.47            |             | TAACACAAT   |
| MCMDC2     | -2316 | -2307 + | 6.49            |             | CTACACAAT   |
| LOC1000520 | -2451 | -2442 - | 6.49            |             | ATTGTCTAG   |
| LOC1000520 | -2409 | -2400 - | 7.25            |             | TTTGTTTTA   |
| LOC1000548 | -2424 | -2415 - | 6.57            |             | ATTGTAATC   |
| LOC1000548 | -2332 | -2323 + | 8.32            |             | TTTAACAAT   |
| ATP13A1    | -2404 | -2395 - | 6.83            |             | ATTGTAAAA   |
| LPAR2      | -2376 | -2367 + | 6.87            |             | CTTAACAAA   |
| IF.AR2     | -2449 | -2440 + | 6.79            |             | CAAAACAAA   |

|             |       |             |                 |             |              |
|-------------|-------|-------------|-----------------|-------------|--------------|
| 10 MA0140.1 |       | Tal1::Gata1 | 112.966.184.617 | 0.450677699 | -3197:-2457  |
| list        | of    | hits        |                 |             |              |
| EIF4G3      | -2714 | -2696 +     | 5.68            |             | TTGCTTGCAGT/ |
| SH2D5       | -2529 | -2511 -     | 5.74            |             | GTAATCTCCAGI |
| WWOX        | -2457 | -2439 -     | 6.34            |             | TTTATCAAATAI |
| BCO1        | -2862 | -2844 -     | 7.48            |             | CTTATCTCACCA |
| A.KRD50     | -2457 | -2439 +     | 6.75            |             | ATTTGGGTGAT  |
| AVPR1A      | -3017 | -2999 +     | 7.37            |             | TTGTGAAACAT  |
| AVPR1A      | -2881 | -2863 -     | 5.60            |             | TCTATCAATACC |
| CHEK1       | -3074 | -3056 -     | 7.99            |             | CTTATCTCTTAC |
| ACRV1       | -3026 | -3008 -     | 7.28            |             | GTTATCTTCAGC |
| ACRV1       | -2721 | -2703 -     | 6.69            |             | CTCATCTTTTGT |
| LOC1006300  | -3197 | -3179 +     | 7.34            |             | CTCAGAGAAAG  |
| STT3A       | -3108 | -3090 +     | 6.08            |             | GAGTAAGGGAC  |
| STT3A       | -3000 | -2982 +     | 9.18            |             | TTGGATCATTT/ |



|             |       |         |      |              |
|-------------|-------|---------|------|--------------|
| STT3A       | -2516 | -2498 + | 7.60 | TTGGAGATTTC  |
| EI24        | -3114 | -3096 - | 6.61 | TTTATCAGTTAT |
| EI24        | -2867 | -2849 - | 7.16 | GTTATCTCTTTA |
| EI24        | -2787 | -2769 + | 6.69 | CCACAACCTTTC |
| EI24        | -2615 | -2597 + | 6.13 | AGAGCTTCTAG  |
| LOC10063010 | -3158 | -3140 - | 5.92 | TTTATCTAAATT |
| MCMD2       | -2511 | -2493 - | 6.64 | CTTATCGCTTGC |
| LOC1000520  | -2762 | -2744 - | 7.15 | TTTATCTGCTAT |
| LOC1000520  | -2564 | -2546 - | 6.77 | CCTATCATTATA |
| LOC1000520  | -2469 | -2451 - | 6.92 | CTTATCTCATTG |
| LOC1000548  | -3196 | -3178 - | 6.21 | TTTATCACTAA  |
| LOC1000548  | -2670 | -2652 - | 5.77 | CATATCATATTT |
| ATP13A1     | -3039 | -3021 + | 7.33 | ACTGAGGGGGTC |
| ATP13A1     | -2580 | -2562 + | 9.27 | ATGGTACATTC  |
| LPAR2       | -2641 | -2623 - | 8.03 | CATATCTCCTAT |
| IF.AR2      | -3020 | -3002 - | 7.18 | GTTATCACTATC |
| IF.AR1      | -3197 | -3179 - | 6.34 | CTTATCAAAAAG |
| IF.AR1      | -3028 | -3010 + | 6.39 | TTTGGCAAAAC  |
| IF.AR1      | -2881 | -2863 + | 9.01 | GGGGGACGGG   |
| IF.AR1      | -2539 | -2521 + | 7.28 | GAGGAAATATT  |
| PTPRM       | -2569 | -2551 + | 5.68 | GTTTGCTAGCT  |

|            |    |          |        |                 |             |          |
|------------|----|----------|--------|-----------------|-------------|----------|
|            | 11 | MA0117.1 | Mafb   | 676.893.922.026 | 0.608333337 | -185:-53 |
| list       |    | of       | hits   |                 |             |          |
| EIF4G3     |    | -90      | -82 -  | 5.80            |             | CCGGCAGC |
| EIF4G3     |    | -53      | -45 +  | 5.80            |             | GCTGCCGG |
| HP1BP3     |    | -79      | -71 +  | 6.28            |             | GCCGACGC |
| KIF17      |    | -61      | -53 +  | 5.80            |             | GCTGCCGC |
| A.KRD50    |    | -125     | -117 - | 5.80            |             | GCGGCAGC |
| AVPR1A     |    | -154     | -146 - | 6.28            |             | GCGTCGGC |
| ACRV1      |    | -93      | -85 -  | 5.76            |             | GTTTCAGC |
| LOC1006300 |    | -56      | -48 -  | 5.76            |             | CTATCAGC |
| EI24       |    | -185     | -177 + | 5.80            |             | GCTGCCGC |
| EI24       |    | -157     | -149 + | 5.80            |             | GCTGCCGG |
| LOC1000548 |    | -184     | -176 + | 7.02            |             | GCTGACTG |
| ATP13A1    |    | -150     | -142 + | 5.76            |             | GCTGATAG |
| IF.AR2     |    | -116     | -108 - | 7.02            |             | GAGTCAGC |
| IF.AR2     |    | -98      | -90 +  | 6.60            |             | GCTGATGG |
| PTPRM      |    | -146     | -138 + | 5.73            |             | GCCGACTG |

|        |       |          |       |                 |             |             |
|--------|-------|----------|-------|-----------------|-------------|-------------|
|        | 12    | MA0158.1 | HOXA5 | 875.888.972.496 | 0.319270834 | -2988:-2946 |
| list   | of    | hits     |       |                 |             |             |
| EIF4G3 | -2958 | -2950 +  | 7.27  | CTCTAATT        |             |             |

|         |       |         |      |          |
|---------|-------|---------|------|----------|
| WVOX    | -2974 | -2966 - | 6.94 | AATTACAG |
| BCO1    | -2974 | -2966 - | 7.09 | AATTTCTG |
| ATP13A1 | -2962 | -2954 + | 6.94 | CTGTAATT |
| LPAR2   | -2951 | -2943 + | 6.87 | CATAAATT |
| IF.AR1  | -2988 | -2980 + | 6.54 | CGTAAATT |
| IF.AR1  | -2946 | -2938 + | 7.27 | CATTAATT |

|        |    |          |         |                |             |             |
|--------|----|----------|---------|----------------|-------------|-------------|
|        | 13 | MA0147.1 | Myc     | 11.157.239.362 | 0.685903085 | -1790:-1691 |
| list   |    | of       | hits    |                |             |             |
| HP1BP3 |    | -1737    | -1727 + | 9.75           |             | AGCACGTGGT  |
| HP1BP3 |    | -1719    | -1709 - | 5.30           |             | TGCGCGTGCC  |
| SH2D5  |    | -1768    | -1758 + | 6.11           |             | AGCACTTGGC  |
| KIF17  |    | -1790    | -1780 + | 6.26           |             | CCCATGTGGA  |
| KIF17  |    | -1723    | -1713 + | 7.23           |             | ATCACGTGGT  |
| KIF17  |    | -1691    | -1681 - | 5.69           |             | CCCATGTGTG  |
| BCO1   |    | -1766    | -1756 + | 9.16           |             | AACACGTGGC  |
| BCO1   |    | -1723    | -1713 + | 5.63           |             | TGCACGCGTT  |
| GMIP   |    | -1703    | -1693 + | 5.25           |             | AGCACTTGGA  |

|            |    |          |        |                 |             |            |
|------------|----|----------|--------|-----------------|-------------|------------|
|            | 14 | MA0028.1 | ELK1   | 881.228.537.154 | 0.567857146 | -771:-296  |
| list       |    | of       | hits   |                 |             |            |
| EIF4G3     |    | -410     | -400 + | 6.80            |             | TCTCCGGAAG |
| WVOX       |    | -750     | -740 + | 6.13            |             | TGAACGGAAG |
| WVOX       |    | -326     | -316 - | 7.19            |             | CGTCCGGCTG |
| BCO1       |    | -321     | -311 + | 6.41            |             | GAACAGGAAG |
| A.KRD50    |    | -662     | -652 + | 6.21            |             | CACCCGGACA |
| AVPR1A     |    | -753     | -743 - | 5.92            |             | TGTCCGGAGG |
| AVPR1A     |    | -647     | -637 + | 6.06            |             | GCCCCGGACA |
| LOC1006300 |    | -381     | -371 - | 6.69            |             | CTTCAGGCAC |
| STT3A      |    | -568     | -558 - | 5.91            |             | TTTCCGCTTC |
| MCMD2      |    | -706     | -696 - | 5.88            |             | CTTCCGTGCT |
| LOC1000520 |    | -382     | -372 + | 6.61            |             | AGGCCGGACA |
| ATP13A1    |    | -611     | -601 + | 6.29            |             | CAGCCGGATG |
| ATP13A1    |    | -578     | -568 - | 8.86            |             | CTTCCGGTTC |
| ATP13A1    |    | -529     | -519 - | 7.93            |             | TTTCCGGTCT |
| ATP13A1    |    | -444     | -434 - | 7.56            |             | CTTCCGGCCA |
| ATP13A1    |    | -403     | -393 - | 7.42            |             | CTTCCGGACT |
| ATP13A1    |    | -334     | -324 + | 7.45            |             | TCACCGGAAG |
| ATP13A1    |    | -296     | -286 + | 6.65            |             | TGCCCGGAAG |
| GMIP       |    | -771     | -761 + | 6.58            |             | GGACCTGAAG |
| LPAR2      |    | -305     | -295 + | 8.46            |             | GCGCCGGAAG |
| IF.AR2     |    | -747     | -737 - | 5.83            |             | TTTCCTGTAC |
| IF.AR2     |    | -452     | -442 + | 5.94            |             | GGGCAGGAAA |

|        |      |        |      |            |
|--------|------|--------|------|------------|
| IL10RB | -756 | -746 + | 6.61 | GTGCCTGAAA |
| IL10RB | -372 | -362 + | 6.96 | GGGCCGGACA |
| IF.AR1 | -417 | -407 + | 6.06 | CAACAGGAAG |

|         |    |          |         |                 |                        |
|---------|----|----------|---------|-----------------|------------------------|
|         | 15 | MA0136.1 | ELF5    | 869.309.550.562 | 0.429292928-2105:-2056 |
| list    |    | of       | hits    |                 |                        |
| KIF17   |    | -2105    | -2096 - | 7.29            | CAGGAAGTG              |
| KIF17   |    | -2056    | -2047 - | 6.36            | GAGGAAGCA              |
| BCO1    |    | -2101    | -2092 - | 6.59            | AAGGATGCA              |
| BCO1    |    | -2060    | -2051 - | 6.98            | ACGGATATA              |
| A.KRD50 |    | -2061    | -2052 - | 6.49            | AAGGAAGGA              |
| ACRV1   |    | -2099    | -2090 - | 7.35            | AAGGAACTA              |
| STT3A   |    | -2102    | -2093 - | 7.29            | CAGGAAGTG              |
| GMIP    |    | -2086    | -2077 + | 6.34            | TTCTTCCTG              |
| IF.AR1  |    | -2081    | -2072 - | 7.41            | CAGGAAATT              |

|            |    |          |         |               |                        |
|------------|----|----------|---------|---------------|------------------------|
|            | 16 | MA0025.1 | NFIL3   | 1.413.850.704 | 0.264822136-1792:-1480 |
| list       |    | of       | hits    |               |                        |
| EIF4G3     |    | -1782    | -1771 - | 4.60          | GTATTACAAAT            |
| WWOX       |    | -1767    | -1756 - | 4.49          | GAGTTACATAC            |
| A.KRD50    |    | -1646    | -1635 + | 5.18          | TTCTGTAACCT            |
| A.KRD50    |    | -1563    | -1552 - | 4.42          | TTCTTACTTAA            |
| A.KRD50    |    | -1539    | -1528 + | 7.77          | ATATGTAATTT            |
| AVPR1A     |    | -1770    | -1759 + | 5.50          | TGATATAACCG            |
| LOC1006300 |    | -1722    | -1711 + | 4.76          | ATATATAAGTT            |
| LOC1006300 |    | -1582    | -1571 - | 7.77          | AAACTACATAA            |
| EI24       |    | -1781    | -1770 + | 4.60          | ATTTGTAAGAT            |
| EI24       |    | -1541    | -1530 + | 4.72          | CTATGTAATAA            |
| LOC1006301 |    | -1505    | -1494 - | 5.07          | GAGTTACATCT            |
| LOC1000548 |    | -1653    | -1642 + | 4.68          | TTATGGAATAA            |
| LOC1000548 |    | -1523    | -1512 + | 7.64          | ATATGTAAGGT            |
| GMIP       |    | -1487    | -1476 - | 4.60          | TCATTACAAAT            |
| IF.AR2     |    | -1480    | -1469 - | 7.86          | AAATTATGTAA            |
| IL10RB     |    | -1640    | -1629 - | 7.83          | CGGTTACATCA            |
| IF.AR1     |    | -1792    | -1781 + | 5.63          | TTATATAGCAA            |
| IF.AR1     |    | -1691    | -1680 + | 4.45          | ATACATAACTC            |
| PTPRM      |    | -1708    | -1697 + | 9.35          | TGATGTAACGT            |

|       |    |          |         |                 |                        |
|-------|----|----------|---------|-----------------|------------------------|
|       | 17 | MA0154.1 | EBF1    | 115.644.748.683 | 0.648000004-1610:-1501 |
| list  |    | of       | hits    |                 |                        |
| SH2D5 |    | -1596    | -1586 - | 6.01            | TCCCTGTGAG             |
| SH2D5 |    | -1552    | -1542 + | 5.58            | ATTAAAGGGA             |
| WWOX  |    | -1502    | -1492 + | 7.78            | CCTCCTGGGA             |

|             |       |         |      |            |
|-------------|-------|---------|------|------------|
| AVPR1A      | -1610 | -1600 - | 5.45 | CCCCTTTGGA |
| STT3A       | -1564 | -1554 - | 5.39 | TCCCTTTAAG |
| LOC10063010 | -1572 | -1562 + | 7.44 | TCCCTGGGGA |
| MCMD2       | -1578 | -1568 - | 6.30 | TCCCAGGAGC |
| MCMD2       | -1519 | -1509 - | 7.09 | TCTCCTGGGT |
| MCMD2       | -1501 | -1491 - | 6.60 | TCCCTTAGAG |
| LOC10005480 | -1538 | -1528 - | 8.24 | TCTCTTGGGT |
| LPAR2       | -1595 | -1585 - | 8.48 | TCCCCTGAGG |
| LPAR2       | -1541 | -1531 + | 7.09 | ACCCAGGAGA |
| IFAR2       | -1573 | -1563 + | 5.89 | TCTTTAGGGA |
| PTPRM       | -1561 | -1551 + | 7.62 | GCCCCGGGGA |

|             |       |         |                 |                        |
|-------------|-------|---------|-----------------|------------------------|
| 18 MA0080.2 |       | SPI1    | 964.024.729.829 | 0.435374151-2194:-2080 |
| list        | of    | hits    |                 |                        |
| KIF17       | -2168 | -2161 + | 6.31            | AGGAAGA                |
| KIF17       | -2104 | -2097 + | 8.65            | AGGAAGT                |
| AVPR1A      | -2155 | -2148 + | 6.31            | AGGAAGA                |
| AVPR1A      | -2121 | -2114 - | 6.31            | TCTTCCT                |
| ACRV1       | -2194 | -2187 - | 6.31            | TCTTCCT                |
| ACRV1       | -2098 | -2091 + | 6.28            | AGGAACT                |
| STT3A       | -2101 | -2094 + | 8.65            | AGGAAGT                |
| EI24        | -2193 | -2186 - | 6.81            | GCTTCCT                |
| LOC10063010 | -2183 | -2176 - | 6.78            | ATTCCT                 |
| ATP13A1     | -2120 | -2113 + | 6.78            | AGGAAAT                |
| GMIP        | -2085 | -2078 - | 6.31            | TCTTCCT                |
| LPAR2       | -2133 | -2126 - | 6.31            | TCTTCCT                |
| IFAR2       | -2166 | -2159 + | 6.78            | AGGAAAT                |
| IFAR1       | -2080 | -2073 + | 6.78            | AGGAAAT                |
| PTPRM       | -2163 | -2156 - | 8.65            | ACTTCCT                |
| PTPRM       | -2150 | -2143 - | 6.96            | ACTTCCC                |

|             |       |         |                 |                        |
|-------------|-------|---------|-----------------|------------------------|
| 19 MA0080.2 |       | SPI1    | 964.024.729.829 | 0.435374151-1718:-1622 |
| list        | of    | hits    |                 |                        |
| EIF4G3      | -1706 | -1699 - | 6.81            | GCTTCCT                |
| HP1BP3      | -1701 | -1694 + | 6.31            | AGGAAGA                |
| SH2D5       | -1660 | -1653 - | 8.65            | ACTTCCT                |
| KIF17       | -1649 | -1642 - | 6.81            | GCTTCCT                |
| AVPR1A      | -1692 | -1685 - | 6.78            | ATTCCT                 |
| LOC10063000 | -1703 | -1696 + | 6.31            | AGGAAGA                |
| MCMD2       | -1718 | -1711 - | 6.81            | GCTTCCT                |
| LOC10005200 | -1657 | -1650 + | 6.78            | AGGAAAT                |
| GMIP        | -1660 | -1653 - | 6.78            | ATTCCT                 |
| LPAR2       | -1635 | -1628 + | 6.81            | AGGAAGC                |

|        |       |         |      |         |
|--------|-------|---------|------|---------|
| IF.AR1 | -1656 | -1649 + | 6.31 | AGGAAGA |
| IF.AR1 | -1622 | -1615 - | 6.31 | TCTTCCT |
| PTPRM  | -1691 | -1684 + | 6.45 | AAGAAGT |
| PTPRM  | -1637 | -1630 + | 6.42 | AGAAAGT |

|            |    |          |        |                 |             |           |
|------------|----|----------|--------|-----------------|-------------|-----------|
|            | 20 | MA0161.1 | NFIC   | 698.267.924.778 | 0.568504061 | -617:-574 |
| list       |    | of       | hits   |                 |             |           |
| SH2D5      |    | -608     | -602 + | 5.83            |             | CTGGCA    |
| WVOX       |    | -606     | -600 + | 5.83            |             | CTGGCA    |
| CHEK1      |    | -584     | -578 - | 6.73            |             | TGCCAA    |
| ACRV1      |    | -617     | -611 - | 5.91            |             | AGCCAA    |
| ACRV1      |    | -593     | -587 - | 5.91            |             | AGCCAA    |
| ACRV1      |    | -574     | -568 - | 5.91            |             | AGCCAA    |
| LOC1006300 |    | -592     | -586 - | 5.91            |             | AGCCAA    |
| IL10RB     |    | -615     | -609 + | 6.73            |             | TTGGCA    |

|            |    |          |            |                 |             |              |
|------------|----|----------|------------|-----------------|-------------|--------------|
|            | 21 | MA0149.1 | EWSR1-FLI1 | 328.714.828.257 | 0.554497355 | -982:-893    |
| list       |    | of       | hits       |                 |             |              |
| EIF4G3     |    | -898     | -880 -     | -8.21           |             | CTTTCCTTCCCC |
| HP1BP3     |    | -912     | -894 -     | -8.41           |             | AATTCCCTCTTT |
| SH2D5      |    | -982     | -964 +     | -8.41           |             | GGCCCGGAGG   |
| SH2D5      |    | -923     | -905 +     | 1.99            |             | AGGATGACGG   |
| BCO1       |    | -921     | -903 +     | -7.36           |             | GGAAGATGGG   |
| AVPR1A     |    | -916     | -898 -     | -8.39           |             | AAGTGCTTCTT  |
| CHEK1      |    | -915     | -897 -     | -6.94           |             | CTCACATTACTT |
| ACRV1      |    | -968     | -950 +     | -2.58           |             | GAACAAAAAG   |
| ACRV1      |    | -899     | -881 +     | -6.29           |             | CTAAGGAAGCA  |
| LOC1006300 |    | -893     | -875 +     | -8.09           |             | GGAAAGGAAG   |
| STT3A      |    | -981     | -963 +     | -3.04           |             | GGAGAGAGGG   |
| EI24       |    | -969     | -951 +     | -3.37           |             | GCTAGGAAGG   |
| EI24       |    | -947     | -929 +     | -8.25           |             | GGGGGGGGGG   |
| EI24       |    | -921     | -903 +     | -3.05           |             | GAAAAAAAAG   |
| MCMD2      |    | -917     | -899 +     | -6.23           |             | GGGGGAAGGG   |
| LOC1000548 |    | -959     | -941 +     | -7.78           |             | CAAAAGAAGGT  |
| LPAR2      |    | -970     | -952 +     | -7.23           |             | GGAAGGGTGA   |

2020

ratio=3.0, top=25

of the window window  
the matrix (relatively to TSS)  
matrix (G+C)%

2,84E-03



7,48E+04

ACCCCGCCCGG  
GCTCCGCGCGC  
GGCGCGGCCGG  
GGCGGGGCCGG  
GGCTGGGCCTG  
GCCGTGCGGGA  
GCCGGGGCTGG



GCGCCGGCCTC  
GCCGGGCCCTG  
GGCGGCGCCTG  
GGCAGGGCCTC  
GCGGCGGCCCC  
CCCCCGCCCC  
GCACGGGCGGC  
GCCGAGCGGCC  
GGCGGGGCCGG  
CCCTTGGCCTG  
GACTCGGCGTC  
GGCGCGGCCGG  
GCCCCGGA CTG  
GCCCCGGGCATG  
GGCCGGCCCTC  
GCCGGACAGCC  
CCCGCGCCCTC  
GCCACAGCCTG  
GCCCAGGGCTC  
GGCCCCGGCCCG  
GCCCCGGGCCGC  
TCCTGGGCCTT  
GCCGAGGCGTG  
GGCCGGGCCTC  
GGCGGGGCGTG  
GGCGGGGCCTC  
GGCCGGGCCCC  
GCCCAAGACTG  
GCTGGGGTCCC  
GGCGGGGCCCC  
GGCCGGGCTGG  
GCTTGGGCCCC  
GCAGCGCCGGG  
CGCGCGGCCTG  
GTCAAGGCCTC  
GCCCAACTC  
GCCGCGGCTGC  
GGCGCGCCCTC

2,15E+05

CTCCCGCG  
GGGGGCGG

GGGGGCGC  
GGGCGCGG  
GTGGGGGG  
GGGGGCGC  
GGGGGCGG  
GGGAGCGA  
GGCGGCGG  
CACACGCC  
GGGGGGGG  
GTGGGAGA  
CCTCCAGG  
CCCGCGCC

GGGCGCGT  
GGGGGCGC  
GGGGGCGG  
GAGGGCGG

9,14E+05

GATAATGC

GAGAAGAA  
GATAAACG  
TTATCAGG  
GATAAGCT  
GATAATGG  
GATAAATG

GATAGGCA  
GATAAGAG  
GATAAGCA

GATAAATT

9,64E+05

GAGGGGG

AGGGGGG

GAGTGGG

AGCGGGG

GGGAGGG

GGAGGAG

GGCGGGG

GCCGGGG

GGGTGGG

GGAGGGG

GGCGGGC

GGCGGGA

GGCGGGG

GGAGGGG

GGGAGGG

GGCGGGG

1,10E+04

ACCGGCAGC  
ACTGGACCC  
CCCAGGCGC  
GCGGGGCCGCTGCCCC  
CCAGAGTGACAGGTGAG  
GCAGCTGGAGCTGGCAG  
CGGAGCCAAGCTGCCCC  
CCGAATCAATCTGACTC  
ACTGGTCATCCTGTCCT  
GCAGTGGGACTGAGGAG  
GCAGAGGGAGCCGAGCG  
GCAGGCAGGGCCGGAGC  
ACTGATCATCCTGTCCT  
CGAGAGTGGCCTCCCCC  
GCGGGGCGCTGTGGCCC  
CCGAGCCAT  
AGCCTGGCTT  
CCTCTGGAG  
ACCCCGACCC

2,96E+06

3,10E+05

3,15E+06

4,19E+05

CTTGCAGTAGATTAA  
ATCTCCAGCCCCAGG  
ATCAAATATTTACAT  
ATCTCACCATGTAAT  
TGGGTGATTGATAAA  
TGAAACATTGATAAA  
ATCAATACCTTCAAC  
ATCTCTTACGTAAGA  
ATCTTCAGGTCTCCG  
ATCTTTTTGAACCAG  
AGAGAAAGTGATAAG  
TAAGGGAGAGATTAG  
GATCATTTAGATAAG

GAGATTTTCAGATAGA  
ATCAGTTATAACACT  
ATCTCTTTACAAGAC  
CAACTTTTCAGATAAG  
GCTTCTAGAGATAAG  
ATCTAAATTCTACTA  
ATCGCTTGCTTCCAT  
ATCTGCTATAAAACA  
ATCATTATATGACAA  
ATCTCATTGGAATAT  
ATCACTAAATTGCTA  
ATCATATTTGCCCAT  
GAGGGGTGAGATAAA  
GTACATTCAGATAAC  
ATCTCCTATGCACAG  
ATCACTATCCCCAGA  
ATCAAAAGGAACAGA  
GGCAAAACTGATAGA  
GGACGGGGAGATAAA  
GAAATATTAGATAAG  
TGCTAGCTTGATAAA

4,63E+06

4,88E+06

5,40E+05

5,42E+06

5,55E+06

5,72E+06

TTACATAC

TATAACCG

CTACATAA

TGGAATAA

TGTAAGGT

TGTAACGT

6,07E+06



7,17E+06

7,37E+06

7,90E+06

9,58E+05

TCCCTCCCCCAGCCT  
TCCCTCTTTTCTTTT  
CCGGAGGGAGGAGGA  
ATGACGGAAGGAAGG  
AGATGGGCACGGATG  
TGCTTCTTTCCTTTT  
ACATTACTTACCTCC  
CAAAAAGAAGGAAAG  
AGGAAGCAGGGGAAG  
AAGGAAGTAGTAAAA  
GAGAGGGCAAAAAGG  
AGGAAGGAAAATAGG  
GGGGGGGGGGCAAAG  
AAAAAAGAAGAAATG  
GGAAGGGAAGGTTAC  
AAGAAGGTACTAAGG  
AGGGTGACAGGGGAG
