# Supplementary material for: Identification and Functional Annotation of Genes Related to Horses’ Performance: From GWAS to Post-GWAS
Source: MDPI journal article supplement (doi:10.3390/ani10071173), 2020-07-10
Supplement: s1 [file s1]

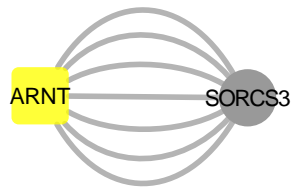

Gene-Transcription Factor (TF) network of the gene identified on Group 4. Yellow rounded square node represent the TF associated with candidate gene (circle node) related with horse performance. The node size corresponds to the network analyses (Cytoscape; Shannon et al., 2003) in which the larger nodes correspond to a higher edge density associated with the number of TF binding sites.
