# Supplementary material for: Identification and Functional Annotation of Genes Related to Horses’ Performance: From GWAS to Post-GWAS
Source: MDPI journal article supplement (doi:10.3390/ani10071173), 2020-07-10
Supplement: s1 [file s1]

```
;TFM Explorer
;Date           : Wed May 13 06:38:01 2020
;Scanned location : -3000:300
;Scanned sequences : None (46 sequences)
;Scanned matrices : (130 matrices)
;Parameters      : minsize= 30, maxsize= 1500, ratio=3.0, top=25
;
; headers
;   1   rank           window rank
;   2   matrix         matrix name
;   3   tf             transcription factor name
;   4   info           information of content of the matrix
;   5   gc             gc content of the matrix (G+C)%
;   6   location       location of the window (relatively to TSS)
;   7   pvalue         pvalue of the window
```

```
1   MA0080.2          SPI1      9.64024729829   0.435374151649   -1423:-1154
3.56627272327e-08
```

## list of hits

|         |       |       |   |      |          |
|---------|-------|-------|---|------|----------|
| LRR1Q1  | -1387 | -1380 | - | 6.42 | ACTTTCT  |
| CORO2B  | -1275 | -1268 | + | 6.81 | AGGAAGC  |
| CORO2B  | -1264 | -1257 | - | 6.28 | ACTTCCG  |
| ITGA11  | -1311 | -1304 | - | 6.78 | ATTTCCCT |
| FEM1B   | -1211 | -1204 | - | 8.65 | ACTTCCT  |
| RSU1    | -1282 | -1275 | + | 6.31 | AGGAAGA  |
| C1QL3   | -1312 | -1305 | + | 6.81 | AGGAAGC  |
| C1QL3   | -1273 | -1266 | - | 6.81 | GCTTCCT  |
| PTER    | -1309 | -1302 | - | 6.31 | TCTTCCT  |
| PTER    | -1179 | -1172 | - | 6.78 | ATTTCCCT |
| BET1    | -1322 | -1315 | + | 6.42 | AGAAAGT  |
| TFPI2   | -1415 | -1408 | + | 6.31 | AGGAAGA  |
| GNG11   | -1275 | -1268 | - | 6.45 | ACTTCTT  |
| GNGT1   | -1392 | -1385 | + | 8.65 | AGGAAGT  |
| GNGT1   | -1326 | -1319 | + | 6.31 | AGGAAGA  |
| CLRN2   | -1192 | -1185 | - | 6.28 | ACTTCCG  |
| LAP3    | -1372 | -1365 | + | 8.65 | AGGAAGT  |
| MED28   | -1292 | -1285 | - | 6.28 | AGTTCCCT |
| MED28   | -1242 | -1235 | + | 6.42 | AGAAAGT  |
| FAM184B | -1350 | -1343 | + | 6.31 | AGGAAGA  |
| FAM184B | -1316 | -1309 | - | 6.31 | TCTTCCT  |
| GLB1L2  | -1304 | -1297 | - | 8.65 | ACTTCCT  |
| B3GAT1  | -1295 | -1288 | - | 8.65 | ACTTCCT  |
| TMEM215 | -1361 | -1354 | - | 6.96 | ACTTCCC  |
| TMEM215 | -1198 | -1191 | - | 6.31 | TCTTCCT  |
| NDUFB6  | -1326 | -1319 | - | 6.31 | TCTTCCT  |
| TOPORS  | -1273 | -1266 | - | 6.96 | ACTTCCC  |
| ACO1    | -1323 | -1316 | - | 8.65 | ACTTCCT  |
| ACO1    | -1223 | -1216 | + | 6.42 | AGAAAGT  |
| DDX58   | -1394 | -1387 | + | 8.65 | AGGAAGT  |
| DDX58   | -1216 | -1209 | + | 6.31 | AGGAAGA  |
| DDX58   | -1164 | -1157 | + | 6.31 | AGGAAGA  |
| PKHD1   | -1202 | -1195 | + | 6.81 | AGGAAGC  |
| RASAL1  | -1399 | -1392 | + | 6.96 | GGGAAGT  |
| RASAL1  | -1391 | -1384 | - | 8.65 | ACTTCCT  |
| DDX54   | -1158 | -1151 | + | 6.31 | AGGAAGA  |
| PLBD2   | -1419 | -1412 | + | 6.31 | AGGAAGA  |
| PLBD2   | -1385 | -1378 | - | 6.31 | TCTTCCT  |
| SDSL    | -1421 | -1414 | - | 6.31 | TCTTCCT  |
| TTC23L  | -1423 | -1416 | + | 6.81 | AGGAAGC  |
| TTC23L  | -1389 | -1382 | - | 6.31 | TCTTCCT  |
| TTC23L  | -1236 | -1229 | - | 6.45 | ACTTCTT  |
| BRIX1   | -1375 | -1368 | - | 6.96 | ACTTCCC  |
| RAD1    | -1384 | -1377 | + | 6.78 | AGGAAAT  |
| RAD1    | -1252 | -1245 | - | 6.31 | TCTTCCT  |
| AGXT2   | -1154 | -1147 | + | 6.28 | AGGAAGT  |
| DNAJC21 | -1155 | -1148 | - | 6.31 | TCTTCCT  |
| PRLR    | -1234 | -1227 | + | 6.81 | AGGAAGC  |
| PRLR    | -1185 | -1178 | - | 6.31 | TCTTCCT  |

|       |       |       |   |      |         |
|-------|-------|-------|---|------|---------|
| RAI14 | -1387 | -1380 | + | 6.45 | AAGAAGT |
| RAI14 | -1327 | -1320 | + | 6.31 | AGGAAGA |
| RAI14 | -1252 | -1245 | + | 8.65 | AGGAAGT |

2 MA0031.1 FOXD1 11.9264176032 0.27500000177 -1819:-1739  
8.25901485677e-07

list of hits

|         |       |       |   |      |           |
|---------|-------|-------|---|------|-----------|
| FEM1B   | -1774 | -1766 | - | 6.77 | TTGTTTAA  |
| BET1    | -1787 | -1779 | + | 6.77 | ATAAACAA  |
| MED28   | -1818 | -1810 | + | 6.85 | GTAAATAT  |
| MED28   | -1786 | -1778 | + | 5.88 | GTAAATAG  |
| MED28   | -1761 | -1753 | + | 6.77 | ATAAACAA  |
| GLB1L2  | -1768 | -1760 | + | 9.69 | GTAAACAT  |
| TMEM215 | -1757 | -1749 | + | 5.94 | CTAAACAG  |
| TOPORS  | -1801 | -1793 | + | 6.91 | TTAAACAT  |
| ACO1    | -1747 | -1739 | + | 6.66 | GTCAACAA  |
| DDX58   | -1808 | -1800 | + | 6.72 | GTAAAAAA  |
| DTX1    | -1739 | -1731 | + | 6.77 | ATAAACAA  |
| _IQCD   | -1814 | -1806 | - | 6.72 | TTTTTTTAC |
| TPCN1   | -1744 | -1736 | + | 6.85 | GTAACCAT  |
| PLBD2   | -1799 | -1791 | - | 5.94 | CTGTTTAT  |
| PLBD2   | -1774 | -1766 | - | 6.72 | TTTTTTTAC |
| SDS     | -1775 | -1767 | + | 6.66 | GTCAACAA  |
| TTC23L  | -1819 | -1811 | - | 6.91 | ATGTTTAA  |
| RAI14   | -1761 | -1753 | + | 6.85 | GTAAGCAT  |

3 MA0259.1 HIF1A::ARNT 9.73982402355 0.657451923937 -2309:-2025  
9.9483690962e-07

list of hits

|         |       |       |   |      |          |
|---------|-------|-------|---|------|----------|
| ITGA11  | -2114 | -2106 | - | 7.13 | TCACGTCC |
| QDPR    | -2292 | -2284 | - | 7.14 | CCACGTAC |
| MED28   | -2267 | -2259 | + | 7.45 | CCACGTGC |
| GLB1L2  | -2267 | -2259 | - | 6.64 | CCACGTCT |
| TMEM215 | -2230 | -2222 | + | 7.08 | GCACGTGG |
| RASAL1  | -2309 | -2301 | - | 7.23 | CCACGTCC |
| CFAP73  | -2048 | -2040 | + | 7.13 | GGACGTGA |
| DDX54   | -2232 | -2224 | - | 6.95 | GCACGCCC |
| TPCN1   | -2269 | -2261 | + | 6.95 | GGACGTGT |
| TPCN1   | -2230 | -2222 | + | 7.41 | ACACGTGC |
| SDS     | -2025 | -2017 | + | 7.41 | ACACGTGC |
| TTC23L  | -2245 | -2237 | + | 7.45 | CCACGTGC |
| TTC23L  | -2164 | -2156 | - | 7.61 | GCACGTGC |
| AGXT2   | -2128 | -2120 | + | 6.54 | AGACGTGA |
| AGXT2   | -2087 | -2079 | + | 6.79 | GCACGTGT |

4 MA0259.1 HIF1A::ARNT 9.73982402355 0.657451923937 -333:55  
3.76114574543e-06

list of hits

|         |       |      |   |      |          |
|---------|-------|------|---|------|----------|
| CORO2B  | -0333 | -325 | + | 6.95 | GGGCGTGC |
| CORO2B  | +0041 | 49   | - | 6.39 | GCACGCCG |
| FEM1B   | +0036 | 44   | - | 6.79 | GCACGCGC |
| RSU1    | -0219 | -211 | - | 6.97 | TCACGTGC |
| RSU1    | -0121 | -113 | + | 7.13 | GGACGTGA |
| C1QL3   | +0012 | 20   | + | 7.08 | GCACGTGG |
| BET1    | +0055 | 63   | + | 6.64 | AGACGTGG |
| TFPI2   | -0282 | -274 | + | 6.55 | ATACGTGG |
| QDPR    | -0219 | -211 | + | 6.55 | ATACGTGG |
| QDPR    | -0124 | -116 | - | 6.95 | GCACGCCC |
| QDPR    | +0011 | 19   | + | 6.95 | GGGCGTGC |
| LAP3    | -0321 | -313 | + | 6.79 | GCGCGTGC |
| LAP3    | -0290 | -282 | - | 6.86 | GCACGCAC |
| LAP3    | -0154 | -146 | - | 6.95 | GCACGCCC |
| LAP3    | -0026 | -18  | + | 7.45 | CCACGTGC |
| MED28   | -0123 | -115 | + | 7.57 | AGACGTGC |
| FAM184B | -0325 | -317 | - | 6.59 | CCACGTAG |
| FAM184B | -0253 | -245 | + | 8.00 | GCACGTGC |
| FAM184B | -0044 | -36  | - | 6.97 | TCACGTGC |
| DDX58   | -0272 | -264 | - | 6.86 | ACACGTAC |
| DDX58   | -0070 | -62  | - | 6.30 | GCACGCAG |

|        |       |      |   |      |          |
|--------|-------|------|---|------|----------|
| OAS2   | -0116 | -108 | + | 6.97 | GCACGTGA |
| DDX54  | -0269 | -261 | + | 7.61 | CGACGTGC |
| DDX54  | +0040 | 48   | - | 6.86 | GCACGCAC |
| DTX1   | -0074 | -66  | - | 6.38 | TCACGTGT |
| _IQCD  | -0201 | -193 | - | 7.13 | TCACGTCC |
| RITA1  | -0281 | -273 | + | 6.86 | GTGCGTGC |
| RITA1  | +0028 | 36   | - | 7.61 | GCACGTGC |
| TPCN1  | -0057 | -49  | + | 7.13 | GGACGTGA |
| SLC8B1 | -0201 | -193 | - | 6.45 | TCACGTAT |
| SDSL   | -0128 | -120 | + | 8.00 | GCACGTGC |
| LHX5   | -0061 | -53  | + | 7.51 | CTACGTGC |
| BRIX1  | -0294 | -286 | - | 6.40 | GCACGTTG |
| RAD1   | -0321 | -313 | + | 6.79 | GCGCGTGC |
| RAI14  | -0075 | -67  | + | 6.52 | CCACGTGG |

5 MA0087.1 Sox5 10.8307137621 0.198757763952 -1426:-1190  
5.79285645001e-06

## list of hits

|         |       |       |   |      |         |
|---------|-------|-------|---|------|---------|
| LRRIQ1  | -1282 | -1275 | + | 5.34 | AAGCAAT |
| LRRIQ1  | -1212 | -1205 | - | 5.34 | ATTGCTT |
| LRRIQ1  | -1190 | -1183 | - | 5.34 | ATTATTT |
| FEM1B   | -1326 | -1319 | - | 5.39 | ATTGTAT |
| FEM1B   | -1259 | -1252 | + | 5.34 | AAACACT |
| C1QL3   | -1385 | -1378 | - | 5.34 | AGTGTTA |
| C1QL3   | -1194 | -1187 | + | 5.39 | ATACAAT |
| PTER    | -1411 | -1404 | + | 5.34 | TAGCAAT |
| BET1    | -1305 | -1298 | - | 5.34 | ATTATTT |
| BET1    | -1241 | -1234 | - | 5.39 | ATTGTAA |
| GNGT1   | -1299 | -1292 | - | 8.38 | ATTGTTT |
| QDPR    | -1426 | -1419 | + | 5.39 | TTACAAT |
| QDPR    | -1419 | -1412 | - | 5.34 | AGTGTTA |
| CLRN2   | -1223 | -1216 | + | 8.38 | TAACAAT |
| FAM184B | -1283 | -1276 | - | 5.34 | ATTATTA |
| TMEM215 | -1324 | -1317 | + | 5.39 | TGACAAT |
| NDUFB6  | -1413 | -1406 | - | 8.38 | ATTGTTT |
| NDUFB6  | -1290 | -1283 | + | 5.39 | ATACAAT |
| NDUFB6  | -1217 | -1210 | + | 5.39 | TGACAAT |
| NDUFB6  | -1190 | -1183 | + | 7.69 | CAACAAT |
| TOPORS  | -1327 | -1320 | - | 5.34 | ATTGCTT |
| ACO1    | -1309 | -1302 | + | 5.34 | AAATAAT |
| DDX58   | -1248 | -1241 | + | 5.34 | AAGCAAT |
| OAS2    | -1424 | -1417 | + | 5.34 | AAATAAT |
| CFAP73  | -1389 | -1382 | + | 5.39 | TGACAAT |
| CFAP73  | -1289 | -1282 | - | 5.34 | AGTGTTT |
| _IQCD   | -1420 | -1413 | - | 5.39 | ATTGTCT |
| _IQCD   | -1342 | -1335 | - | 5.39 | ATTGTCA |
| RITA1   | -1218 | -1211 | + | 5.34 | TAGCAAT |
| TPCN1   | -1398 | -1391 | - | 5.39 | ATTGTAT |
| TPCN1   | -1347 | -1340 | - | 5.34 | ATTGCTT |
| SDSL    | -1199 | -1192 | - | 7.69 | ATTGTTG |
| LHX5    | -1315 | -1308 | + | 5.39 | ATACAAT |
| TTC23L  | -1205 | -1198 | - | 8.38 | ATTGTTT |
| BRIX1   | -1282 | -1275 | - | 5.34 | ATTATTA |
| BRIX1   | -1249 | -1242 | + | 5.34 | AAACACT |
| AGXT2   | -1332 | -1325 | - | 5.34 | AGTGTTT |
| AGXT2   | -1250 | -1243 | + | 7.41 | GAACAAT |
| DNAJC21 | -1411 | -1404 | - | 5.39 | ATTGTCT |
| DNAJC21 | -1394 | -1387 | + | 5.39 | ATACAAT |

6 MA0067.1 Pax2 6.20567064398 0.516129044515 -1410:-1244  
9.15373698354e-06

## list of hits

|        |       |       |   |      |          |
|--------|-------|-------|---|------|----------|
| LRRIQ1 | -1410 | -1402 | - | 5.99 | AAGTGAAT |
| ALX1   | -1310 | -1302 | - | 5.85 | GCGTGATT |
| CORO2B | -1316 | -1308 | - | 5.94 | ACGTGACC |
| FEM1B  | -1317 | -1309 | + | 5.89 | TGTCACCT |
| FEM1B  | -1244 | -1236 | + | 6.26 | GGTCACGG |
| TFPI2  | -1398 | -1390 | - | 6.41 | CCATGACA |
| LAP3   | -1301 | -1293 | - | 6.20 | CAGTGACA |

|         |       |       |   |      |          |
|---------|-------|-------|---|------|----------|
| TMEM215 | -1366 | -1358 | - | 6.20 | ACATGACT |
| ACO1    | -1274 | -1266 | - | 6.41 | GCATGACA |
| DDX58   | -1391 | -1383 | - | 5.89 | AAGTGACA |
| RASAL1  | -1396 | -1388 | - | 5.99 | AAGTGACT |
| TPCN1   | -1297 | -1289 | - | 5.99 | AAGTGACT |
| SDSL    | -1343 | -1335 | - | 5.99 | AAGTGACT |
| SDSL    | -1318 | -1310 | - | 5.85 | GCGTGATT |
| SDSL    | -1253 | -1245 | + | 5.84 | CGTCATGT |
| TTC23L  | -1334 | -1326 | - | 6.51 | CCATGACT |
| DNAJC21 | -1340 | -1332 | - | 5.99 | AAGTGACT |
| DNAJC21 | -1279 | -1271 | + | 5.89 | TGTCACCT |

7 MA0136.1 ELF5 8.69309550562 0.429292928841 -1399:-1293  
2.17710570593e-05

list of hits

|         |       |       |   |      |            |
|---------|-------|-------|---|------|------------|
| ITGA11  | -1312 | -1303 | + | 8.56 | TATTTCCCTT |
| PTER    | -1310 | -1301 | + | 6.19 | CTCTTCCTT  |
| GNGT1   | -1393 | -1384 | - | 7.93 | AAGGAAGTG  |
| GNGT1   | -1340 | -1331 | - | 7.33 | AAGGATATT  |
| GNGT1   | -1327 | -1318 | - | 6.34 | CAGGAAGAA  |
| QDPR    | -1324 | -1315 | + | 6.82 | TTTTTCCTT  |
| CLRN2   | -1303 | -1294 | - | 6.31 | AAGGAAAAT  |
| LAP3    | -1373 | -1364 | - | 8.08 | CAGGAAGTA  |
| MED28   | -1293 | -1284 | + | 7.35 | TAGTTCCTT  |
| FAM184B | -1338 | -1329 | - | 6.64 | ACGGATGTT  |
| GLB1L2  | -1305 | -1296 | + | 7.77 | TACTTCCTC  |
| B3GAT1  | -1397 | -1388 | - | 6.82 | AAGGAAAAA  |
| B3GAT1  | -1296 | -1287 | + | 7.26 | AACTTCCTC  |
| TOPORS  | -1398 | -1389 | + | 6.43 | TATTTCCCT  |
| ACO1    | -1324 | -1315 | + | 7.93 | CACTTCCTT  |
| DDX58   | -1395 | -1386 | - | 6.30 | TAGGAAGTG  |
| RASAL1  | -1392 | -1383 | + | 6.21 | GACTTCCTG  |
| PLBD2   | -1399 | -1390 | + | 6.64 | AACATCCGT  |
| TTC23L  | -1390 | -1381 | + | 6.48 | ATCTTCCTT  |
| RAD1    | -1385 | -1376 | - | 6.81 | GAGGAAATG  |
| RAD1    | -1342 | -1333 | + | 7.35 | TAGTTCCTT  |

8 MA0131.1 MIZF 13.1966528521 0.610000000149 -1995:-1765  
3.10860638316e-05

list of hits

|              |       |       |   |      |            |
|--------------|-------|-------|---|------|------------|
| CORO2B       | -1884 | -1874 | - | 5.28 | GAGGGCGTTC |
| ITGA11       | -1765 | -1755 | - | 7.97 | ACGGACTTTG |
| RSU1         | -1990 | -1980 | - | 5.23 | CCGGAAGTAA |
| LOC100072895 | -1945 | -1935 | + | 5.00 | GTAGGTCCGG |
| TOPORS       | -1784 | -1774 | + | 4.85 | TTACTTCCTC |
| RASAL1       | -1921 | -1911 | - | 5.84 | CAGGACGTTG |
| CFAP73       | -1834 | -1824 | + | 5.99 | TAACGTCCTG |
| CFAP73       | -1791 | -1781 | + | 5.14 | GAACGGCCGC |
| SLC8B1       | -1796 | -1786 | + | 6.53 | CTAGGTCCGT |
| SDS          | -1964 | -1954 | + | 6.51 | CAACTTCCGA |
| LHX5         | -1995 | -1985 | + | 5.23 | TAAATTCCTG |
| RAI14        | -1869 | -1859 | - | 4.40 | AAGGACCTTG |
| RAI14        | -1796 | -1786 | - | 5.52 | GCTGACGTTA |

9 MA0143.1 Sox2 12.9512704469 0.361474939125 -781:-704  
3.70170555013e-05

list of hits

|        |       |      |   |      |                  |
|--------|-------|------|---|------|------------------|
| LRR1Q1 | -0761 | -746 | + | 5.90 | TAATTCCTTATGTTGA |
| LRR1Q1 | -0711 | -696 | + | 6.10 | CTATTTTCCTTTGAAA |
| TFPI2  | -0714 | -699 | - | 5.02 | TCTCAAAAACAGTAG  |
| GNG11  | -0764 | -749 | + | 5.47 | TTATTCCTTCTCTAG  |
| GNGT1  | -0766 | -751 | - | 7.03 | GGTGCAGAAGAAAGA  |
| GNGT1  | -0744 | -729 | + | 7.34 | CTTTTATGATGTACA  |
| GNGT1  | -0704 | -689 | + | 5.10 | CCTTTAACCTGCTGT  |
| QDPR   | -0750 | -735 | - | 5.61 | CTAGCAGACCAAAGA  |
| LAP3   | -0755 | -740 | + | 6.17 | GCATTTTTTTTACAAA |
| LAP3   | -0726 | -711 | - | 7.05 | TTTAAAAAAGAAAAA  |
| MED28  | -0772 | -757 | + | 7.05 | TTTTTCTTTTTTAAA  |
| MED28  | -0712 | -697 | + | 5.17 | TTTTTCTTCTGCTTT  |

|         |       |      |   |      |                 |
|---------|-------|------|---|------|-----------------|
| FAM184B | -0781 | -766 | + | 5.65 | CCTTTGTTCCGTGAT |
| GLB1L2  | -0737 | -722 | + | 6.62 | CCATTCTTCTGTCAG |
| TOPORS  | -0714 | -699 | - | 5.67 | GATGCAGCAGAATGA |
| OAS2    | -0742 | -727 | + | 6.29 | CCTTTGTCTTCTGTA |
| CFAP73  | -0780 | -765 | - | 6.10 | TGTGAAAAAAATGA  |
| DDX54   | -0708 | -693 | - | 5.18 | TACAGATGACAAAAC |
| RAD1    | -0706 | -691 | - | 6.18 | ACCGCATAACAAGGG |
| DNAJC21 | -0722 | -707 | + | 6.02 | GCATTCTTAACCTAA |

10 MA0122.1 Nkx3-2 8.54224970754 0.462962961859 -1177:-1110  
4.32905859778e-05

## list of hits

|              |       |       |       |      |                |
|--------------|-------|-------|-------|------|----------------|
| ITGA11       | -1177 | -1168 | +     | 6.88 | CTGAGTGGG      |
| CLRN2        | -1161 | -1152 | -     | 6.26 | GCCACTTCT      |
| LAP3         | -1125 | -1116 | +     | 6.22 | TGAAGTGAA      |
| LOC100072895 |       | -1166 | -1157 | -    | 6.11 CCCACTCCA |
| LOC100072895 |       | -1154 | -1145 | +    | 6.15 CCAAGTGCA |
| TMEM215      | -1144 | -1135 | +     | 6.37 | CTGAGTAGA      |
| TMEM215      | -1114 | -1105 | +     | 6.69 | TGGAGTGGA      |
| TOPORS       | -1138 | -1129 | +     | 6.84 | CCAAGTGGA      |
| RASAL1       | -1171 | -1162 | -     | 6.13 | GTCACTCAG      |
| CFAP73       | -1137 | -1128 | +     | 6.84 | CCAAGTGGA      |
| _IQCD        | -1116 | -1107 | +     | 6.26 | GGAAGTGGC      |
| RITA1        | -1110 | -1101 | -     | 6.53 | GGCACTCAG      |
| TPCN1        | -1138 | -1129 | -     | 6.53 | GGCACTCAG      |
| PLBD2        | -1168 | -1159 | -     | 6.37 | TCTACTCAG      |

11 MA0145.1 Tcfcp2l1 11.6502911816 0.609628129495 -1339:-1287  
4.97937789201e-05

## list of hits

|              |       |       |       |      |                      |
|--------------|-------|-------|-------|------|----------------------|
| C1QL3        | -1298 | -1284 | +     | 5.86 | CCAGTTAAGACCAT       |
| MED28        | -1339 | -1325 | +     | 5.53 | CCACTTCTGTCTG        |
| LOC100072895 |       | -1287 | -1273 | -    | 5.33 CTGCCCTGGCGCAGG |
| B3GAT1       | -1334 | -1320 | -     | 5.87 | CTGCACTGGGCAGG       |
| DTX1         | -1317 | -1303 | +     | 6.08 | CCAGAAAAATGCAG       |
| RITA1        | -1336 | -1322 | +     | 5.48 | CAAGGTTGGGCCAG       |
| RITA1        | -1313 | -1299 | +     | 5.75 | CCGGGCTGCACCAG       |
| RITA1        | -1289 | -1275 | -     | 5.75 | CTGGCCTGAGCCAC       |
| SLC8B1       | -1287 | -1273 | +     | 5.33 | CCAGTCCCATGTTG       |
| SDS          | -1316 | -1302 | -     | 6.45 | CCGGCCTCGCCTGG       |
| LHX5         | -1298 | -1284 | +     | 5.80 | CAAGTGTAAGCTAG       |
| RAI14        | -1306 | -1292 | -     | 5.85 | TTGCTTTGAACTGG       |

12 MA0004.1 Arnt 10.9916749403 0.641666668778 -419:13 5.51564255093e-05

## list of hits

|         |       |      |   |      |        |
|---------|-------|------|---|------|--------|
| RSU1    | -0218 | -212 | + | 8.00 | CACGTG |
| C1QL3   | +0013 | 19   | + | 8.00 | CACGTG |
| LAP3    | -0403 | -397 | + | 8.00 | CACGTG |
| LAP3    | -0397 | -391 | + | 8.00 | CACGTG |
| LAP3    | -0025 | -19  | + | 8.00 | CACGTG |
| MED28   | -0040 | -34  | + | 8.00 | CACGTG |
| FAM184B | -0380 | -374 | + | 8.00 | CACGTG |
| FAM184B | -0252 | -246 | + | 8.00 | CACGTG |
| FAM184B | -0043 | -37  | + | 8.00 | CACGTG |
| NDUFB6  | -0419 | -413 | + | 8.00 | CACGTG |
| TOPORS  | -0193 | -187 | + | 8.00 | CACGTG |
| OAS2    | -0115 | -109 | + | 8.00 | CACGTG |
| RASAL1  | -0379 | -373 | + | 8.00 | CACGTG |
| DTX1    | -0073 | -67  | + | 8.00 | CACGTG |
| PLBD2   | +0003 | 9    | + | 8.00 | CACGTG |
| SDSL    | -0127 | -121 | + | 8.00 | CACGTG |
| RAI14   | -0074 | -68  | + | 8.00 | CACGTG |

13 MA0156.1 FEV 12.1208832256 0.442307695746 -2003:-1856  
7.05488822314e-05

## list of hits

|        |       |       |   |      |          |
|--------|-------|-------|---|------|----------|
| LRRIQ1 | -1875 | -1867 | + | 5.79 | AGGGAAGT |
| LRRIQ1 | -1856 | -1848 | + | 5.26 | TGGGAAAT |
| ALX1   | -2003 | -1995 | + | 7.28 | TAGGAAGT |

|         |       |       |   |      |           |
|---------|-------|-------|---|------|-----------|
| FEM1B   | -1996 | -1988 | + | 8.11 | AAGGAAAT  |
| RSU1    | -1990 | -1982 | + | 8.36 | CCGGAAGT  |
| RSU1    | -1950 | -1942 | - | 5.94 | ATTTCCCT  |
| RSU1    | -1884 | -1876 | + | 8.11 | AAGGAAAT  |
| QDPR    | -1991 | -1983 | + | 6.99 | CAGGATGT  |
| LAP3    | -1891 | -1883 | + | 5.26 | GGGGAAAT  |
| TMEM215 | -1878 | -1870 | + | 8.11 | AAGGAAAT  |
| NDUFB6  | -1972 | -1964 | - | 7.43 | ATTTCCCTA |
| ACO1    | -1957 | -1949 | - | 7.43 | ATTTCCCTC |
| PKHD1   | -1883 | -1875 | + | 7.96 | AAGGAAGT  |
| OAS2    | -1982 | -1974 | - | 7.43 | ATTTCCCTC |
| DTX1    | -1883 | -1875 | - | 7.28 | ACTTCCTC  |
| TPCN1   | -1955 | -1947 | + | 5.26 | GGGGAAAT  |
| PLBD2   | -1898 | -1890 | - | 5.26 | ATTTCCCC  |
| SDS     | -1962 | -1954 | - | 6.19 | ACTTCCGA  |
| TTC23L  | -1869 | -1861 | - | 5.79 | ACTTCCCT  |
| AGXT2   | -1861 | -1853 | - | 5.11 | ACTTCCCA  |

14 MA0002.2 RUNX1 10.4014248352 0.501590918453 -877:-805  
7.14859891226e-05

list of hits

|        |       |      |   |      |             |
|--------|-------|------|---|------|-------------|
| RSU1   | -0842 | -831 | - | 6.26 | AAAGCACAGAT |
| C1QL3  | -0877 | -866 | - | 5.93 | AACACACAGAA |
| BET1   | -0875 | -864 | - | 7.76 | AAACCGCAAAC |
| TFPI2  | -0814 | -803 | - | 6.51 | AAAACACAAAT |
| B3GAT1 | -0805 | -794 | + | 6.94 | TCCTGTGGCTC |
| DDX58  | -0862 | -851 | - | 6.75 | ACACCACAACA |
| DDX58  | -0820 | -809 | - | 5.68 | AACCCAAAGAC |
| DDX58  | -0805 | -794 | - | 6.09 | AAATCACAGAA |
| PKHD1  | -0822 | -811 | - | 6.00 | AAAACACAAGT |
| OAS2   | -0835 | -824 | - | 6.21 | TGACCACACAT |
| CFAP73 | -0852 | -841 | + | 6.39 | TTCTGTGTCTT |
| DTX1   | -0867 | -856 | - | 7.36 | CACCCACAGGC |
| SDSL   | -0877 | -866 | + | 6.83 | GTCTGTGTTCT |
| SDSL   | -0835 | -824 | - | 8.22 | AAACCACAATT |
| PRLR   | -0875 | -864 | - | 7.55 | AAACCTCAGAG |
| PRLR   | -0807 | -796 | + | 6.86 | GCCAGTGGTTT |

15 MA0036.1 GATA2 5.68777361321 0.403773584962 -1387:-1332  
7.57797974028e-05

list of hits

|        |       |       |   |      |       |
|--------|-------|-------|---|------|-------|
| CORO2B | -1356 | -1351 | - | 4.95 | TATCC |
| TFPI2  | -1387 | -1382 | + | 4.95 | GGATA |
| TFPI2  | -1346 | -1341 | - | 4.95 | TATCC |
| GNGT1  | -1338 | -1333 | + | 4.95 | GGATA |
| LAP3   | -1381 | -1376 | + | 4.95 | GGATA |
| LAP3   | -1361 | -1356 | - | 4.95 | TATCC |
| TOPORS | -1336 | -1331 | - | 4.95 | TATCC |
| DDX58  | -1345 | -1340 | + | 4.95 | GGATA |
| CFAP73 | -1367 | -1362 | + | 4.95 | GGATA |
| TPCN1  | -1374 | -1369 | - | 4.95 | TATCC |
| PRLR   | -1332 | -1327 | + | 4.95 | GGATA |
| RAI14  | -1338 | -1333 | + | 4.95 | GGATA |

16 MA0058.1 MAX 12.6854143903 0.57058823479 -1942:-1902  
9.02629412533e-05

list of hits

|        |       |       |   |      |            |
|--------|-------|-------|---|------|------------|
| RSU1   | -1916 | -1906 | - | 4.50 | ACATGTGGGT |
| PTER   | -1904 | -1894 | + | 6.90 | ACACACGTGC |
| TOPORS | -1910 | -1900 | - | 7.36 | CCATGTGGTT |
| OAS2   | -1927 | -1917 | + | 6.42 | GGACACATGA |
| OAS2   | -1905 | -1895 | - | 5.52 | ACATGTGACC |
| RASAL1 | -1942 | -1932 | + | 5.60 | CACCCCGTGG |
| BRIX1  | -1902 | -1892 | + | 4.81 | GACCCCATGA |
| PRLR   | -1941 | -1931 | + | 4.34 | AACCTCGTGA |

17 MA0091.1 TAL1::TCF3 14.0701377852 0.452651524916 -1461:-1392  
9.72366660183e-05

list of hits

|         |       |       |   |      |              |
|---------|-------|-------|---|------|--------------|
| PTER    | -1458 | -1446 | + | 7.96 | GATCCATCTGTT |
| GNGT1   | -1425 | -1413 | - | 5.28 | AATAGATGTTTG |
| CLRN2   | -1415 | -1403 | + | 5.02 | CAAGCATATGGT |
| NDUFB6  | -1442 | -1430 | - | 5.71 | TAAAGATGTTCC |
| DDX58   | -1414 | -1402 | + | 4.62 | TAGACATCTTTT |
| DTX1    | -1402 | -1390 | - | 4.46 | AACATAAGGTTG |
| PLBD2   | -1453 | -1441 | + | 8.75 | CTAACATCTGCT |
| SDS     | -1451 | -1439 | + | 5.29 | GGGCCAGCTGTG |
| BRIX1   | -1409 | -1397 | - | 6.29 | AACAAATGTTCT |
| DNAJC21 | -1461 | -1449 | + | 9.23 | AGTCCATCTGTT |
| DNAJC21 | -1448 | -1436 | - | 7.83 | AAAAGATGTTCC |
| PRLR    | -1392 | -1380 | + | 4.97 | ACACCATCTTGG |
