# Supplementary material for: Identification and Functional Annotation of Genes Related to Horses’ Performance: From GWAS to Post-GWAS
Source: MDPI journal article supplement (doi:10.3390/ani10071173), 2020-07-10
Supplement: s1 [file s1]

## ;TFM Explorer

```
;Date      : Wed May 13 06:33:31 2020
;Scanned location : -3275:0
;Scanned sequences : None (178 sequences)
;Scanned matrices : (130 matrices)
;Parameters      : minsize= 30, maxsize= 1500, ratio=3.0, top=25
```

## ; headers

```
; 1 rank          window rank
; 2 matrix        matrix name
; 3 tf            transcription factor name
; 4 info          information of content of the matrix
; 5 gc            gc content of the matrix (G+C)%
; 6 location      location of the window (relatively to TSS)
; 7 pvalue        pvalue of the window
```

```
1 MA0089.1      NFE2L1::MafG      7.93814372721    0.421568617371  -486:-313
2.80696885964e-10
```

## list of hits

|               |       |       |      |      |        |        |
|---------------|-------|-------|------|------|--------|--------|
| MIR331        | -0471 | -465  | +    | 6.66 | CATGAC |        |
| MIR135A-2     |       | -0334 | -328 | -    | 6.66   | GTCATG |
| ART4          | -0485 | -479  | +    | 6.66 | CATGAC |        |
| GRI.2B        | -0380 | -374  | +    | 6.66 | CATGAC |        |
| GSG1          | -0444 | -438  | +    | 6.57 | GATGAC |        |
| MIR9170       | -0321 | -315  | +    | 6.66 | CATGAC |        |
| PIP5K1B       | -0313 | -307  | -    | 6.66 | GTCATG |        |
| TJP2          | -0391 | -385  | +    | 6.66 | CATGAC |        |
| TJP2          | -0313 | -307  | -    | 6.66 | GTCATG |        |
| MAMDC2        | -0364 | -358  | +    | 6.66 | CATGAC |        |
| LOC100052901  |       | -0476 | -470 | -    | 6.57   | GTCATC |
| LOC100052951  |       | -0458 | -452 | -    | 6.57   | GTCATC |
| LOC100052951  |       | -0397 | -391 | -    | 6.57   | GTCATC |
| LOC100052638  |       | -0397 | -391 | -    | 6.57   | GTCATC |
| LOC100052638  |       | -0336 | -330 | -    | 6.57   | GTCATC |
| LOC100052689  |       | -0412 | -406 | -    | 6.57   | GTCATC |
| LOC100052689  |       | -0351 | -345 | -    | 6.57   | GTCATC |
| _LOC100049805 |       | -0469 | -463 | -    | 6.57   | GTCATC |
| LOC100052229  |       | -0414 | -408 | -    | 6.57   | GTCATC |
| LOC100052292  |       | -0486 | -480 | -    | 6.57   | GTCATC |
| SPRYD7        | -0374 | -368  | +    | 6.57 | GATGAC |        |
| R.ASEH2B      |       | -0410 | -404 | -    | 6.57   | GTCATC |
| PSMB2         | -0336 | -330  | -    | 6.57 | GTCATC |        |
| ZMYM4         | -0473 | -467  | +    | 6.66 | CATGAC |        |
| ZMYM4         | -0464 | -458  | -    | 6.66 | GTCATG |        |
| ZBTB6         | -0349 | -343  | -    | 6.66 | GTCATG |        |
| OR1K1         | -0428 | -422  | +    | 6.66 | CATGAC |        |
| LOC100071189  |       | -0367 | -361 | +    | 6.66   | CATGAC |
| LOC100071189  |       | -0360 | -354 | -    | 6.66   | GTCATG |
| LOC100071244  |       | -0444 | -438 | +    | 6.66   | CATGAC |
| LOC100067520  |       | -0442 | -436 | +    | 6.66   | CATGAC |
| LOC100071251  |       | -0387 | -381 | +    | 6.66   | CATGAC |
| LOC100071227  |       | -0439 | -433 | +    | 6.66   | CATGAC |
| LOC100071264  |       | -0348 | -342 | +    | 6.66   | CATGAC |
| LOC100071264  |       | -0339 | -333 | +    | 6.57   | GATGAC |
| _LOC100071297 |       | -0354 | -348 | -    | 6.57   | GTCATC |
| OR1.1         | -0459 | -453  | +    | 6.57 | GATGAC |        |
| LOC100071407  |       | -0428 | -422 | +    | 6.66   | CATGAC |
| LOC100071445  |       | -0336 | -330 | -    | 6.57   | GTCATC |
| LOC100071469  |       | -0465 | -459 | -    | 6.57   | GTCATC |

```
2 MA0130.1      ZNF354C 8.95800882514    0.614583333333  -707:-634
1.05430731724e-09
```

## list of hits

|              |       |       |      |      |        |        |
|--------------|-------|-------|------|------|--------|--------|
| PLX.C1       | -0686 | -680  | +    | 6.86 | CTCCAC |        |
| TMCC3        | -0638 | -632  | +    | 6.86 | CTCCAC |        |
| SLC01C1      | -0650 | -644  | -    | 7.01 | GTGGAT |        |
| LOC100065342 |       | -0677 | -671 | -    | 6.86   | GTGGAG |
| DGKD         | -0668 | -662  | +    | 7.01 | ATCCAC |        |

|               |       |       |      |      |        |        |
|---------------|-------|-------|------|------|--------|--------|
| EIF4E2        | -0663 | -657  | +    | 7.01 | ATCCAC |        |
| CHR.G         | -0707 | -701  | -    | 6.86 | GTGGAG |        |
| SOX5          | -0672 | -666  | -    | 6.86 | GTGGAG |        |
| SMCO3         | -0695 | -689  | +    | 6.86 | CTCCAC |        |
| ART4          | -0638 | -632  | -    | 7.01 | GTGGAT |        |
| MGP           | -0680 | -674  | +    | 7.01 | ATCCAC |        |
| H4-16         | -0651 | -645  | +    | 7.01 | ATCCAC |        |
| FOXP1         | -0648 | -642  | -    | 7.01 | GTGGAT |        |
| DMRT3         | -0641 | -635  | -    | 6.86 | GTGGAG |        |
| FOXD4         | -0634 | -628  | +    | 7.01 | ATCCAC |        |
| APBA1         | -0668 | -662  | -    | 6.86 | GTGGAG |        |
| MAMDC2        | -0636 | -630  | -    | 6.86 | GTGGAG |        |
| SMC2          | -0698 | -692  | +    | 6.86 | CTCCAC |        |
| LOC100052951  |       | -0679 | -673 | +    | 6.86   | CTCCAC |
| LOC100052638  |       | -0662 | -656 | +    | 6.86   | CTCCAC |
| LOC100052689  |       | -0674 | -668 | +    | 6.86   | CTCCAC |
| LOC100052689  |       | -0634 | -628 | +    | 6.86   | CTCCAC |
| _LOC100049805 |       | -0691 | -685 | +    | 6.86   | CTCCAC |
| LOC100052229  |       | -0679 | -673 | +    | 6.86   | CTCCAC |
| LOC100052229  |       | -0639 | -633 | +    | 6.86   | CTCCAC |
| VPS36         | -0695 | -689  | +    | 6.86 | CTCCAC |        |
| .EK5          | -0683 | -677  | -    | 6.86 | GTGGAG |        |
| WDFY2         | -0645 | -639  | +    | 6.86 | CTCCAC |        |
| R.ASEH2B      |       | -0672 | -666 | +    | 7.01   | ATCCAC |
| TE.M4         | -0690 | -684  | -    | 6.86 | GTGGAG |        |
| AGO4          | -0695 | -689  | -    | 7.01 | GTGGAT |        |
| AGO1          | -0664 | -658  | -    | 6.86 | GTGGAG |        |
| _CSF3R        | -0650 | -644  | -    | 6.86 | GTGGAG |        |
| STK40         | -0700 | -694  | -    | 6.86 | GTGGAG |        |
| LSM10         | -0644 | -638  | +    | 7.01 | ATCCAC |        |
| CLSP.         | -0660 | -654  | -    | 7.01 | GTGGAT |        |
| TFAP2E        | -0699 | -693  | +    | 6.86 | CTCCAC |        |
| ZBTB6         | -0652 | -646  | +    | 7.01 | ATCCAC |        |
| RC3H2         | -0704 | -698  | -    | 6.86 | GTGGAG |        |
| _LOC100071170 |       | -0668 | -662 | -    | 6.86   | GTGGAG |
| LOC100071338  |       | -0666 | -660 | +    | 6.86   | CTCCAC |
| LOC100071486  |       | -0706 | -700 | +    | 7.01   | ATCCAC |
| FBXO5         | -0651 | -645  | +    | 6.86 | CTCCAC |        |

3 MA0031.1 FOXD1 11.9264176032 0.27500000177 -1242:-1137  
1.991759584e-08

## list of hits

|              |       |       |       |      |          |          |
|--------------|-------|-------|-------|------|----------|----------|
| .DUFAl2      | -1228 | -1220 | +     | 6.85 | GTAAATAT |          |
| MIR135A-2    |       | -1171 | -1163 | +    | 5.88     | GTAAATAG |
| SLCO1A2      | -1241 | -1233 | -     | 6.80 | ATGTTGAC |          |
| SLCO1A2      | -1167 | -1159 | -     | 6.72 | TTGCTTAC |          |
| IAPP         | -1157 | -1149 | +     | 6.91 | ATAAACAT |          |
| .EU2         | -1161 | -1153 | +     | 6.91 | TTAAACAT |          |
| .EU2         | -1153 | -1145 | -     | 5.88 | CTGGTTAC |          |
| .EU2         | -1145 | -1137 | -     | 6.72 | TTGCTTAC |          |
| SOX5         | -1198 | -1190 | +     | 5.94 | CTAAACAG |          |
| ERP27        | -1237 | -1229 | -     | 6.91 | ATGTTTAC |          |
| H2AJ         | -1208 | -1200 | -     | 6.72 | TTATTTAC |          |
| PLBD1        | -1173 | -1165 | -     | 6.72 | TTTTTTAC |          |
| PROK2        | -1171 | -1163 | -     | 9.69 | ATGTTTAC |          |
| DMRT2        | -1142 | -1134 | +     | 6.85 | GTAACCAT |          |
| _KA.K1       | -1223 | -1215 | -     | 5.94 | CTGTTTAT |          |
| DOCK8        | -1230 | -1222 | -     | 6.72 | TTATTTAC |          |
| DOCK8        | -1193 | -1185 | +     | 6.72 | GTAACCAA |          |
| LOC100052901 |       | -1152 | -1144 | -    | 6.72     | TTTTTTAC |
| LOC100052638 |       | -1165 | -1157 | -    | 5.94     | CTGTTTAC |
| LOC100052689 |       | -1212 | -1204 | -    | 6.91     | ATGTTTAC |
| LOC100052689 |       | -1176 | -1168 | -    | 5.94     | CTGTTTAC |
| LOC100147522 |       | -1233 | -1225 | -    | 5.94     | CTGTTTAC |
| CKAP2        | -1215 | -1207 | -     | 6.72 | TTTTTTAC |          |
| .EK3         | -1225 | -1217 | -     | 6.72 | TTTTTTAC |          |
| .EK3         | -1181 | -1173 | -     | 6.80 | ATGTTGAC |          |
| ATP7B        | -1213 | -1205 | +     | 6.85 | GTAAAAAT |          |
| ATP7B        | -1192 | -1184 | -     | 6.85 | ATTTTTAC |          |

|              |       |       |       |      |          |          |
|--------------|-------|-------|-------|------|----------|----------|
| CCDC70       | -1150 | -1142 | -     | 6.77 | TTGTTTAA |          |
| DHRS12       | -1190 | -1182 | +     | 8.72 | GTAAACAG |          |
| _I.TS6       | -1164 | -1156 | -     | 5.94 | CTGTTTAT |          |
| KC.RG        | -1162 | -1154 | +     | 9.56 | GTAAACAA |          |
| MIR15A       | -1187 | -1179 | -     | 5.94 | CTGTTTAT |          |
| DLEU7        | -1137 | -1129 | +     | 5.88 | GTAAATAG |          |
| _CSF3R       | -1137 | -1129 | +     | 6.77 | ATAAACAA |          |
| SH3D21       | -1232 | -1224 | +     | 6.91 | ATAAACAT |          |
| SH3D21       | -1181 | -1173 | +     | 6.85 | GTAAAAAT |          |
| AGO3         | -1220 | -1212 | +     | 6.77 | CTAAACAA |          |
| PDCL         | -1233 | -1225 | +     | 6.72 | GTAAAAAA |          |
| LOC100071212 |       | -1193 | -1185 | +    | 6.77     | TTAAACAA |
| LOC100071244 |       | -1187 | -1179 | -    | 6.91     | ATGTTTAA |
| LOC100067520 |       | -1235 | -1227 | -    | 6.91     | ATGTTTAT |
| LOC100071251 |       | -1167 | -1159 | -    | 6.91     | ATGTTTAT |
| OR1B1        | -1137 | -1129 | +     | 5.94 | TTAAACAG |          |
| LOC100071332 |       | -1166 | -1158 | +    | 6.85     | GTAAATAT |
| LOC100071407 |       | -1225 | -1217 | -    | 6.91     | ATGTTTAT |
| LOC100071420 |       | -1152 | -1144 | -    | 6.72     | TTATTTAC |
| LOC100071420 |       | -1138 | -1130 | +    | 6.91     | TTAAACAT |
| LOC100071469 |       | -1158 | -1150 | -    | 6.91     | ATGTTTAT |
| MTRF1L       | -1223 | -1215 | +     | 6.72 | GTAACCAA |          |
| VIP          | -1166 | -1158 | -     | 6.77 | TTGTTTAA |          |
| RGS17        | -1242 | -1234 | -     | 6.85 | ATATTTAC |          |

4 MA0095.1 YY1 8.10118848971 0.509803925951 -199:-141  
5.01648758677e-08

## list of hits

|               |       |      |   |      |        |
|---------------|-------|------|---|------|--------|
| MIR135A-2     | -0186 | -180 | + | 6.58 | GCCATC |
| C6H12orf60    | -0199 | -193 | + | 6.58 | GCCATC |
| C6H12orf60    | -0173 | -167 | + | 6.58 | GCCATC |
| TMEM252       | -0157 | -151 | + | 6.58 | GCCATC |
| APBA1         | -0169 | -163 | - | 6.42 | GATGGT |
| LOC100052951  | -0150 | -144 | + | 6.42 | ACCATC |
| _LOC100049805 | -0166 | -160 | + | 6.42 | ACCATC |
| ADPRHL2       | -0159 | -153 | + | 6.58 | GCCATC |
| OR1K1         | -0156 | -150 | + | 6.58 | GCCATC |
| LOC100071212  | -0159 | -153 | + | 6.58 | GCCATC |
| LOC100071244  | -0198 | -192 | + | 6.58 | GCCATC |
| LOC100071244  | -0141 | -135 | + | 6.42 | ACCATC |
| LOC100071218  | -0159 | -153 | + | 6.58 | GCCATC |
| LOC100067520  | -0198 | -192 | + | 6.58 | GCCATC |
| LOC100067520  | -0141 | -135 | + | 6.58 | GCCATC |
| LOC100071251  | -0142 | -136 | + | 6.58 | GCCATC |
| LOC100071227  | -0198 | -192 | + | 6.58 | GCCATC |
| LOC100071227  | -0141 | -135 | + | 6.58 | GCCATC |
| OR1Q1         | -0171 | -165 | + | 6.58 | GCCATC |
| LOC100071311  | -0153 | -147 | + | 6.58 | GCCATC |
| LOC100071407  | -0187 | -181 | + | 6.58 | GCCATC |
| LOC100071420  | -0144 | -138 | + | 6.42 | ACCATC |
| LOC100071448  | -0144 | -138 | + | 6.42 | ACCATC |

5 MA0070.1 PBX1 14.6408950838 0.310185187496 -53:-17 6.40650017578e-08

## list of hits

|               |       |     |   |      |                |
|---------------|-------|-----|---|------|----------------|
| MIR135A-2     | -0043 | -31 | - | 4.39 | GTTGATTCATCT   |
| PDE3A         | -0017 | -5  | + | 4.89 | ATATGAATCATA   |
| MGP           | -0021 | -9  | + | 4.30 | CCATCAATTTAA   |
| LOC100052689  | -0025 | -13 | + | 5.95 | TGATCCATCCAT   |
| LOC100052526  | -0050 | -38 | - | 4.18 | TTTGGTTGTTGT   |
| LOC100052229  | -0023 | -11 | + | 6.13 | CCATCCATCCAC   |
| MIR3613       | -0050 | -38 | + | 6.29 | AGCACAAATCAAA  |
| MIR3613       | -0018 | -6  | + | 3.68 | CCCACAATCTTT   |
| MIR16-2       | -0041 | -29 | - | 5.95 | ATTGAATGAGAT   |
| MIR15A        | -0031 | -19 | - | 5.76 | TTTTATTGATAA   |
| THRAP3        | -0025 | -13 | + | 3.27 | CAACCACTCAAA   |
| STRBP         | -0051 | -39 | - | 3.89 | ATTGTTTGTGTTGT |
| GPR21         | -0029 | -17 | + | 5.76 | AGATGAATCAAA   |
| _LOC100071297 | -0036 | -24 | - | 5.49 | TATGCTGGATGC   |
| LOC100071311  | -0018 | -6  | - | 3.66 | TATGCTGGGTGT   |

|              |       |     |   |      |              |
|--------------|-------|-----|---|------|--------------|
| LOC100071329 | -0053 | -41 | + | 3.44 | TAAACATGCAAA |
| LOC100071329 | -0037 | -25 | + | 7.84 | GGATCAATCCAT |
| LOC100071329 | -0021 | -9  | - | 3.66 | TATGCTGGGTGT |
| LOC100071346 | -0025 | -13 | + | 4.86 | AAGTCCATCAAG |
| LOC100071365 | -0037 | -25 | + | 5.11 | GAGTCAATCCAT |
| LOC100071402 | -0033 | -21 | + | 4.23 | CAGTCAATCCTC |
| LOC100071469 | -0021 | -9  | + | 4.65 | TCACCAATCTGT |
| MYCT1        | -0047 | -35 | - | 3.44 | ACTGCATGATTT |

6 MA0063.1 Nkx2-5 8.26972553332 0.218487398433 -2735:-2636  
2.37774186268e-07

## list of hits

|               |       |       |       |      |              |
|---------------|-------|-------|-------|------|--------------|
| CEP83         | -2715 | -2708 | +     | 6.35 | TTAATAG      |
| CEP83         | -2637 | -2630 | -     | 7.00 | CACTTAA      |
| TMCC3         | -2717 | -2710 | -     | 6.18 | CAATTGA      |
| MIR135A-2     |       | -2685 | -2678 | -    | 6.06 AAATTAA |
| SLCO1C1       | -2733 | -2726 | -     | 7.35 | CAATTAA      |
| .EU2          | -2657 | -2650 | +     | 6.18 | TCAATTG      |
| SOX5          | -2658 | -2651 | -     | 7.00 | CACTTAA      |
| SOX5          | -2636 | -2629 | -     | 6.75 | CACTTAT      |
| WBP11         | -2723 | -2716 | +     | 6.10 | ATAATAG      |
| ART4          | -2670 | -2663 | -     | 6.75 | CACTTAT      |
| H2AJ          | -2638 | -2631 | -     | 7.00 | CACTTAA      |
| ATF7IP        | -2721 | -2714 | -     | 7.00 | CACTTAA      |
| GRI.2B        | -2641 | -2634 | -     | 5.99 | CTCTTAA      |
| PGM5          | -2735 | -2728 | -     | 6.75 | CACTTAT      |
| TMEM252       | -2717 | -2710 | +     | 6.35 | TTAATAG      |
| FAM122A       | -2733 | -2726 | +     | 7.00 | TTAAGTG      |
| APBA1         | -2723 | -2716 | -     | 7.00 | CACTTAA      |
| APBA1         | -2642 | -2635 | -     | 6.10 | CTATTAT      |
| C23H9orf135   |       | -2673 | -2666 | -    | 7.00 CACTTAA |
| C23H9orf135   |       | -2643 | -2636 | -    | 6.35 CTATTAA |
| MAMDC2        | -2706 | -2699 | -     | 6.06 | AAATTAA      |
| SMC2          | -2641 | -2634 | -     | 6.06 | AAATTAA      |
| _KA.K1        | -2697 | -2690 | -     | 6.06 | AAATTAA      |
| DOCK8         | -2667 | -2660 | -     | 7.00 | CACTTAA      |
| LOC100052901  |       | -2683 | -2676 | +    | 6.06 TTAATTT |
| CKAP2         | -2706 | -2699 | +     | 6.06 | TTAATTT      |
| WDFY2         | -2694 | -2687 | -     | 7.00 | CACTTAA      |
| SERPI.E3      |       | -2656 | -2649 | -    | 6.06 AAATTAA |
| DLEU7         | -2704 | -2697 | +     | 5.99 | TTAAGAG      |
| DLEU7         | -2643 | -2636 | +     | 5.93 | ACAATTG      |
| C1H15orf41    |       | -2673 | -2666 | +    | 5.93 ACAATTG |
| TE.M4         | -2657 | -2650 | -     | 6.06 | AAATTAA      |
| C2H1orf216    |       | -2695 | -2688 | +    | 7.10 ATAATTG |
| PSMB2         | -2704 | -2697 | -     | 6.06 | AAATTAA      |
| STRBP         | -2646 | -2639 | -     | 6.06 | AAATTAA      |
| ZBTB6         | -2700 | -2693 | -     | 6.18 | CAATTGA      |
| ZBTB26        | -2648 | -2641 | -     | 6.06 | AAATTAA      |
| LOC100071212  |       | -2686 | -2679 | +    | 5.93 ACAATTG |
| LOC100067520  |       | -2715 | -2708 | -    | 7.00 CACTTAA |
| LOC100071251  |       | -2695 | -2688 | +    | 7.35 TTAATTG |
| OR1B1         | -2658 | -2651 | -     | 7.35 | CAATTAA      |
| LOC100071270  |       | -2683 | -2676 | -    | 6.06 AAATTAA |
| LOC100071270  |       | -2653 | -2646 | +    | 6.35 TTAATAG |
| _LOC100071297 |       | -2642 | -2635 | -    | 5.99 CTCTTAA |
| LOC100071346  |       | -2665 | -2658 | -    | 6.06 AAATTAA |
| LOC100071358  |       | -2727 | -2720 | +    | 6.06 TTAATTT |
| LOC100071358  |       | -2682 | -2675 | -    | 5.99 CTCTTAA |
| LOC100071407  |       | -2731 | -2724 | -    | 6.35 CTATTAA |
| LOC100071486  |       | -2679 | -2672 | -    | 5.93 CAATTGT |

7 MA0047.2 Foxa2 13.2676175109 0.315129053384 -1814:-1777  
4.73018047045e-07

## list of hits

|           |       |       |       |      |                   |
|-----------|-------|-------|-------|------|-------------------|
| CEP83     | -1810 | -1798 | +     | 5.11 | TCTTTACATTTA      |
| CEP83     | -1780 | -1768 | +     | 4.98 | TATTTATTTGAG      |
| MIR135A-2 |       | -1793 | -1781 | -    | 5.47 GGTGAGCCAACA |
| SOX5      | -1800 | -1788 | -     | 7.75 | GAAGAATAAACA      |

|               |       |       |       |       |                    |
|---------------|-------|-------|-------|-------|--------------------|
| GRI.2B        | -1791 | -1779 | -     | 5.43  | GAAAAGAAAACA       |
| GSG1          | -1810 | -1798 | +     | 4.99  | TAATTACACAGG       |
| _PTAR1        | -1791 | -1779 | -     | 5.74  | GTTAAGTAAAAA       |
| C23H9orf135   |       | -1795 | -1783 | -     | 8.18 GTAAAAATAAACA |
| C23H9orf135   |       | -1783 | -1771 | -     | 5.92 CATGAACAAACA  |
| _KA.K1        | -1811 | -1799 | -     | 6.44  | TTTGTGTACACA       |
| DOCK8         | -1779 | -1767 | -     | 7.04  | CCTTAGTACACA       |
| .EK5          | -1814 | -1802 | -     | 4.99  | AGGGTGTAAACA       |
| CCDC70        | -1792 | -1780 | -     | 6.12  | TTTGTGCAAATA       |
| EBPL          | -1809 | -1797 | -     | 6.91  | TAACGTGTAAATA      |
| ClH15orf41    |       | -1791 | -1779 | +     | 4.92 TGTTGAAACTGG  |
| DPH6          | -1810 | -1798 | -     | 5.77  | ATTTGGTAAATA       |
| AGO4          | -1787 | -1775 | -     | 5.67  | CATTTGTACACA       |
| .CD.          | -1796 | -1784 | +     | 10.47 | TGTTTACTTAAT       |
| GPR21         | -1812 | -1800 | -     | 4.98  | GATCTATCAACA       |
| ZBTB6         | -1795 | -1783 | +     | 7.40  | TATTTATTTATT       |
| RC3H2         | -1798 | -1786 | +     | 10.75 | TGTTTACATAAG       |
| OR1K1         | -1812 | -1800 | +     | 5.92  | TATTTGCAGAGA       |
| LOC100071212  |       | -1795 | -1783 | -     | 5.63 AATATGTAAAGA  |
| LOC100071258  |       | -1801 | -1789 | -     | 5.59 TCAATACAAATA  |
| LOC100071258  |       | -1786 | -1774 | -     | 7.40 AATAAAATAAATA |
| _LOC100071297 |       | -1793 | -1781 | +     | 5.54 TATTGACTTGTC  |
| _LOC100071297 |       | -1777 | -1765 | +     | 5.01 TATTGGCTGTGT  |
| LOC100071346  |       | -1813 | -1801 | +     | 5.93 TGTTTGTTTAAT  |
| LOC100071420  |       | -1806 | -1794 | +     | 9.36 TATTTACATAAT  |
| LOC100071420  |       | -1790 | -1778 | -     | 5.42 CTAACGTAAATA  |
| LOC100071420  |       | -1777 | -1765 | +     | 8.90 TGTTTACTGAAG  |
| LOC100071445  |       | -1791 | -1779 | +     | 8.32 TATTGACTTATC  |
| MTRF1L        | -1785 | -1773 | +     | 5.68  | TGTTTTCATTTG       |

8 MA0027.1 En1 6.42106531013 0.445454545184 -1667:-1565  
1.03926279007e-06

## list of hits

|               |       |       |       |      |                   |
|---------------|-------|-------|-------|------|-------------------|
| PLX.C1        | -1570 | -1559 | +     | 6.35 | TGGTGGTGCTC       |
| .R2C1         | -1606 | -1595 | -     | 5.61 | AACCATAACTT       |
| PDE3A         | -1566 | -1555 | +     | 6.42 | AAGTTATTGCC       |
| SLC01A2       | -1653 | -1642 | -     | 5.66 | GAAAACAACCC       |
| IAPP          | -1577 | -1566 | +     | 6.64 | ACGTGGTGGTC       |
| SLC01B3       | -1613 | -1602 | -     | 6.30 | GGACTCTACTC       |
| SLC01C1       | -1643 | -1632 | -     | 5.89 | GCCAACCACTT       |
| USP40         | -1667 | -1656 | +     | 6.64 | AGGTGGTGTCC       |
| I.PP5D        | -1605 | -1594 | -     | 5.86 | GAAC TTCACTT      |
| .EU2          | -1637 | -1626 | +     | 5.61 | AAGTTATGTTT       |
| .GEF          | -1571 | -1560 | +     | 5.61 | AAAGAGTGCCC       |
| KC.J13        | -1653 | -1642 | -     | 6.45 | GAACACTCCTT       |
| MGP           | -1643 | -1632 | +     | 5.73 | GAGTTATTTCC       |
| PGM5          | -1646 | -1635 | +     | 5.89 | CAGTGGTTTCC       |
| FAM189A2      |       | -1616 | -1605 | +    | 5.90 AAGTAATGACC  |
| C23H9orf135   |       | -1627 | -1616 | +    | 7.83 AAGTAGTGGTC  |
| LOC100052526  |       | -1589 | -1578 | +    | 5.79 ACATGGTGCTC  |
| VPS36         | -1580 | -1569 | +     | 6.17 | TAGTAGTTCCT       |
| CKAP2         | -1628 | -1617 | -     | 5.61 | GACCATTCCTT       |
| MIR3613       | -1664 | -1653 | +     | 5.86 | AAATAATTGCC       |
| MIR3613       | -1632 | -1621 | -     | 5.86 | GGAATCTATTT       |
| AGO4          | -1660 | -1649 | -     | 5.61 | AAAAATTACTT       |
| AGO4          | -1588 | -1577 | +     | 6.01 | GAATTGTGTCC       |
| _CSF3R        | -1617 | -1606 | -     | 5.88 | AGGAACAAC TA      |
| STK40         | -1635 | -1624 | -     | 5.61 | AGGCATCACTT       |
| C2H1orf216    |       | -1667 | -1656 | +    | 6.17 AAGTGGTTTTT  |
| PDCL          | -1602 | -1591 | +     | 6.30 | AAGTAGAATCC       |
| LOC100071244  |       | -1656 | -1645 | +    | 5.77 AAGTTGTGGCA  |
| LOC100071244  |       | -1614 | -1603 | -    | 5.77 GAGTACTCCTT  |
| LOC100071258  |       | -1622 | -1611 | -    | 6.35 GGCAACTACCA  |
| OR1B1         | -1659 | -1648 | -     | 6.86 | GAGCACCACCTC      |
| _LOC100071297 |       | -1565 | -1554 | -    | 5.73 GAGAATAACTC  |
| LOC100071329  |       | -1624 | -1613 | +    | 6.18 TAGTAGTGGGC  |
| LOC100071358  |       | -1628 | -1617 | -    | 5.79 GAAACTATCT   |
| LOC100071438  |       | -1619 | -1608 | -    | 6.17 AGCAACAACCTT |
| LOC100071445  |       | -1566 | -1555 | -    | 5.73 GAGAATAACTC  |

|              |       |       |   |      |              |
|--------------|-------|-------|---|------|--------------|
| LOC100071460 | -1568 | -1557 | - | 6.42 | GAAAAATCACTT |
| MTRF1L       | -1588 | -1577 | + | 5.86 | AAATAATTTCC  |
| VIP          | -1657 | -1646 | - | 6.42 | GAGAACCATTT  |

9 MA0089.1 NFE2L1::MafG 7.93814372721 0.421568617371 -2886:-2737  
1.55300729324e-06

list of hits

|               |       |       |   |      |        |
|---------------|-------|-------|---|------|--------|
| TMCC3         | -2886 | -2880 | - | 6.66 | GTCATG |
| TMCC3         | -2756 | -2750 | + | 6.66 | CATGAC |
| TMCC3         | -2747 | -2741 | - | 6.66 | GTCATG |
| FGD6          | -2826 | -2820 | + | 6.66 | CATGAC |
| LOC100065342  | -2806 | -2800 | + | 6.57 | GATGAC |
| CHR.D         | -2753 | -2747 | + | 6.57 | GATGAC |
| PRSS56        | -2781 | -2775 | + | 6.66 | CATGAC |
| EIF4E2        | -2885 | -2879 | + | 6.57 | GATGAC |
| ARHGDIB       | -2860 | -2854 | + | 6.66 | CATGAC |
| MGP           | -2853 | -2847 | + | 6.66 | CATGAC |
| GRI.2B        | -2839 | -2833 | + | 6.66 | CATGAC |
| DMRT3         | -2738 | -2732 | - | 6.57 | GTCATC |
| SMC2          | -2802 | -2796 | + | 6.66 | CATGAC |
| DOCK8         | -2884 | -2878 | + | 6.57 | GATGAC |
| LOC100052689  | -2747 | -2741 | - | 6.66 | GTCATG |
| LOC100052292  | -2787 | -2781 | + | 6.57 | GATGAC |
| LOC100147522  | -2783 | -2777 | - | 6.57 | GTCATC |
| .EK3          | -2838 | -2832 | + | 6.66 | CATGAC |
| .EK5          | -2822 | -2816 | + | 6.66 | CATGAC |
| _I.TS6        | -2846 | -2840 | + | 6.66 | CATGAC |
| EBPL          | -2775 | -2769 | + | 6.57 | GATGAC |
| STK40         | -2876 | -2870 | - | 6.57 | GTCATC |
| STK40         | -2787 | -2781 | + | 6.57 | GATGAC |
| AGO3          | -2875 | -2869 | - | 6.57 | GTCATC |
| AGO3          | -2791 | -2785 | - | 6.66 | GTCATG |
| AGO3          | -2769 | -2763 | - | 6.66 | GTCATG |
| MAP7D1        | -2880 | -2874 | - | 6.66 | GTCATG |
| CLSP.         | -2737 | -2731 | + | 6.57 | GATGAC |
| C2H1orf216    | -2778 | -2772 | + | 6.57 | GATGAC |
| C2H1orf216    | -2767 | -2761 | + | 6.57 | GATGAC |
| .CD.          | -2849 | -2843 | + | 6.57 | GATGAC |
| RABGAP1       | -2842 | -2836 | + | 6.66 | CATGAC |
| RC3H2         | -2757 | -2751 | + | 6.66 | CATGAC |
| LOC100071189  | -2851 | -2845 | - | 6.66 | GTCATG |
| LOC100071189  | -2801 | -2795 | - | 6.57 | GTCATC |
| LOC100071212  | -2860 | -2854 | + | 6.57 | GATGAC |
| _LOC100071297 | -2878 | -2872 | + | 6.57 | GATGAC |
| LOC100071332  | -2821 | -2815 | - | 6.66 | GTCATG |
| LOC100071402  | -2800 | -2794 | - | 6.57 | GTCATC |
| LOC100071420  | -2774 | -2768 | - | 6.66 | GTCATG |
| LOC100071445  | -2882 | -2876 | + | 6.57 | GATGAC |
| MTRF1L        | -2743 | -2737 | + | 6.66 | CATGAC |

10 MA0152.1 NFATC2 9.85861508532 0.346153842592 -2799:-2758  
2.85459229986e-06

list of hits

|              |       |       |   |      |         |
|--------------|-------|-------|---|------|---------|
| PLX.C1       | -2791 | -2784 | - | 7.20 | AGGAAAA |
| USP40        | -2797 | -2790 | - | 8.69 | TGGAAAA |
| ATG16L1      | -2766 | -2759 | + | 8.69 | TTTTCCA |
| PLBD1        | -2772 | -2765 | - | 8.69 | TGGAAAA |
| PLBD1        | -2758 | -2751 | + | 6.81 | ATTTCCA |
| CBWD1        | -2792 | -2785 | - | 7.20 | AGGAAAA |
| FOX4         | -2786 | -2779 | + | 6.92 | TTTTCCC |
| PGM5         | -2784 | -2777 | + | 6.42 | GTTTCCA |
| C23H9orf135  | -2798 | -2791 | - | 7.20 | AGGAAAA |
| C23H9orf135  | -2764 | -2757 | + | 7.20 | TTTTCCT |
| LOC100052526 | -2799 | -2792 | + | 6.81 | ATTTCCA |
| LOC100052526 | -2790 | -2783 | + | 8.69 | TTTTCCA |
| LOC100052526 | -2777 | -2770 | + | 6.81 | ATTTCCA |
| .EK5         | -2762 | -2755 | + | 6.37 | TCTTCCA |
| ATP7B        | -2758 | -2751 | - | 6.92 | GGGAAAA |
| _I.TS6       | -2790 | -2783 | - | 6.42 | TGGAAAC |

|               |       |       |       |      |               |
|---------------|-------|-------|-------|------|---------------|
| TRIM13        | -2799 | -2792 | +     | 6.37 | TGTTCCA       |
| DLEU7         | -2776 | -2769 | +     | 6.92 | TTTTCCC       |
| ClH15orf41    |       | -2783 | -2776 | +    | 6.92 TTTTCCC  |
| OSCP1         | -2799 | -2792 | -     | 6.92 | GGGAAAA       |
| AGO1          | -2758 | -2751 | +     | 6.37 | TGTTCCA       |
| PSMB2         | -2798 | -2791 | -     | 6.92 | GGGAAAA       |
| RABGAP1       | -2789 | -2782 | -     | 6.37 | TGGAAGA       |
| LOC100071251  |       | -2791 | -2784 | +    | 6.37 TCTTCCA  |
| OR1Q1         | -2774 | -2767 | +     | 7.20 | TTTTCCCT      |
| LOC100071270  |       | -2770 | -2763 | -    | 6.42 TGGA AAC |
| _LOC100071297 |       | -2791 | -2784 | -    | 6.92 GGGAAAA  |
| _LOC100071297 |       | -2759 | -2752 | -    | 8.69 TGGA AAA |
| LOC100071346  |       | -2778 | -2771 | -    | 6.92 GGGAAAA  |
| LOC100071365  |       | -2760 | -2753 | +    | 6.92 TTTTCCC  |
| LOC100071420  |       | -2781 | -2774 | -    | 7.20 AGGAAAA  |
| LOC100071445  |       | -2794 | -2787 | -    | 7.20 AGGAAAA  |
| FBXO5         | -2796 | -2789 | +     | 7.20 | TTTTCCCT      |
| FBXO5         | -2761 | -2754 | -     | 8.69 | TGGA AAA      |
| MYCT1         | -2777 | -2770 | -     | 6.37 | TGGAAGA       |

11 MA0148.1 FOXA1 12.5328023695 0.332119902252 -2939:-2901  
3.26060686909e-06

list of hits

|               |       |       |       |       |                  |
|---------------|-------|-------|-------|-------|------------------|
| PLX.C1        | -2937 | -2926 | -     | 9.06  | AAGGGTAAACA      |
| CEP83         | -2936 | -2925 | +     | 5.44  | TGTTTGTAATT      |
| TMCC3         | -2923 | -2912 | -     | 5.73  | ATGAATCAACA      |
| PDE3A         | -2923 | -2912 | +     | 6.55  | TGTTTCCTCTC      |
| LOC100065342  |       | -2930 | -2919 | -     | 6.22 AATAATAAACA |
| GUCY2C        | -2907 | -2896 | +     | 5.23  | TGTTTGCAGGT      |
| PDE6H         | -2917 | -2906 | +     | 6.21  | TATTTTCTCTT      |
| H2AJ          | -2926 | -2915 | +     | 6.44  | TGGTTACTTAG      |
| GRI.2B        | -2902 | -2891 | +     | 7.53  | TATTTACTGAG      |
| EMP1          | -2933 | -2922 | -     | 10.18 | GAAAGTAAACA      |
| PROK2         | -2939 | -2928 | +     | 5.31  | TGTCTACCCTG      |
| _KA.K1        | -2903 | -2892 | +     | 5.80  | TATTTACAAAT      |
| _LOC100049805 |       | -2929 | -2918 | -     | 6.62 AAAGACAAACA |
| .EK3          | -2938 | -2927 | +     | 6.28  | TGTTAGCTCAG      |
| ATP7B         | -2901 | -2890 | +     | 5.41  | TGTTTACCTCT      |
| MIR16-2       | -2911 | -2900 | -     | 6.52  | ATGGATAAACA      |
| _RCBTB1       | -2918 | -2907 | +     | 7.90  | TGTTTGTTTAT      |
| R.ASEH2B      |       | -2913 | -2902 | +     | 5.35 TTTTTCATAT  |
| LSM10         | -2907 | -2896 | -     | 11.37 | CAGAGTAAACA      |
| THRAP3        | -2906 | -2895 | +     | 6.52  | TGTTTGATCTG      |
| CLSP.         | -2937 | -2926 | +     | 5.85  | TGTTTCTAAT       |
| CLSP.         | -2920 | -2909 | -     | 5.91  | TAAGGAAAACA      |
| C2Hlorf216    |       | -2928 | -2917 | -     | 5.45 CTAAATACACA |
| .CD.          | -2911 | -2900 | +     | 8.77  | TATTTACATAG      |
| ZMYM4         | -2914 | -2903 | -     | 5.21  | ACAAGCCAACA      |
| STRBP         | -2915 | -2904 | -     | 5.60  | GAAAGCAAAAA      |
| ZBTB26        | -2930 | -2919 | -     | 6.39  | AAAAGCAAACCT     |
| PDCL          | -2932 | -2921 | -     | 6.28  | ATGAGTAAACT      |
| PDCL          | -2921 | -2910 | +     | 9.67  | TGTTTGATAT       |
| OR1B1         | -2905 | -2894 | +     | 7.40  | TGTTGACCTAG      |
| _LOC100071297 |       | -2904 | -2893 | +     | 5.44 TGTTTGTAATT |
| LOC100071338  |       | -2939 | -2928 | +     | 9.91 TGTTTGATTT  |
| OR1.1         | -2913 | -2902 | -     | 6.12  | GTAATAAACA       |
| LOC100071445  |       | -2908 | -2897 | +     | 5.44 TGTTTGTAATT |
| MYCT1         | -2925 | -2914 | +     | 5.46  | TGTTTATTAAC      |
| RGS17         | -2921 | -2910 | -     | 7.07  | AAGAGGAAACA      |

12 MA0006.1 Arnt::Ahr 9.53241699429 0.715277771155 -455:-418  
4.636342681e-06

list of hits

|         |       |      |   |      |        |
|---------|-------|------|---|------|--------|
| GIGYF2  | -0455 | -449 | - | 7.05 | CACGCG |
| ARHGDIB | -0429 | -423 | - | 7.05 | CACGCG |
| RYBP    | -0448 | -442 | + | 7.05 | CGCGTG |
| PROK2   | -0453 | -447 | + | 7.05 | CGCGTG |
| FOXP1   | -0450 | -444 | + | 7.37 | TGCGTG |
| FAM122A | -0453 | -447 | - | 7.05 | CACGCG |

|         |       |      |   |      |        |
|---------|-------|------|---|------|--------|
| APBA1   | -0418 | -412 | - | 7.05 | CACGCG |
| DOCK8   | -0436 | -430 | - | 7.05 | CACGCG |
| ALG11   | -0423 | -417 | - | 7.05 | CACGCG |
| _I.TS6  | -0452 | -446 | + | 7.05 | CGCGTG |
| FAM124A | -0419 | -413 | - | 7.37 | CACGCA |
| TE.M4   | -0418 | -412 | + | 7.37 | TGCGTG |
| AGO4    | -0426 | -420 | - | 7.37 | CACGCA |
| MRPS15  | -0435 | -429 | - | 7.37 | CACGCA |
| TFAP2E  | -0445 | -439 | + | 7.37 | TGCGTG |
| STRBP   | -0431 | -425 | + | 7.05 | CGCGTG |
| RGS17   | -0418 | -412 | - | 7.05 | CACGCG |

13 MA0031.1 FOXD1 11.9264176032 0.27500000177 -2939:-2902  
4.91922843776e-06

## list of hits

|              |       |       |   |      |           |
|--------------|-------|-------|---|------|-----------|
| PLX.C1       | -2933 | -2925 | + | 9.69 | GTAAACAT  |
| FGD6         | -2924 | -2916 | - | 5.88 | CTGGTTAC  |
| SLCO1A2      | -2924 | -2916 | + | 5.94 | CTAAACAG  |
| LOC100065342 | -2926 | -2918 | + | 6.77 | ATAAACAA  |
| I.PP5D       | -2921 | -2913 | + | 6.77 | ATAAACAA  |
| CHR.G        | -2922 | -2914 | + | 6.77 | TTAAACAA  |
| GRI.2B       | -2922 | -2914 | + | 6.72 | GTAAAAAA  |
| GRI.2B       | -2903 | -2895 | - | 6.85 | ATATTTAC  |
| EMP1         | -2929 | -2921 | + | 9.56 | GTAAACAA  |
| _KA.K1       | -2904 | -2896 | - | 6.85 | ATATTTAC  |
| CKAP2        | -2909 | -2901 | + | 6.91 | TTAAACAT  |
| ATP7B        | -2902 | -2894 | - | 9.69 | ATGTTTAC  |
| WDFY2        | -2934 | -2926 | + | 6.77 | TTAAACAA  |
| SERPI.E3     | -2939 | -2931 | + | 6.91 | ATAAACAT  |
| MIR16-2      | -2907 | -2899 | + | 6.77 | ATAAACAA  |
| _RCBTB1      | -2915 | -2907 | - | 6.77 | TTGTTTAT  |
| DPH6         | -2935 | -2927 | + | 5.88 | GTAACCAG  |
| LSM10        | -2903 | -2895 | + | 9.56 | GTAAACAA  |
| .CD.         | -2912 | -2904 | - | 6.85 | ATATTTAC  |
| GPR21        | -2937 | -2929 | - | 6.72 | TTTTTTTAC |
| OR1B1        | -2906 | -2898 | - | 6.80 | ATGTTGAC  |
| LOC100071346 | -2924 | -2916 | - | 5.94 | CTGTTTAT  |
| OR1.1        | -2909 | -2901 | + | 6.91 | ATAAACAT  |
| MYCT1        | -2926 | -2918 | - | 6.91 | ATGTTTAT  |

14 MA0083.1 SRF 17.9647717767 0.465579714133 -2988:-2923  
7.1966303339e-06

## list of hits

|              |       |       |   |       |              |
|--------------|-------|-------|---|-------|--------------|
| EFHD1        | -2976 | -2964 | + | 4.10  | TCCCAAAGATGG |
| GUCY2C       | -2948 | -2936 | - | 2.99  | TTATATGTGGGA |
| DMRT3        | -2946 | -2934 | + | 3.25  | GTCCCTATAGGG |
| PGM5         | -2955 | -2943 | - | 2.67  | GCAACTATGGGC |
| FAM189A2     | -2927 | -2915 | + | 3.67  | TGCCACATTTGG |
| APBA1        | -2944 | -2932 | - | 3.12  | GCAAATTTGGGT |
| LOC100052526 | -2964 | -2952 | + | 5.25  | TCCAATATAAAG |
| LOC100052292 | -2988 | -2976 | - | 4.40  | CTTTATCAGGGC |
| LOC100052292 | -2969 | -2957 | + | 4.44  | GACCACATAGGG |
| OSCP1        | -2956 | -2944 | - | 10.33 | TCTTATAAGGGC |
| TRAPPC3      | -2927 | -2915 | + | 3.41  | TCCCAAAGAAGG |
| MAP7D1       | -2926 | -2914 | - | 3.41  | CCTTCTTTGGGA |
| ADPRHL2      | -2951 | -2939 | - | 3.41  | CCTTATTTGTGA |
| STRBP        | -2958 | -2946 | + | 5.92  | GCCCCATTTTGA |
| GPR21        | -2962 | -2950 | + | 3.05  | TCCAATATCTGG |
| ZBTB6        | -2927 | -2915 | + | 3.64  | ATCCAAATATGA |
| RC3H2        | -2973 | -2961 | + | 4.26  | TGCCATATTTAG |
| LOC100071258 | -2939 | -2927 | + | 3.19  | GACCATAAAAAA |
| OR1B1        | -2923 | -2911 | + | 2.49  | AACATCATATGG |
| LOC100071438 | -2982 | -2970 | - | 3.28  | CCTTCTATGCTC |
| LOC100071448 | -2983 | -2971 | - | 4.59  | GCTAATAGGGGC |

15 MA0140.1 Tal1::Gata1 11.2966184617 0.45067769915 -3108:-3030  
7.57917797919e-06

## list of hits

|      |       |       |   |      |                    |
|------|-------|-------|---|------|--------------------|
| FGD6 | -3033 | -3015 | - | 6.10 | TTTATCATAAGTCTGAAT |
|------|-------|-------|---|------|--------------------|



|               |       |       |       |      |                         |
|---------------|-------|-------|-------|------|-------------------------|
| PRSS56        | -3108 | -3090 | +     | 6.75 | GGTTCGAACTCAGATAAA      |
| GUCY2C        | -3054 | -3036 | +     | 6.04 | TTTTATGAGGAAGATTAG      |
| PDE6H         | -3093 | -3075 | +     | 6.35 | CGTGACACCATAGATAGG      |
| C6H12orf60    |       | -3095 | -3077 | -    | 6.80 CTTATCTGCAAAGTTCTT |
| MGP           | -3046 | -3028 | -     | 5.98 | ATTATCTAAAACCCAAAT      |
| H2AJ          | -3094 | -3076 | +     | 9.00 | GTGGCCCCCACAGATAAT      |
| EMP1          | -3069 | -3051 | -     | 5.62 | TTTATCTTTCAAAAATAT      |
| PIP5K1B       | -3030 | -3012 | -     | 6.22 | CGTATCACCTCCCTTCAG      |
| FX.           | -3104 | -3086 | +     | 7.06 | GTGAAGTGGGGTGATAGG      |
| FX.           | -3044 | -3026 | -     | 5.78 | ATTATCTGGAGGTAGACA      |
| LOC100052901  |       | -3047 | -3029 | +    | 6.96 CCGTGTTATTTAGATAAC |
| LOC100052951  |       | -3108 | -3090 | +    | 7.14 CTAGCAACAAAAGATAAA |
| LOC100052951  |       | -3055 | -3037 | +    | 6.66 CTGTGTACTAAAGATAGT |
| LOC100052689  |       | -3071 | -3053 | +    | 6.27 CAACAGCCAAAAGATAAG |
| LOC100052582  |       | -3035 | -3017 | -    | 8.52 TCTATCTCCTGCCACCAA |
| LOC100052526  |       | -3077 | -3059 | -    | 6.14 CCTATCAGTAGTTGCATG |
| _LOC100049805 |       | -3060 | -3042 | +    | 5.87 TTGTGTACTAAAGATAGT |
| LOC100052292  |       | -3068 | -3050 | -    | 6.71 TCTATCTCCATGTCCCCA |
| _I.TS6        | -3100 | -3082 | -     | 6.31 | TTTATCTAGGGACCACTG      |
| KP.A3         | -3035 | -3017 | +     | 6.40 | TTGCTCCCCAGAGATTAA      |
| MIR15A        | -3059 | -3041 | -     | 6.76 | ATTATCAAAAAAAAAACAG     |
| _CSF3R        | -3060 | -3042 | +     | 6.58 | ACCCCTGTGGCAGATAAG      |
| THRAP3        | -3102 | -3084 | -     | 5.90 | CTAATCTTCCTCAAAAAT      |
| THRAP3        | -3031 | -3013 | +     | 5.68 | GGTAGAATTTTCAGATAAA     |
| CLSP.         | -3090 | -3072 | +     | 5.94 | GTGTGATATAATGATAGA      |
| _LOC100071297 |       | -3053 | -3035 | -    | 8.00 CTTATCTGAAAAATAGAG |
| LOC100071338  |       | -3056 | -3038 | -    | 5.84 TTTATCTTTATTCTAATA |
| LOC100071407  |       | -3093 | -3075 | +    | 8.20 AGTGAAACTGCAGATAAG |
| LOC100071445  |       | -3060 | -3042 | -    | 8.00 CTTATCTGAAAAATAGAG |
| LOC100071469  |       | -3032 | -3014 | -    | 6.35 CTAATCTTTCTCAAAAAA |

16 MA0081.1 SPIB 9.06007130057 0.466472323191 -2920:-2872  
8.68057919725e-06

list of hits

|               |       |       |       |      |              |
|---------------|-------|-------|-------|------|--------------|
| .DUFA12       | -2913 | -2906 | -     | 7.28 | TTCCCTCA     |
| PDE3A         | -2920 | -2913 | -     | 7.82 | TTCCCTCT     |
| SLC01B3       | -2912 | -2905 | -     | 7.82 | TTCCCTCT     |
| .EU2          | -2880 | -2873 | +     | 7.82 | AGAGGAA      |
| EFHD1         | -2881 | -2874 | -     | 7.82 | TTCCCTCT     |
| CHR.D         | -2879 | -2872 | +     | 7.09 | ACAGGAA      |
| CHR.G         | -2907 | -2900 | -     | 7.82 | TTCCCTCT     |
| C6H12orf60    |       | -2872 | -2865 | -    | 6.55 TTCCTGA |
| ART4          | -2901 | -2894 | -     | 7.82 | TTCCCTCT     |
| PLBD1         | -2905 | -2898 | +     | 6.60 | AGGGGAA      |
| PROK2         | -2880 | -2873 | -     | 7.09 | TTCCCTGT     |
| DMRT2         | -2910 | -2903 | -     | 6.55 | TTCCCTGA     |
| FOXO4         | -2912 | -2905 | -     | 6.60 | TTCCCCCT     |
| PIP5K1B       | -2904 | -2897 | +     | 6.55 | TCAGGAA      |
| C23H9orf135   |       | -2903 | -2896 | +    | 7.28 TGAGGAA |
| C23H9orf135   |       | -2895 | -2888 | +    | 7.09 ACAGGAA |
| WDFY2         | -2894 | -2887 | +     | 7.28 | TGAGGAA      |
| TRIM13        | -2902 | -2895 | -     | 7.82 | TTCCCTCT     |
| SPRYD7        | -2898 | -2891 | -     | 7.28 | TTCCCTCA     |
| EBPL          | -2919 | -2912 | +     | 7.09 | ACAGGAA      |
| AGO1          | -2890 | -2883 | -     | 7.09 | TTCCCTGT     |
| STK40         | -2899 | -2892 | +     | 7.82 | AGAGGAA      |
| THRAP3        | -2872 | -2865 | -     | 7.82 | TTCCCTCT     |
| TRAPPC3       | -2875 | -2868 | -     | 6.60 | TTCCCCCT     |
| LOC100071189  |       | -2901 | -2894 | +    | 6.60 AGGGGAA |
| _LOC100071297 |       | -2872 | -2865 | +    | 7.82 AGAGGAA |
| LOC100071332  |       | -2916 | -2909 | -    | 6.55 TTCCTGA |
| LOC100071420  |       | -2898 | -2891 | +    | 6.60 AGGGGAA |
| LOC100071445  |       | -2876 | -2869 | +    | 7.82 AGAGGAA |
| RGS17         | -2920 | -2913 | +     | 7.82 | AGAGGAA      |

17 MA0070.1 PBX1 14.6408950838 0.310185187496 -511:-446  
1.12664644452e-05

list of hits

|           |  |       |      |   |                   |
|-----------|--|-------|------|---|-------------------|
| MIR135A-2 |  | -0461 | -449 | - | 4.80 GTTGAAGGATAA |
|-----------|--|-------|------|---|-------------------|

|               |       |      |   |      |               |
|---------------|-------|------|---|------|---------------|
| PDE3A         | -0484 | -472 | - | 7.32 | TTTGCTTGAGGA  |
| CHR.G         | -0493 | -481 | - | 6.35 | AAAGATGGATGG  |
| WBP11         | -0490 | -478 | + | 6.75 | GTGTCAATCAAC  |
| ARHGDIB       | -0472 | -460 | + | 4.45 | ATATCACTCAAG  |
| PDE6H         | -0466 | -454 | - | 6.19 | ATTGATTGTGTG  |
| ATF7IP        | -0484 | -472 | + | 7.32 | ACCTCATTCAAA  |
| DMRT2         | -0460 | -448 | - | 6.97 | AATGATTGAGTC  |
| FOXD4         | -0478 | -466 | - | 6.19 | CTGGATTGTTGG  |
| MAMDC2        | -0491 | -479 | - | 7.32 | TTTGCTTGAGGA  |
| THSD1         | -0460 | -448 | + | 5.95 | TCATCAAGCCAC  |
| VPS36         | -0488 | -476 | - | 4.30 | TTTAATTGGTGG  |
| TRIM13        | -0511 | -499 | + | 7.38 | ACAACAATCCAA  |
| EBPL          | -0500 | -488 | + | 3.99 | AAATCAAGCCTC  |
| LSM10         | -0450 | -438 | - | 6.17 | AAAGCTTGATGA  |
| SH3D21        | -0507 | -495 | - | 6.69 | CTTGAATGATTC  |
| CLSP.         | -0454 | -442 | + | 4.83 | CGCCAATCCAA   |
| PSMB2         | -0508 | -496 | + | 5.95 | TCCTCAAGCAAG  |
| _LOC100071170 | -0459 | -447 | - | 3.89 | ATGGTTTGATGA  |
| LOC100071227  | -0499 | -487 | + | 4.12 | ACAACAATGAAA  |
| LOC100071270  | -0491 | -479 | + | 7.67 | TCCTCAATCAGA  |
| _LOC100071297 | -0502 | -490 | + | 6.85 | TCATCAATAAAAA |
| LOC100071365  | -0491 | -479 | - | 5.05 | CTAGATGGATGC  |
| LOC100071358  | -0458 | -446 | + | 5.82 | ATATCTATCAAA  |
| LOC100071358  | -0446 | -434 | + | 4.06 | ACATGCATCAAA  |
| LOC100071486  | -0449 | -437 | - | 3.83 | ATTAATTGAGGA  |
| VIP           | -0500 | -488 | - | 4.46 | TATGCTTGGTAC  |

18 MA0077.1 SOX9 9.07881468797 0.358187139655 -2665:-2593  
1.19689911211e-05

list of hits

|               |       |       |   |      |           |
|---------------|-------|-------|---|------|-----------|
| .DUFA12       | -2593 | -2584 | + | 7.54 | ATACAATGG |
| FGD6          | -2630 | -2621 | + | 9.56 | GAACAATGG |
| PDE3A         | -2594 | -2585 | - | 6.46 | CTATTGGTC |
| I.PP5D        | -2644 | -2635 | - | 6.07 | CCATTATTC |
| .EU2          | -2659 | -2650 | + | 5.74 | TATCAATTG |
| GIGYF2        | -2665 | -2656 | - | 5.95 | GGATTGTTC |
| CHR.D         | -2595 | -2586 | - | 6.57 | CCATGGTTT |
| CHR.G         | -2626 | -2617 | - | 6.92 | CCATTGGTC |
| WBP11         | -2600 | -2591 | + | 6.98 | TAACAATGA |
| C6H12orf60    | -2599 | -2590 | + | 6.00 | AAACAATAT |
| EMP1          | -2665 | -2656 | - | 5.94 | CCTTTGTTA |
| FOXP1         | -2646 | -2637 | + | 5.98 | AAACAATTC |
| CBWD1         | -2634 | -2625 | + | 6.71 | GAACAATGT |
| FX.           | -2615 | -2606 | + | 6.28 | GAACAAAAG |
| _PTAR1        | -2598 | -2589 | + | 7.77 | AAACAATTG |
| ALG11         | -2593 | -2584 | + | 7.81 | AATCAATGG |
| MIR3613       | -2608 | -2599 | - | 6.25 | CAATTGTAC |
| DLEU7         | -2645 | -2636 | + | 7.77 | AAACAATTG |
| AGO1          | -2657 | -2648 | - | 5.83 | CCAATGTTT |
| THRAP3        | -2617 | -2608 | + | 5.83 | AAACACTGG |
| KIAA0319L     | -2605 | -2596 | - | 6.23 | TAATTGTTC |
| STRBP         | -2640 | -2631 | + | 7.52 | AAACAATGC |
| RABGAP1       | -2665 | -2656 | + | 6.02 | AATCAATGA |
| LOC100071212  | -2615 | -2606 | + | 6.65 | AAACTATAG |
| LOC100071264  | -2620 | -2611 | + | 7.06 | AAACAATAC |
| _LOC100071297 | -2638 | -2629 | + | 5.94 | TAACAAAGG |
| LOC100071329  | -2653 | -2644 | + | 6.30 | CAACAATGC |
| LOC100071329  | -2608 | -2599 | - | 5.75 | GCATTGTCC |
| LOC100071346  | -2657 | -2648 | + | 7.00 | TTACAATGG |
| LOC100071438  | -2648 | -2639 | - | 6.46 | ACATTGTTT |
| LOC100071420  | -2647 | -2638 | - | 6.02 | CTTTTGTTT |
| LOC100071445  | -2643 | -2634 | + | 5.94 | TAACAAAGG |
| LOC100071469  | -2634 | -2625 | - | 6.68 | CTATTGTGT |
| VIP           | -2640 | -2631 | - | 5.83 | CCAATGTTT |
| VIP           | -2624 | -2615 | - | 6.02 | CTTTTGTTT |

19 MA0108.2 TBP 10.0863285279 0.376692369239 -2342:-2300  
1.33914105896e-05

list of hits

|               |       |       |       |      |                       |
|---------------|-------|-------|-------|------|-----------------------|
| .R2C1         | -2342 | -2327 | -     | 6.61 | TCTGCCCTATTTATCC      |
| SLC01C1       | -2310 | -2295 | +     | 6.29 | GTTTAAAAATGCTTG       |
| SOX5          | -2340 | -2325 | +     | 6.62 | TTATAAAATTCAGGC       |
| GUCY2C        | -2338 | -2323 | -     | 7.69 | GGGGGCCCTTTTATCG      |
| H4-16         | -2314 | -2299 | -     | 6.87 | AGCAGTATTTTATAC       |
| GSG1          | -2308 | -2293 | -     | 6.58 | ATTGGCCTTTTATGT       |
| EIF4E3        | -2330 | -2315 | +     | 7.08 | ATATAAAAATGCTTA       |
| EIF4E3        | -2303 | -2288 | +     | 6.60 | TTATAAAAAGAAAATG      |
| FAM189A2      |       | -2342 | -2327 | +    | 6.08 GTATAAACTATCTA   |
| FAM189A2      |       | -2302 | -2287 | -    | 6.21 TCTGTTCTATATAC   |
| APBA1         | -2335 | -2320 | +     | 6.65 | CCATATAAAAAGAGCG      |
| _KA.K1        | -2319 | -2304 | +     | 9.51 | CTATAAAAAGGAATG       |
| LOC100052951  |       | -2317 | -2302 | -    | 7.70 TGATTCCCTTTTATAT |
| LOC100052689  |       | -2308 | -2293 | -    | 5.86 TTGGAGTATATATAT  |
| _LOC100049805 |       | -2324 | -2309 | -    | 7.70 TGATTCCCTTTTATAT |
| LOC100052229  |       | -2329 | -2314 | +    | 8.81 CTATAAAAAGAATGA  |
| FAM124A       | -2335 | -2320 | -     | 6.04 | AGGGGCCATTTGTAC       |
| ZMYM4         | -2323 | -2308 | +     | 7.61 | CTATAAATCCCTCTG       |
| LOC100071264  |       | -2341 | -2326 | +    | 7.58 CTATAAAATGAAGAC  |
| LOC100071346  |       | -2329 | -2314 | +    | 8.08 CTATATAAAACAGCA  |
| LOC100071346  |       | -2304 | -2289 | +    | 7.65 CCATAAAAAGAAGGA  |
| OR1.1         | -2318 | -2303 | +     | 8.56 | CTATAAAAGAAAGTG       |
| LOC100071420  |       | -2338 | -2323 | +    | 7.11 GTTTAAAAACACAGT  |
| RGS17         | -2300 | -2285 | -     | 6.21 | TGGTTGTATTTAAAG       |

20 MA0153.1 HNF1B 16.8212281893 0.22222222512 -1028:-962  
1.5201192336e-05

|               |       |       |       |      |                    |
|---------------|-------|-------|-------|------|--------------------|
| list of hits  |       |       |       |      |                    |
| PLX.C1        | -0971 | -959  | -     | 5.10 | AATAAATATTAG       |
| FGD6          | -1016 | -1004 | +     | 3.13 | TTAGTGAGTATC       |
| MIR331        | -1024 | -1012 | -     | 5.57 | GTTTAACATGAA       |
| PDE3A         | -1009 | -997  | -     | 3.73 | GTCAAATTTGAA       |
| MGP           | -1028 | -1016 | -     | 7.46 | GTTAATTATCAA       |
| FOXP1         | -0962 | -950  | +     | 4.23 | CTAGTTGTTAAC       |
| DMRT2         | -1012 | -1000 | +     | 6.04 | TTAAAGGTTAAC       |
| CBWD1         | -0997 | -985  | -     | 3.41 | GTTATCCATGGA       |
| LOC100052951  |       | -1007 | -995  | -    | 10.72 GTTAATTAGTAG |
| LOC100052689  |       | -0963 | -951  | -    | 7.97 GTCAATTAGTGG  |
| _LOC100049805 |       | -1019 | -1007 | -    | 7.97 GTCAATTAGTGG  |
| LOC100052229  |       | -0968 | -956  | -    | 7.97 GTCAATTAGTGG  |
| VPS36         | -1026 | -1014 | -     | 5.69 | GTTATACATGAA       |
| .EK5          | -1025 | -1013 | +     | 3.18 | CTAGTATTTATT       |
| WDFY2         | -0991 | -979  | -     | 8.82 | GTTAACATATGGG      |
| EBPL          | -0967 | -955  | -     | 4.20 | GTTCCTATTAA        |
| GPR21         | -1004 | -992  | +     | 7.28 | TCAATATTTAAG       |
| ZBTB6         | -0971 | -959  | +     | 2.78 | TCAGTAAGTCAC       |
| LOC100071264  |       | -1020 | -1008 | -    | 3.82 GATAATCACTGG  |
| LOC100071264  |       | -0977 | -965  | -    | 4.88 GCTACACATTGA  |
| LOC100071332  |       | -1024 | -1012 | -    | 2.65 TTTACTTATGAG  |
| LOC100071338  |       | -1013 | -1001 | +    | 4.10 TTAATGGTTGAG  |
| LOC100071460  |       | -1027 | -1015 | -    | 3.47 TTTAATTAGGAA  |
| LOC100071469  |       | -0992 | -980  | -    | 3.73 AACAAATATTAA  |
| MTRF1L        | -1020 | -1008 | +     | 4.53 | CCCATATTTTAC       |
| SY.E1         | -0967 | -955  | -     | 4.37 | GATACTCATTGA       |
| MYCT1         | -0990 | -978  | +     | 3.98 | TTACTATGTTAC       |
| RGS17         | -0964 | -952  | +     | 7.46 | TTAATAATTCAC       |

21 MA0063.1 Nkx2-5 8.26972553332 0.218487398433 -2488:-2449  
1.58384961451e-05

|              |       |       |   |      |         |
|--------------|-------|-------|---|------|---------|
| list of hits |       |       |   |      |         |
| MIR331       | -2487 | -2480 | + | 7.00 | TTAAGTG |
| SLC01B3      | -2486 | -2479 | + | 7.10 | ATAATTG |
| DGKD         | -2456 | -2449 | + | 7.35 | TTAATTG |
| GSG1         | -2481 | -2474 | + | 6.06 | TTAATTT |
| GSG1         | -2460 | -2453 | + | 6.75 | ATAAGTG |
| RYBP         | -2449 | -2442 | - | 7.00 | CACTTAA |
| EIF4E3       | -2465 | -2458 | - | 7.10 | CAATTAT |
| FOXP1        | -2486 | -2479 | - | 7.35 | CAATTAA |
| APBA1        | -2453 | -2446 | - | 6.06 | AAATTAA |

|               |       |       |       |      |              |
|---------------|-------|-------|-------|------|--------------|
| _KA.K1        | -2473 | -2466 | -     | 6.06 | AAATTAA      |
| ARL11         | -2477 | -2470 | -     | 6.10 | CTATTAT      |
| TE.M4         | -2449 | -2442 | +     | 6.18 | TCAATTG      |
| RC3H2         | -2458 | -2451 | +     | 6.06 | TTAATTT      |
| _LOC100071297 |       | -2483 | -2476 | +    | 6.18 TCAATTG |
| LOC100071329  |       | -2477 | -2470 | +    | 7.00 TTAAGTG |
| LOC100071329  |       | -2458 | -2451 | +    | 6.10 ATAATAG |
| LOC100071358  |       | -2488 | -2481 | +    | 7.00 TTAAGTG |
| LOC100071407  |       | -2487 | -2480 | -    | 5.99 CTCCTAA |
| LOC100071438  |       | -2458 | -2451 | +    | 6.18 TCAATTG |
| LOC100071420  |       | -2478 | -2471 | +    | 6.35 TTAATAG |
| LOC100071445  |       | -2488 | -2481 | +    | 6.18 TCAATTG |
| LOC100071448  |       | -2480 | -2473 | +    | 5.99 TTAAGAG |
| MTRF1L        | -2473 | -2466 | -     | 7.00 | CACTTAA      |

22 MA0136.1 ELF5 8.69309550562 0.429292928841 -1290:-1231  
1.76063872487e-05

## list of hits

|              |       |       |       |      |                |
|--------------|-------|-------|-------|------|----------------|
| .R2C1        | -1241 | -1232 | -     | 6.19 | AAGGAAGAG      |
| SLC01A2      | -1261 | -1252 | +     | 6.70 | GATTTCCCTT     |
| KC.J13       | -1278 | -1269 | -     | 6.47 | AAGGAATTA      |
| PDE6H        | -1233 | -1224 | -     | 6.26 | AAGGATGAA      |
| MGP          | -1233 | -1224 | +     | 6.27 | CATTTCCGG      |
| ATF7IP       | -1289 | -1280 | +     | 7.41 | AATTTCCCTG     |
| EIF4E3       | -1265 | -1256 | -     | 6.56 | CCGGAATTT      |
| FOXP1        | -1256 | -1247 | +     | 7.15 | TGTTTCCTT      |
| PGM5         | -1249 | -1240 | -     | 8.56 | AAGGAAATA      |
| FAM122A      | -1269 | -1260 | +     | 6.13 | CATTTCCCTA     |
| PIP5K1B      | -1290 | -1281 | -     | 6.20 | GAGGAAACA      |
| PIP5K1B      | -1265 | -1256 | -     | 6.98 | AAGGAAGAA      |
| STXBP6       | -1287 | -1278 | +     | 6.82 | TTTTTCCTT      |
| LOC100052638 |       | -1250 | -1241 | -    | 6.81 GAGGAAATG |
| LOC100052689 |       | -1261 | -1252 | -    | 6.81 GAGGAAATG |
| CKAP2        | -1284 | -1275 | +     | 6.18 | TTTTTCCTG      |
| CKAP2        | -1231 | -1222 | +     | 7.93 | CACTTCCTT      |
| ATP7B        | -1258 | -1249 | +     | 6.93 | TATTTCCCTA     |
| SERPI.E3     |       | -1236 | -1227 | -    | 6.30 TAGGAAGTG |
| KC.RG        | -1246 | -1237 | -     | 6.33 | AAGGAAAGA      |
| MIR708       | -1246 | -1237 | +     | 7.35 | TAGTTCCTT      |
| EVA1B        | -1245 | -1236 | +     | 7.10 | AATTTCCCTC     |
| AGO3         | -1288 | -1279 | -     | 6.69 | CAGGATATT      |
| C2H1orf216   |       | -1285 | -1276 | +    | 6.34 TTCTTCCTG |
| C2H1orf216   |       | -1239 | -1230 | +    | 6.09 AACTTCCCT |
| PSMB2        | -1257 | -1248 | -     | 6.12 | AAGGATCTT      |
| RABGAP1      | -1270 | -1261 | +     | 6.97 | CACTTCCTC      |
| RABGAP1      | -1236 | -1227 | +     | 6.33 | TCTTTCCTT      |
| ZBTB6        | -1237 | -1228 | +     | 6.20 | AAGTTCCTG      |
| LOC100071189 |       | -1285 | -1276 | -    | 6.15 ATGGATGTA |
| LOC100071189 |       | -1238 | -1229 | +    | 6.64 AGTTTCCTT |
| LOC100071270 |       | -1273 | -1264 | -    | 7.57 CAGGAAGTT |
| LOC100071438 |       | -1238 | -1229 | +    | 7.87 TACTTCCGT |
| LOC100071420 |       | -1271 | -1262 | +    | 6.88 TATATCCTC |
| FBXO5        | -1276 | -1267 | -     | 6.33 | AAGGAAAGA      |
| SY.E1        | -1257 | -1248 | -     | 6.67 | CAGGAAGCA      |

23 MA0087.1 Sox5 10.8307137621 0.198757763952 -2646:-2530  
1.92617159936e-05

## list of hits

|            |       |       |       |      |              |
|------------|-------|-------|-------|------|--------------|
| FGD6       | -2630 | -2623 | +     | 7.41 | GAACAAT      |
| I.PP5D     | -2566 | -2559 | -     | 8.38 | ATTGTTT      |
| .EU2       | -2627 | -2620 | -     | 8.38 | ATTGTTT      |
| WBP11      | -2600 | -2593 | +     | 8.38 | TAACAAT      |
| ARHGDIB    | -2555 | -2548 | +     | 7.69 | CAACAAT      |
| C6H12orf60 |       | -2599 | -2592 | +    | 8.38 AAACAAT |
| SMCO3      | -2543 | -2536 | +     | 7.41 | GAACAAT      |
| FOXP1      | -2646 | -2639 | +     | 8.38 | AAACAAT      |
| CBWD1      | -2634 | -2627 | +     | 7.41 | GAACAAT      |
| PGM5       | -2554 | -2547 | +     | 7.69 | CAACAAT      |
| _PTAR1     | -2598 | -2591 | +     | 8.38 | AAACAAT      |

|               |       |       |       |      |         |         |
|---------------|-------|-------|-------|------|---------|---------|
| DOCK8         | -2532 | -2525 | -     | 8.38 | ATTGTTT |         |
| FAM124A       | -2557 | -2550 | -     | 7.41 | ATTGTTC |         |
| MIR16-2       | -2593 | -2586 | +     | 7.69 | CAACAAT |         |
| DLEU7         | -2645 | -2638 | +     | 8.38 | AAACAAT |         |
| AGO1          | -2530 | -2523 | +     | 8.38 | TAACAAT |         |
| TEKT2         | -2624 | -2617 | +     | 8.38 | TAACAAT |         |
| KIAA0319L     |       | -2603 | -2596 | -    | 7.41    | ATTGTTC |
| ZMYM4         | -2551 | -2544 | +     | 7.69 | CAACAAT |         |
| STRBP         | -2640 | -2633 | +     | 8.38 | AAACAAT |         |
| _LOC100071170 |       | -2548 | -2541 | +    | 7.69    | CAACAAT |
| LOC100071189  |       | -2536 | -2529 | -    | 8.38    | ATTGTTT |
| LOC100071258  |       | -2604 | -2597 | -    | 7.41    | ATTGTTC |
| LOC100071227  |       | -2625 | -2618 | -    | 8.38    | ATTGTTT |
| LOC100071264  |       | -2620 | -2613 | +    | 8.38    | AAACAAT |
| LOC100071358  |       | -2600 | -2593 | -    | 8.38    | ATTGTTA |
| LOC100071358  |       | -2586 | -2579 | -    | 8.38    | ATTGTTA |
| LOC100071438  |       | -2646 | -2639 | -    | 8.38    | ATTGTTT |
| LOC100071448  |       | -2557 | -2550 | +    | 7.41    | GAACAAT |
| LOC100071460  |       | -2576 | -2569 | -    | 7.69    | ATTGTTG |
| FBXO5         | -2586 | -2579 | +     | 8.38 | AAACAAT |         |

24 MA0113.1 NR3C1 14.7489180922 0.432098770583 -317:-282  
1.97336073377e-05

## list of hits

|               |       |       |      |       |                          |
|---------------|-------|-------|------|-------|--------------------------|
| .DUFA12       | -0308 | -290  | +    | 6.79  | GGGAACCTTCTGTCGTGG       |
| SLC01B3       | -0311 | -293  | +    | 5.93  | GAAAGCAGCTTTTACTGC       |
| ERP27         | -0282 | -264  | -    | 5.77  | TGGGAACAGTTTGATCCC       |
| ARHGDIB       | -0283 | -265  | -    | 11.18 | TTAGAACATTTTTTTTTTT      |
| SMCO3         | -0294 | -276  | +    | 9.41  | GAGAAAATAAAATTTCTGT      |
| TMEM252       | -0301 | -283  | +    | 5.94  | GAGAGCATTCCTCCCCAG       |
| LOC100052292  |       | -0289 | -271 | -     | 4.87 CCTGGTCTTATTGGCCTT  |
| CKAP2         | -0317 | -299  | -    | 5.31  | TCTGAACATTTTCGTTTT       |
| CCDC70        | -0314 | -296  | +    | 4.69  | GGTAACAATCATTTCTGA       |
| MIR15A        | -0298 | -280  | -    | 5.99  | GCAGCACATAATGGTTTG       |
| DLEU7         | -0304 | -286  | -    | 4.52  | CTCCAAAGTAATTTCCCTT      |
| RC3H2         | -0313 | -295  | -    | 5.99  | CTAGGTCGGGATCCCTCC       |
| LOC100071251  |       | -0295 | -277 | -     | 6.36 CTTGATCAAATTGTCCTT  |
| _LOC100071297 |       | -0309 | -291 | +     | 5.88 GGAAACCACATGTCCAGT  |
| LOC100071329  |       | -0285 | -267 | +     | 4.64 CAGAGCAGTGTGTCCAAG  |
| LOC100071346  |       | -0286 | -268 | +     | 5.28 GGGAGAAAACATGAAGTAG |
| LOC100071338  |       | -0284 | -266 | -     | 6.33 AAAGAACATTCTTCCTCT  |
| LOC100071402  |       | -0285 | -267 | +     | 4.35 CAGAGCAGAGTGTCCAAG  |
| LOC100071438  |       | -0294 | -276 | +     | 7.60 AGAATCAACCAGTCCAGT  |
| LOC100071448  |       | -0307 | -289 | -     | 4.69 CTTGAAAGGATTTTATCT  |

25 MA0078.1 Sox17 10.5018372033 0.383512551426 -2872:-2781  
1.98290157695e-05

## list of hits

|              |       |       |       |      |           |           |
|--------------|-------|-------|-------|------|-----------|-----------|
| FGD6         | -2835 | -2826 | -     | 7.13 | AACAATGGA |           |
| SLC01C1      | -2788 | -2779 | -     | 7.87 | GACAATAGA |           |
| CHR.G        | -2870 | -2861 | +     | 6.24 | CTCATTGGC |           |
| PDE6H        | -2842 | -2833 | +     | 8.03 | TCCATTGTG |           |
| SMCO3        | -2859 | -2850 | +     | 7.44 | TTCATTGTT |           |
| GSG1         | -2850 | -2841 | +     | 8.03 | TCCATTGTG |           |
| PROK2        | -2835 | -2826 | +     | 8.10 | ATCATTGTG |           |
| PGM5         | -2781 | -2772 | +     | 8.56 | TCCATTGTC |           |
| SMC2         | -2865 | -2856 | +     | 7.63 | AGCATGTG  |           |
| _KA.K1       | -2831 | -2822 | -     | 6.75 | AACAATAAA |           |
| LOC100052951 |       | -2796 | -2787 | -    | 7.95      | CACAATGAC |
| LOC100147522 |       | -2816 | -2807 | -    | 6.94      | CACAATATC |
| ATP7B        | -2863 | -2854 | -     | 6.19 | AACAATATT |           |
| ATP7B        | -2800 | -2791 | -     | 6.75 | AACAATAAA |           |
| TRIM13       | -2866 | -2857 | +     | 7.09 | ACTATTGTG |           |
| KC.RG        | -2836 | -2827 | +     | 6.26 | GGTATTGTG |           |
| MIR16-2      | -2831 | -2822 | -     | 6.44 | AACAATATG |           |
| R.ASEH2B     |       | -2805 | -2796 | -    | 7.95      | CACAATGAC |
| OSCP1        | -2785 | -2776 | +     | 8.35 | TTCATTGTG |           |
| AGO1         | -2864 | -2855 | +     | 8.03 | TCCATTGTG |           |
| C2H1orf216   |       | -2786 | -2777 | -    | 7.13      | AACAATGGG |

|              |       |       |       |      |                |
|--------------|-------|-------|-------|------|----------------|
| RABGAP1      | -2826 | -2817 | +     | 6.58 | CTAATTGTG      |
| ZBTB6        | -2832 | -2823 | -     | 6.75 | AACAATAAA      |
| LOC100071189 |       | -2791 | -2782 | -    | 7.13 AACAATGGA |
| LOC100071244 |       | -2782 | -2773 | +    | 6.58 CTAATTGTG |
| LOC100071218 |       | -2805 | -2796 | +    | 6.54 ACAATTGTC |
| OR1Q1        | -2855 | -2846 | -     | 6.39 | GACAATTGC      |
| OR1Q1        | -2814 | -2805 | -     | 7.10 | GACAATTAG      |
| OR1B1        | -2781 | -2772 | -     | 7.34 | CACAATATA      |
| LOC100071338 |       | -2872 | -2863 | -    | 7.87 GACAATATG |
| LOC100071338 |       | -2810 | -2801 | -    | 6.50 AACAATAAT |
| LOC100071407 |       | -2848 | -2839 | -    | 6.44 AACAATATA |
| LOC100071438 |       | -2834 | -2825 | -    | 7.34 CACAATAGG |
| LOC100071420 |       | -2820 | -2811 | -    | 7.44 AACAATGAA |
