# Supplementary material for: Identification and Functional Annotation of Genes Related to Horses’ Performance: From GWAS to Post-GWAS
Source: MDPI journal article supplement (doi:10.3390/ani10071173), 2020-07-10
Supplement: s1 [file s1]

## ;TFM Explorer

;Date : Wed May 13 06:26:55 2020  
 ;Scanned location : -3000:300  
 ;Scanned sequences : None (16 sequences)  
 ;Scanned matrices : (130 matrices)  
 ;Parameters : minsize= 30, maxsize= 1500, ratio=3.0, top=25

;

## ; headers

; 1 rank window rank  
 ; 2 matrix matrix name  
 ; 3 tf transcription factor name  
 ; 4 info information of content of the matrix  
 ; 5 gc gc content of the matrix (G+C)%  
 ; 6 location location of the window (relatively to TSS)  
 ; 7 pvalue pvalue of the window

1 MA0056.1 MZF1\_1-4 8.58551308885 0.724999990314 -2998:-1715  
 4.13199505302e-17

## list of hits

|              |       |       |   |      |        |
|--------------|-------|-------|---|------|--------|
| LOC102151104 | -2173 | -2167 | + | 7.05 | TGGGGA |
| INPP5J       | -2722 | -2716 | + | 7.05 | TGGGGA |
| SMTN         | -2984 | -2978 | - | 7.05 | TCCCCA |
| SMTN         | -2281 | -2275 | - | 7.05 | TCCCCA |
| SMTN         | -1816 | -1810 | - | 7.05 | TCCCCA |
| OSBP2        | -2000 | -1994 | - | 7.05 | TCCCCA |
| OSBP2        | -1897 | -1891 | + | 7.05 | TGGGGA |
| OSBP2        | -1839 | -1833 | - | 7.05 | TCCCCA |
| OSBP2        | -1715 | -1709 | + | 7.05 | TGGGGA |
| CNTN3        | -2413 | -2407 | + | 7.05 | TGGGGA |
| PDZRN3       | -2462 | -2456 | - | 7.05 | TCCCCA |
| PPP4R2       | -2937 | -2931 | + | 7.05 | TGGGGA |
| PPP4R2       | -1968 | -1962 | + | 7.05 | TGGGGA |
| PPP4R2       | -1875 | -1869 | - | 7.05 | TCCCCA |
| GXYLT2       | -2265 | -2259 | - | 7.05 | TCCCCA |
| VARS2        | -2345 | -2339 | + | 7.05 | TGGGGA |
| VARS2        | -2107 | -2101 | + | 7.05 | TGGGGA |
| VARS2        | -1977 | -1971 | + | 7.05 | TGGGGA |
| SFTA2        | -2848 | -2842 | + | 7.05 | TGGGGA |
| SFTA2        | -2827 | -2821 | + | 7.05 | TGGGGA |
| SFTA2        | -2806 | -2800 | + | 7.05 | TGGGGA |
| SFTA2        | -2785 | -2779 | + | 7.05 | TGGGGA |
| SFTA2        | -2764 | -2758 | + | 7.05 | TGGGGA |
| SFTA2        | -2743 | -2737 | + | 7.05 | TGGGGA |
| SFTA2        | -2722 | -2716 | + | 7.05 | TGGGGA |
| SFTA2        | -2701 | -2695 | + | 7.05 | TGGGGA |
| SFTA2        | -2680 | -2674 | + | 7.05 | TGGGGA |
| SFTA2        | -2659 | -2653 | + | 7.05 | TGGGGA |
| SFTA2        | -2638 | -2632 | + | 7.05 | TGGGGA |
| SFTA2        | -2617 | -2611 | + | 7.05 | TGGGGA |
| SFTA2        | -2596 | -2590 | + | 7.05 | TGGGGA |
| SFTA2        | -2575 | -2569 | + | 7.05 | TGGGGA |
| SFTA2        | -2554 | -2548 | + | 7.05 | TGGGGA |
| SFTA2        | -2533 | -2527 | + | 7.05 | TGGGGA |
| SFTA2        | -2512 | -2506 | + | 7.05 | TGGGGA |
| SFTA2        | -2491 | -2485 | + | 7.05 | TGGGGA |
| SFTA2        | -2470 | -2464 | + | 7.05 | TGGGGA |
| SFTA2        | -2449 | -2443 | + | 7.05 | TGGGGA |
| SFTA2        | -2428 | -2422 | + | 7.05 | TGGGGA |
| SFTA2        | -2407 | -2401 | + | 7.05 | TGGGGA |
| SFTA2        | -2386 | -2380 | + | 7.05 | TGGGGA |
| SFTA2        | -2365 | -2359 | + | 7.05 | TGGGGA |
| SFTA2        | -2344 | -2338 | + | 7.05 | TGGGGA |
| SFTA2        | -2323 | -2317 | + | 7.05 | TGGGGA |
| SFTA2        | -2302 | -2296 | + | 7.05 | TGGGGA |
| SFTA2        | -2281 | -2275 | + | 7.05 | TGGGGA |
| SFTA2        | -2260 | -2254 | + | 7.05 | TGGGGA |
| SFTA2        | -2239 | -2233 | + | 7.05 | TGGGGA |
| SFTA2        | -2218 | -2212 | + | 7.05 | TGGGGA |

|         |       |       |   |      |        |
|---------|-------|-------|---|------|--------|
| SFTA2   | -2197 | -2191 | + | 7.05 | TGGGGA |
| SFTA2   | -2176 | -2170 | + | 7.05 | TGGGGA |
| SFTA2   | -2155 | -2149 | + | 7.05 | TGGGGA |
| SFTA2   | -2134 | -2128 | + | 7.05 | TGGGGA |
| SFTA2   | -2113 | -2107 | + | 7.05 | TGGGGA |
| SFTA2   | -2092 | -2086 | + | 7.05 | TGGGGA |
| SFTA2   | -1762 | -1756 | - | 7.05 | TCCCCA |
| SFTA2   | -1737 | -1731 | - | 7.05 | TCCCCA |
| _GTF2H4 | -2998 | -2992 | + | 7.05 | TGGGGA |
| _GTF2H4 | -1923 | -1917 | - | 7.05 | TCCCCA |
| DAP     | -2333 | -2327 | - | 7.05 | TCCCCA |
| CCT5    | -2855 | -2849 | + | 7.05 | TGGGGA |
| CCT5    | -2758 | -2752 | + | 7.05 | TGGGGA |
| CCT5    | -2424 | -2418 | + | 7.05 | TGGGGA |
| FAM173B | -2961 | -2955 | - | 7.05 | TCCCCA |
| FAM173B | -2942 | -2936 | - | 7.05 | TCCCCA |
| FAM173B | -2838 | -2832 | - | 7.05 | TCCCCA |
| FAM173B | -2335 | -2329 | + | 7.05 | TGGGGA |

2 MA0105.1 NFKB1 15.6269628514 0.757575756447 -2853:-2092  
8.82183505816e-17

list of hits

|              |       |       |   |      |              |
|--------------|-------|-------|---|------|--------------|
| LOC102151104 | -2319 | -2308 | + | 6.30 | GGGGCTGCCCT  |
| INPP5J       | -2381 | -2370 | - | 3.75 | TGGGAACCCCTC |
| INPP5J       | -2092 | -2081 | + | 3.63 | GGCGGTTCCTCC |
| SMTN         | -2745 | -2734 | + | 3.78 | AGGGGTGTCCC  |
| SMTN         | -2562 | -2551 | + | 3.71 | TGGGCTTTCCC  |
| CNTN3        | -2832 | -2821 | - | 2.99 | GGGCCACTCCC  |
| CNTN3        | -2576 | -2565 | + | 5.52 | GGGGGT'TTGCC |
| PPP4R2       | -2654 | -2643 | - | 2.97 | TGGGATCCCTC  |
| PPP4R2       | -2583 | -2572 | - | 2.84 | GGAGGACCCAC  |
| SFTA2        | -2847 | -2836 | + | 3.16 | GGGGAGACCCG  |
| SFTA2        | -2826 | -2815 | + | 3.03 | GGGGAGACTCC  |
| SFTA2        | -2805 | -2794 | + | 3.03 | GGGGAGACTCC  |
| SFTA2        | -2784 | -2773 | + | 3.03 | GGGGAGACTCC  |
| SFTA2        | -2763 | -2752 | + | 3.16 | GGGGAGACCCG  |
| SFTA2        | -2742 | -2731 | + | 3.03 | GGGGAGACTCC  |
| SFTA2        | -2721 | -2710 | + | 3.16 | GGGGAGACCCG  |
| SFTA2        | -2700 | -2689 | + | 3.03 | GGGGAGACTCC  |
| SFTA2        | -2679 | -2668 | + | 3.16 | GGGGAGACCCG  |
| SFTA2        | -2658 | -2647 | + | 3.03 | GGGGAGACTCC  |
| SFTA2        | -2616 | -2605 | + | 3.03 | GGGGAGACTCC  |
| SFTA2        | -2595 | -2584 | + | 3.03 | GGGGAGACTCC  |
| SFTA2        | -2574 | -2563 | + | 3.16 | GGGGAGACCCG  |
| SFTA2        | -2553 | -2542 | + | 3.03 | GGGGAGACTCC  |
| SFTA2        | -2532 | -2521 | + | 3.16 | GGGGAGACCCG  |
| SFTA2        | -2511 | -2500 | + | 3.03 | GGGGAGACTCC  |
| SFTA2        | -2490 | -2479 | + | 3.16 | GGGGAGACCCG  |
| SFTA2        | -2469 | -2458 | + | 3.03 | GGGGAGACTCC  |
| SFTA2        | -2427 | -2416 | + | 3.03 | GGGGAGACTCC  |
| SFTA2        | -2406 | -2395 | + | 3.03 | GGGGAGACTCC  |
| SFTA2        | -2385 | -2374 | + | 3.16 | GGGGAGACCCG  |
| SFTA2        | -2364 | -2353 | + | 3.03 | GGGGAGACTCC  |
| SFTA2        | -2343 | -2332 | + | 3.16 | GGGGAGACCCG  |
| SFTA2        | -2322 | -2311 | + | 3.03 | GGGGAGACTCC  |
| SFTA2        | -2280 | -2269 | + | 3.03 | GGGGAGACTCC  |
| SFTA2        | -2259 | -2248 | + | 3.16 | GGGGAGACCCG  |
| SFTA2        | -2238 | -2227 | + | 3.03 | GGGGAGACTCC  |
| SFTA2        | -2217 | -2206 | + | 3.16 | GGGGAGACCCG  |
| SFTA2        | -2196 | -2185 | + | 3.03 | GGGGAGACTCC  |
| SFTA2        | -2175 | -2164 | + | 3.16 | GGGGAGACCCG  |
| SFTA2        | -2154 | -2143 | + | 3.03 | GGGGAGACTCC  |
| SFTA2        | -2133 | -2122 | + | 3.03 | GGGGAGACTCC  |
| SFTA2        | -2112 | -2101 | + | 3.03 | GGGGAGACTCC  |
| DAP          | -2329 | -2318 | - | 3.40 | CAGAAATCCCC  |
| CCT5         | -2853 | -2842 | - | 3.71 | GGGAAAGCACC  |
| CCT5         | -2806 | -2795 | + | 6.97 | GGGGAGGCCCG  |
| FAM173B      | -2686 | -2675 | + | 4.07 | GGGGGT'TGCCA |

3 MA0061.1 NF-kappaB 13.3447617922 0.621052631736 -2847:-2110  
5.69947050142e-11

## list of hits

|              |       |       |   |      |            |
|--------------|-------|-------|---|------|------------|
| LOC102151104 | -2319 | -2309 | + | 7.45 | GGGGCTGCCC |
| SMTN         | -2744 | -2734 | + | 7.09 | GGGGTGTTCC |
| SMTN         | -2561 | -2551 | - | 7.14 | GGGCTTTTCC |
| PDZRN3       | -2230 | -2220 | - | 4.91 | AGAAGGTCCC |
| SFTA2        | -2847 | -2837 | + | 5.01 | GGGGAGACCC |
| SFTA2        | -2824 | -2814 | - | 5.73 | GGAGACTCCC |
| SFTA2        | -2803 | -2793 | - | 5.73 | GGAGACTCCC |
| SFTA2        | -2782 | -2772 | - | 5.73 | GGAGACTCCC |
| SFTA2        | -2763 | -2753 | + | 5.01 | GGGGAGACCC |
| SFTA2        | -2740 | -2730 | - | 5.73 | GGAGACTCCC |
| SFTA2        | -2721 | -2711 | + | 5.01 | GGGGAGACCC |
| SFTA2        | -2698 | -2688 | - | 5.73 | GGAGACTCCC |
| SFTA2        | -2679 | -2669 | + | 5.01 | GGGGAGACCC |
| SFTA2        | -2656 | -2646 | - | 5.73 | GGAGACTCCC |
| SFTA2        | -2614 | -2604 | - | 5.73 | GGAGACTCCC |
| SFTA2        | -2593 | -2583 | - | 5.73 | GGAGACTCCC |
| SFTA2        | -2574 | -2564 | + | 5.01 | GGGGAGACCC |
| SFTA2        | -2551 | -2541 | - | 5.73 | GGAGACTCCC |
| SFTA2        | -2532 | -2522 | + | 5.01 | GGGGAGACCC |
| SFTA2        | -2509 | -2499 | - | 5.73 | GGAGACTCCC |
| SFTA2        | -2490 | -2480 | + | 5.01 | GGGGAGACCC |
| SFTA2        | -2467 | -2457 | - | 5.73 | GGAGACTCCC |
| SFTA2        | -2425 | -2415 | - | 5.73 | GGAGACTCCC |
| SFTA2        | -2404 | -2394 | - | 5.73 | GGAGACTCCC |
| SFTA2        | -2385 | -2375 | + | 5.01 | GGGGAGACCC |
| SFTA2        | -2362 | -2352 | - | 5.73 | GGAGACTCCC |
| SFTA2        | -2343 | -2333 | + | 5.01 | GGGGAGACCC |
| SFTA2        | -2320 | -2310 | - | 5.73 | GGAGACTCCC |
| SFTA2        | -2278 | -2268 | - | 5.73 | GGAGACTCCC |
| SFTA2        | -2259 | -2249 | + | 5.01 | GGGGAGACCC |
| SFTA2        | -2236 | -2226 | - | 5.73 | GGAGACTCCC |
| SFTA2        | -2217 | -2207 | + | 5.01 | GGGGAGACCC |
| SFTA2        | -2194 | -2184 | - | 5.73 | GGAGACTCCC |
| SFTA2        | -2175 | -2165 | + | 5.01 | GGGGAGACCC |
| SFTA2        | -2152 | -2142 | - | 5.73 | GGAGACTCCC |
| SFTA2        | -2131 | -2121 | - | 5.73 | GGAGACTCCC |
| SFTA2        | -2110 | -2100 | - | 5.73 | GGAGACTCCC |
| DAP          | -2517 | -2507 | - | 5.06 | GCAAAGTCCC |
| DAP          | -2328 | -2318 | - | 7.85 | AGAAATCCCC |
| CCT5         | -2806 | -2796 | + | 5.66 | GGGGAGGCCC |

4 MA0107.1 RELA 14.7568335332 0.566666663438 -2852:-2110  
4.58380391565e-07

## list of hits

|        |       |       |   |      |            |
|--------|-------|-------|---|------|------------|
| SELM   | -2801 | -2791 | - | 6.42 | GGAAAACCAC |
| SMTN   | -2562 | -2552 | + | 9.00 | TGGGCTTTTC |
| SMTN   | -2527 | -2517 | - | 4.43 | GGGAAGCCAG |
| CNTN3  | -2576 | -2566 | + | 4.58 | GGGGGTTTGC |
| PDZRN3 | -2134 | -2124 | + | 3.79 | CAGACTTTTC |
| PPP4R2 | -2545 | -2535 | + | 3.94 | TGGCCTTTTC |
| PPP4R2 | -2342 | -2332 | - | 4.71 | GGAATCCCAG |
| VAR2   | -2266 | -2256 | - | 4.48 | GGAAATCTCG |
| SFTA2  | -2824 | -2814 | - | 5.03 | GGAGACTCCC |
| SFTA2  | -2803 | -2793 | - | 5.03 | GGAGACTCCC |
| SFTA2  | -2782 | -2772 | - | 5.03 | GGAGACTCCC |
| SFTA2  | -2740 | -2730 | - | 5.03 | GGAGACTCCC |
| SFTA2  | -2698 | -2688 | - | 5.03 | GGAGACTCCC |
| SFTA2  | -2656 | -2646 | - | 5.03 | GGAGACTCCC |
| SFTA2  | -2614 | -2604 | - | 5.03 | GGAGACTCCC |
| SFTA2  | -2593 | -2583 | - | 5.03 | GGAGACTCCC |
| SFTA2  | -2551 | -2541 | - | 5.03 | GGAGACTCCC |
| SFTA2  | -2509 | -2499 | - | 5.03 | GGAGACTCCC |
| SFTA2  | -2467 | -2457 | - | 5.03 | GGAGACTCCC |
| SFTA2  | -2425 | -2415 | - | 5.03 | GGAGACTCCC |
| SFTA2  | -2404 | -2394 | - | 5.03 | GGAGACTCCC |
| SFTA2  | -2362 | -2352 | - | 5.03 | GGAGACTCCC |

|         |       |       |   |      |            |
|---------|-------|-------|---|------|------------|
| SFTA2   | -2320 | -2310 | - | 5.03 | GGAGACTCCC |
| SFTA2   | -2278 | -2268 | - | 5.03 | GGAGACTCCC |
| SFTA2   | -2236 | -2226 | - | 5.03 | GGAGACTCCC |
| SFTA2   | -2194 | -2184 | - | 5.03 | GGAGACTCCC |
| SFTA2   | -2152 | -2142 | - | 5.03 | GGAGACTCCC |
| SFTA2   | -2131 | -2121 | - | 5.03 | GGAGACTCCC |
| SFTA2   | -2110 | -2100 | - | 5.03 | GGAGACTCCC |
| DAP     | -2517 | -2507 | - | 4.74 | GCAAAGTCCC |
| DAP     | -2328 | -2318 | - | 5.49 | AGAAATCCCC |
| CCT5    | -2852 | -2842 | - | 4.29 | GGAAAGCACC |
| FAM173B | -2686 | -2676 | + | 4.69 | GGGGGTTCGC |

5 MA0136.1 ELF5 8.69309550562 0.429292928841 -1166:-919  
1.3954916116e-05

list of hits

|         |       |       |   |      |            |
|---------|-------|-------|---|------|------------|
| INPP5J  | -0969 | -960  | + | 6.08 | CACTTCCAT  |
| INPP5J  | -0924 | -915  | + | 6.97 | CACTTCCTC  |
| OSBP2   | -1151 | -1142 | - | 6.12 | AAGGATCTT  |
| OSBP2   | -1023 | -1014 | - | 6.08 | ATGGAAGTG  |
| PDZRN3  | -1158 | -1149 | - | 6.82 | AAGGAAAAA  |
| PPP4R2  | -1150 | -1141 | + | 6.49 | TCCTTCCTT  |
| PPP4R2  | -1093 | -1084 | + | 6.48 | ATCTTCCTT  |
| PPP4R2  | -0919 | -910  | + | 6.21 | GACTTCCTG  |
| GXYLT2  | -1008 | -999  | - | 6.25 | GAGGATGTG  |
| VAR2    | -1166 | -1157 | + | 6.13 | CATTTCCCTA |
| SFTA2   | -1101 | -1092 | - | 7.15 | AAGGAAACA  |
| _GTF2H4 | -1115 | -1106 | + | 6.03 | CTTTTCCTT  |
| ARL15   | -1100 | -1091 | - | 6.49 | AAGGAAGGA  |
| ARL15   | -1060 | -1051 | - | 6.51 | CAGGAAACA  |
| ARL15   | -1019 | -1010 | - | 6.37 | ATGGAAGTT  |
| CCT5    | -0979 | -970  | + | 6.31 | ATTTTCCTT  |
| CCT5    | -0955 | -946  | + | 7.05 | CATATCCTT  |
| CCT5    | -0919 | -910  | - | 6.48 | AAGGAAGAT  |
| FAM173B | -1093 | -1084 | + | 6.98 | TTCTTCCTT  |
| FAM173B | -1084 | -1075 | - | 6.59 | AAGGATGCA  |

6 MA0081.1 SPIB 9.06007130057 0.466472323191 -2082:-1816  
1.41313176681e-05

list of hits

|              |       |       |   |      |          |
|--------------|-------|-------|---|------|----------|
| LOC102151104 | -2072 | -2065 | - | 7.82 | TTCCTCT  |
| LOC102151104 | -1832 | -1825 | - | 7.28 | TTCCTCA  |
| INPP5J       | -1921 | -1914 | - | 6.60 | TTCCCTT  |
| SELM         | -2082 | -2075 | + | 7.28 | TGAGGAA  |
| SMTN         | -2074 | -2067 | - | 7.28 | TTCTCTCA |
| OSBP2        | -1940 | -1933 | - | 6.55 | TTCTCTGA |
| CNTN3        | -1830 | -1823 | + | 7.09 | ACAGGAA  |
| CNTN3        | -1817 | -1810 | + | 7.82 | AGAGGAA  |
| PPP4R2       | -2010 | -2003 | - | 7.82 | TTCTCTCT |
| PPP4R2       | -1974 | -1967 | - | 7.82 | TTCTCTCT |
| GXYLT2       | -1985 | -1978 | + | 6.60 | AGGGGAA  |
| GXYLT2       | -1964 | -1957 | + | 6.60 | AGGGGAA  |
| GXYLT2       | -1888 | -1881 | + | 6.55 | TCAGGAA  |
| _GTF2H4      | -2014 | -2007 | - | 6.55 | TTCTCTGA |
| _GTF2H4      | -1816 | -1809 | + | 7.28 | TGAGGAA  |
| ARL15        | -1834 | -1827 | - | 6.60 | TTCCCTT  |
| DAP          | -1832 | -1825 | + | 6.60 | AGGGGAA  |
| CCT5         | -2077 | -2070 | - | 7.09 | TTCTCTGT |
| CCT5         | -2033 | -2026 | - | 7.82 | TTCTCTCT |

7 MA0114.1 HNF4A 9.61741431707 0.522388060843 -2633:-2545  
1.925686689e-05

list of hits

|        |       |       |   |      |               |
|--------|-------|-------|---|------|---------------|
| INPP5J | -2581 | -2568 | + | 5.87 | GAGCCAAAGGGCC |
| SELM   | -2545 | -2532 | - | 6.24 | TGGTTTTTGGTCT |
| SMTN   | -2627 | -2614 | - | 6.89 | AAAACTTTGCCCG |
| SMTN   | -2604 | -2591 | + | 9.80 | AGGGCAAAGACCA |
| SMTN   | -2574 | -2561 | - | 5.72 | TGACCCAGGCCT  |
| PPP4R2 | -2633 | -2620 | + | 6.42 | GGTCCAGAGCCCA |
| PPP4R2 | -2552 | -2539 | - | 6.57 | TTCACTCTGGCCT |

|         |       |       |   |      |                |
|---------|-------|-------|---|------|----------------|
| _GTF2H4 | -2596 | -2583 | + | 6.22 | AGGTCATAGTCCC  |
| _GTF2H4 | -2573 | -2560 | - | 6.05 | TGGCCTTTGTAGC  |
| ARL15   | -2560 | -2547 | - | 5.68 | TGGCCTCTTTTCCT |

8 MA0154.1 EBF1 11.5644748683 0.648000004888 -2625:-1923  
2.12523767164e-05

list of hits

|              |       |       |   |      |             |
|--------------|-------|-------|---|------|-------------|
| LOC102151104 | -2178 | -2168 | + | 6.13 | CCTCCTGGGG  |
| INPP5J       | -2386 | -2376 | + | 6.63 | CTCCCTGGGA  |
| INPP5J       | -2155 | -2145 | - | 5.68 | CCCCCTGGAG  |
| INPP5J       | -2118 | -2108 | + | 5.87 | CCTCCGGAGA  |
| INPP5J       | -2102 | -2092 | + | 6.70 | TCTCCAGGGG  |
| INPP5J       | -2084 | -2074 | - | 5.57 | TCCCTGGCAG  |
| SELM         | -2087 | -2077 | - | 6.07 | TCTCCTGAGG  |
| OSBP2        | -2625 | -2615 | + | 6.40 | CCCCAAGAGG  |
| OSBP2        | -2545 | -2535 | + | 8.04 | ACCCAGAGA   |
| OSBP2        | -2019 | -2009 | + | 5.88 | CCACCTGGGA  |
| CNTN3        | -2581 | -2571 | + | 7.03 | ACTCAGGGGG  |
| CNTN3        | -2199 | -2189 | + | 6.50 | GCTCATGGGA  |
| PDZRN3       | -2462 | -2452 | - | 6.64 | TCCCCAAGGG  |
| PPP4R2       | -2338 | -2328 | - | 7.78 | TCCCAGGAGG  |
| PPP4R2       | -2273 | -2263 | + | 6.84 | CTCCAAGGGG  |
| PPP4R2       | -1972 | -1962 | + | 7.70 | CCTCTGGGGA  |
| GXYLT2       | -2546 | -2536 | - | 8.19 | CCCCTTGAGT  |
| GXYLT2       | -1990 | -1980 | + | 6.01 | ATTCCAGGGG  |
| GXYLT2       | -1968 | -1958 | + | 6.24 | TTCCAGGGGA  |
| GXYLT2       | -1926 | -1916 | + | 6.41 | ATCAAAGGGA  |
| VAR2         | -2491 | -2481 | + | 5.40 | GTTCCTAGGGA |
| VAR2         | -2389 | -2379 | - | 7.74 | TCCCTTGTGG  |
| SFTA2        | -2608 | -2598 | - | 6.60 | TCCCTGAGAT  |
| SFTA2        | -2587 | -2577 | - | 6.90 | TCCCTGAGGC  |
| SFTA2        | -2419 | -2409 | - | 6.60 | TCCCTGAGAT  |
| SFTA2        | -2398 | -2388 | - | 6.90 | TCCCTGAGGC  |
| SFTA2        | -2146 | -2136 | - | 6.60 | TCCCTGAGAT  |
| SFTA2        | -2125 | -2115 | - | 6.90 | TCCCTGAGGC  |
| _GTF2H4      | -1923 | -1913 | - | 6.55 | TCCCCAGGAG  |
| DAP          | -2608 | -2598 | + | 8.18 | ACCACAGGGA  |
| DAP          | -2415 | -2405 | - | 6.29 | CCCCTTGTGT  |
| DAP          | -2268 | -2258 | - | 6.05 | CCCCTAGGAG  |
| CCT5         | -2512 | -2502 | - | 5.89 | TCCCTAAAGA  |
| FAM173B      | -2364 | -2354 | + | 6.89 | CCCCAGGAGA  |
| FAM173B      | -1956 | -1946 | - | 5.39 | TCCCTTTAAG  |

9 MA0144.1 Stat3 13.6006727062 0.505057099889 -2251:-1562  
2.88021019304e-05

list of hits

|              |       |       |   |      |             |
|--------------|-------|-------|---|------|-------------|
| LOC102151104 | -1715 | -1705 | - | 6.18 | CTTCCTAGGA  |
| LOC102151104 | -1674 | -1664 | - | 4.87 | CTTCCCGTGA  |
| LOC102151104 | -1624 | -1614 | - | 7.13 | CTTCCTGACA  |
| LOC102151104 | -1562 | -1552 | - | 7.47 | ATTCTGCGCA  |
| INPP5J       | -2245 | -2235 | - | 7.67 | CTTCCTGGCC  |
| INPP5J       | -2208 | -2198 | - | 7.01 | TTTCCAGGAG  |
| INPP5J       | -2085 | -2075 | - | 6.48 | CTCCCTGGCA  |
| INPP5J       | -1562 | -1552 | + | 6.58 | TGACGGGAAA  |
| SELM         | -2234 | -2224 | - | 5.60 | CTTCTAGGCA  |
| SMTN         | -2135 | -2125 | - | 7.76 | CTGCCAGGAA  |
| SMTN         | -1840 | -1830 | - | 5.25 | CTTCCTGGGC  |
| SMTN         | -1624 | -1614 | + | 5.62 | TTACAGTAAG  |
| OSBP2        | -2109 | -2099 | - | 4.62 | CTTCCAAGCC  |
| OSBP2        | -1951 | -1941 | - | 5.03 | CTTCCTAACA  |
| OSBP2        | -1941 | -1931 | - | 5.11 | CTTCCTGAAG  |
| OSBP2        | -1601 | -1591 | + | 4.99 | CCCAGGAAG   |
| PDZRN3       | -2208 | -2198 | + | 5.34 | TTCTAGGAGG  |
| PDZRN3       | -1804 | -1794 | - | 7.47 | ATTCTTGGCA  |
| PPP4R2       | -1565 | -1555 | - | 7.31 | CTTACAGGAA  |
| VAR2         | -1742 | -1732 | + | 4.97 | TTACAGAAAAG |
| SFTA2        | -1863 | -1853 | - | 6.00 | TTTCCAGGCC  |
| SFTA2        | -1707 | -1697 | + | 8.28 | TCCCAGGAAG  |
| SFTA2        | -1637 | -1627 | - | 6.07 | CTTCCCAGAC  |

|         |       |       |   |      |            |
|---------|-------|-------|---|------|------------|
| _GTF2H4 | -2214 | -2204 | + | 6.75 | AGCCAGGAAA |
| _GTF2H4 | -2015 | -2005 | - | 5.11 | CTTCCTGAAG |
| _GTF2H4 | -2001 | -1991 | - | 7.85 | GTTCCAGGAA |
| _GTF2H4 | -1936 | -1926 | - | 7.73 | CTTCAGGAG  |
| ARL15   | -1992 | -1982 | - | 6.98 | TTTCCTTGAA |
| ARL15   | -1698 | -1688 | + | 6.03 | TTCATGGAAA |
| DAP     | -2251 | -2241 | + | 4.86 | GGCTAGGAAA |
| DAP     | -2020 | -2010 | - | 5.39 | CTTTCAGGCA |
| CCT5    | -2078 | -2068 | - | 4.92 | TTTCCTGTGA |
| FAM173B | -1595 | -1585 | - | 7.35 | TTTCCTGTCA |

10 MA0133.1 BRCA1 5.26063524804 0.528239204415 -1431:-666  
3.64914061249e-05

list of hits

|              |       |       |   |      |         |
|--------------|-------|-------|---|------|---------|
| LOC102151104 | -1021 | -1014 | + | 6.30 | ACAACAC |
| INPP5J       | -0673 | -666  | - | 5.61 | CTGTTGG |
| INPP5J       | -0666 | -659  | + | 5.61 | CCAACAG |
| SMTN         | -0932 | -925  | - | 5.62 | CGGTTGT |
| SMTN         | -0706 | -699  | - | 6.30 | GTGTTGT |
| OSBP2        | -1431 | -1424 | + | 5.92 | ACAACAG |
| OSBP2        | -1192 | -1185 | + | 5.92 | ACAACAG |
| OSBP2        | -1055 | -1048 | - | 5.92 | CTGTTGT |
| CNTN3        | -0794 | -787  | + | 5.61 | CCAACAG |
| CNTN3        | -0705 | -698  | + | 5.61 | CCAACAG |
| PDZRN3       | -1344 | -1337 | + | 5.99 | CCAACAC |
| PDZRN3       | -1220 | -1213 | - | 5.90 | GTGTTGC |
| PPP4R2       | -0872 | -865  | + | 5.62 | ACAACCG |
| GXYLT2       | -1413 | -1406 | + | 6.00 | ACAACCC |
| GXYLT2       | -1338 | -1331 | - | 6.00 | GGGTTGT |
| GXYLT2       | -0884 | -877  | - | 6.00 | GGGTTGT |
| VAR2         | -1319 | -1312 | + | 5.92 | ACAACAG |
| VAR2         | -1289 | -1282 | + | 5.92 | ACAACAG |
| VAR2         | -1025 | -1018 | - | 6.00 | GGGTTGT |
| VAR2         | -0966 | -959  | - | 5.90 | GTGTTGC |
| SFTA2        | -1118 | -1111 | - | 6.00 | GGGTTGT |
| ARL15        | -1066 | -1059 | + | 5.69 | CCAACCC |
| DAP          | -0808 | -801  | - | 6.30 | GTGTTGT |
| CCT5         | -1248 | -1241 | + | 6.00 | ACAACCC |
| CCT5         | -0731 | -724  | + | 5.69 | CCAACCC |
| FAM173B      | -0858 | -851  | + | 6.30 | ACAACAC |

11 MA0095.1 YY1 8.10118848971 0.509803925951 -1115:-909  
4.13334442794e-05

list of hits

|        |       |       |   |      |        |
|--------|-------|-------|---|------|--------|
| INPP5J | -1115 | -1109 | + | 6.42 | ACCATC |
| INPP5J | -1109 | -1103 | + | 6.42 | ACCATC |
| INPP5J | -1049 | -1043 | + | 6.42 | ACCATC |
| INPP5J | -1030 | -1024 | + | 6.42 | ACCATC |
| INPP5J | -1000 | -994  | + | 6.42 | ACCATC |
| INPP5J | -0988 | -982  | + | 6.42 | ACCATC |
| INPP5J | -0909 | -903  | + | 6.42 | ACCATC |
| OSBP2  | -0925 | -919  | - | 6.42 | GATGGT |
| VAR2   | -0992 | -986  | + | 6.58 | GCCATC |
| VAR2   | -0954 | -948  | + | 6.42 | ACCATC |
| DAP    | -1024 | -1018 | - | 6.42 | GATGGT |
| CCT5   | -0932 | -926  | + | 6.42 | ACCATC |

12 MA0014.1 Pax5 12.4319606142 0.575000002235 -2812:-2490  
5.48442454772e-05

list of hits

|              |       |       |   |      |                       |
|--------------|-------|-------|---|------|-----------------------|
| LOC102151104 | -2616 | -2596 | - | 5.51 | TTTTCACTCTTCACATTTTA  |
| INPP5J       | -2717 | -2697 | + | 6.84 | AGCGAAAGGAAGGAGGACAG  |
| INPP5J       | -2683 | -2663 | - | 5.02 | TTGCCATCCACAGATGCCTC  |
| INPP5J       | -2493 | -2473 | - | 7.59 | CCTCTCTGCTTCCCAGGGCA  |
| OSBP2        | -2806 | -2786 | - | 5.32 | CTTCTCCCCCTCCAAGAACCA |
| OSBP2        | -2619 | -2599 | + | 5.57 | GAGGAAGTGCAGAGAGGCCT  |
| OSBP2        | -2548 | -2528 | + | 5.59 | GGCACCCAGAGAGGGGCAG   |
| CNTN3        | -2588 | -2568 | - | 5.56 | TTGTCACTCAGGGGGTTT    |
| PPP4R2       | -2790 | -2770 | + | 5.97 | TGTCTATTGCTGTGTAACAA  |

|         |       |       |   |      |                       |
|---------|-------|-------|---|------|-----------------------|
| PPP4R2  | -2680 | -2660 | - | 5.05 | TGGTCCCTCCAAGGGGCCCCG |
| VAR2    | -2704 | -2684 | + | 5.29 | GAATGAACAAAGAAGGACCA  |
| _GTF2H4 | -2812 | -2792 | - | 5.08 | CTGCTCCTCTCTGGTTTGT   |
| _GTF2H4 | -2631 | -2611 | - | 8.48 | CTTTTATGCTCCGCTGGCCT  |
| _GTF2H4 | -2503 | -2483 | - | 5.34 | TTGTCCCTCAGCAGTCTTCC  |
| DAP     | -2755 | -2735 | - | 5.41 | TTGTACACTTGGCCACACT   |
| DAP     | -2490 | -2470 | - | 5.99 | CTGCTCTGCCACCATTTGTCA |
| FAM173B | -2617 | -2597 | + | 6.91 | GGGCCGCTGAAGTGGAGCAT  |

13 MA0122.1 Nkx3-2 8.54224970754 0.462962961859 -452:-264  
5.88545819185e-05

list of hits

|              |       |      |   |      |           |
|--------------|-------|------|---|------|-----------|
| LOC102151104 | -0266 | -257 | + | 7.13 | TTGAGTGGG |
| SMTN         | -0452 | -443 | - | 6.74 | GTCACCTAG |
| SMTN         | -0264 | -255 | - | 7.28 | GCCACTTAC |
| PPP4R2       | -0381 | -372 | - | 6.66 | CTCACTTAA |
| GXYLT2       | -0435 | -426 | + | 6.33 | GTGAGTGGG |
| GXYLT2       | -0356 | -347 | + | 6.11 | TGGAGTGGG |
| GXYLT2       | -0344 | -335 | + | 6.44 | GTAAGTGAA |
| GXYLT2       | -0303 | -294 | + | 6.44 | CGGAGTGGG |
| VAR2         | -0402 | -393 | + | 6.29 | GCAAGTGGG |
| SFTA2        | -0430 | -421 | + | 6.53 | CTGAGTGCC |
| CCT5         | -0310 | -301 | + | 6.51 | GGAAGTGGG |
| FAM173B      | -0323 | -314 | - | 7.09 | TCCACTTGA |

14 MA0155.1 INSM1 14.8617070481 0.666666670392 -2165:-1951  
8.86960308607e-05

list of hits

|         |       |       |   |      |               |
|---------|-------|-------|---|------|---------------|
| INPP5J  | -2165 | -2153 | - | 4.88 | CACCCCTCACC   |
| INPP5J  | -2087 | -2075 | - | 4.79 | TTCTCCCTGGCA  |
| INPP5J  | -1972 | -1960 | - | 4.30 | CGCCCTGCTC    |
| SMTN    | -2141 | -2129 | - | 4.69 | GTCCCTGCCA    |
| OSBP2   | -2158 | -2146 | + | 7.26 | GGCCAGGGGCT   |
| CNTN3   | -1951 | -1939 | + | 8.98 | TTTCTGGGGGAA  |
| GXYLT2  | -2109 | -2097 | + | 5.00 | ATTTTGGGGGTA  |
| GXYLT2  | -1989 | -1977 | + | 3.60 | TTCCAGGGGAAA  |
| GXYLT2  | -1968 | -1956 | + | 3.78 | TTCCAGGGGAAG  |
| VAR2    | -2094 | -2082 | + | 5.99 | GGGTGGGGGAA   |
| VAR2    | -1996 | -1984 | + | 7.76 | GGGCTGGGGGAG  |
| _GTF2H4 | -2140 | -2128 | + | 4.32 | TGCCCTGAGGGAG |
| _GTF2H4 | -2066 | -2054 | + | 5.34 | TGTCAGGGAGCT  |
| _GTF2H4 | -1956 | -1944 | - | 3.92 | TGCCCTCATCCA  |
| CCT5    | -1974 | -1962 | + | 3.89 | TGCCAGGGATCT  |
| FAM173B | -2127 | -2115 | + | 7.04 | GTCTGGGGCCA   |

15 MA0057.1 MZF1\_5-13 9.40029161122 0.5875 70:259 9.71047928849e-05

list of hits

|              |       |     |   |      |            |
|--------------|-------|-----|---|------|------------|
| LOC102151104 | +0079 | 89  | - | 6.01 | CCCCCTCT   |
| INPP5J       | +0189 | 199 | - | 6.11 | ATGCCCCCTC |
| SELM         | +0259 | 269 | - | 6.68 | CCACCTCA   |
| PPP4R2       | +0116 | 126 | + | 8.83 | GGAGGGGAG  |
| PPP4R2       | +0177 | 187 | + | 6.91 | GGAGGCGGAG |
| PPP4R2       | +0256 | 266 | - | 7.24 | GCCCCCTCC  |
| VAR2         | +0163 | 173 | + | 6.16 | GGAGTGGGAG |
| SFTA2        | +0079 | 89  | - | 7.64 | TCTCCCTAC  |
| SFTA2        | +0156 | 166 | - | 8.55 | TTTCCCTCC  |
| _GTF2H4      | +0070 | 80  | - | 6.14 | CTCCCCATCT |
| _GTF2H4      | +0103 | 113 | - | 6.64 | TTTCCCTAT  |
| _GTF2H4      | +0174 | 184 | + | 8.06 | CGAGGGGGGA |
| _GTF2H4      | +0191 | 201 | + | 6.16 | GGAGTGGTAA |
| _GTF2H4      | +0213 | 223 | + | 6.92 | AGAGGGGAG  |
| DAP          | +0137 | 147 | + | 7.31 | CGAGGGGAAG |
| DAP          | +0246 | 256 | + | 6.16 | GGCGGGGAG  |
| CCT5         | +0225 | 235 | + | 6.40 | TGAGGGGAGG |
| FAM173B      | +0132 | 142 | + | 6.16 | GGAGTGGGAG |
