# Supplementary material for: Identification and Functional Annotation of Genes Related to Horses’ Performance: From GWAS to Post-GWAS
Source: MDPI journal article supplement (doi:10.3390/ani10071173), 2020-07-10
Supplement: s1 [file s1]

```
;TFM Explorer
;Date : Wed May 13 06:35:24 2020
;Scanned location : -3000:300
;Scanned sequences : None (12 sequences)
;Scanned matrices : (130 matrices)
;Parameters : minsize= 30, maxsize= 1500, ratio=3.0, top=25
;
; headers
; 1 rank window rank
; 2 matrix matrix name
; 3 tf transcription factor name
; 4 info information of content of the matrix
; 5 gc gc content of the matrix (G+C)%
; 6 location location of the window (relatively to TSS)
; 7 pvalue pvalue of the window
```

```
1 MA0052.1 MEF2A 15.709056118 0.179310347063 -1947:-1831
1.94083402159e-07
```

## list of hits

|         |       |       |   |       |             |
|---------|-------|-------|---|-------|-------------|
| OPCML   | -1900 | -1890 | + | 6.18  | ATATTTTAA   |
| IGSF9B  | -1894 | -1884 | + | 4.70  | TTGTTTATAG  |
| JAM3    | -1935 | -1925 | + | 4.89  | CTCTTTTAAAG |
| JAM3    | -1895 | -1885 | - | 5.13  | CTAGAAATAA  |
| NTM     | -1859 | -1849 | - | 4.68  | CTATAAATCA  |
| CCDC90B | -1940 | -1930 | - | 3.99  | TTAAAAAAG   |
| CCDC90B | -1833 | -1823 | + | 6.44  | TTATTAATAA  |
| ANKRD42 | -1834 | -1824 | + | 8.02  | TTATTTTAA   |
| PCF11   | -1873 | -1863 | + | 6.33  | TTATATTTAA  |
| RAB30   | -1946 | -1936 | + | 5.73  | TTATATAAAG  |
| RAB30   | -1862 | -1852 | - | 10.11 | CTAAAAATAA  |
| RAB30   | -1831 | -1821 | - | 4.56  | CTAAATGTAA  |
| PRCP    | -1848 | -1838 | + | 5.58  | CTATATATGA  |
| DDIAS   | -1947 | -1937 | + | 3.92  | CTACATATAT  |
| DDIAS   | -1905 | -1895 | + | 4.48  | CTCTTAATAA  |

```
2 MA0060.1 NFYA 12.9251246242 0.522629311625 -70:18 1.19747437135e-06
```

## list of hits

|        |       |     |   |       |                  |
|--------|-------|-----|---|-------|------------------|
| IGSF9B | -0070 | -54 | + | 9.19  | CAGAGCCAATCGGCCC |
| IGSF9B | -0040 | -24 | + | 7.71  | AGTGCCCAATGGGCGG |
| NTM    | -0065 | -49 | - | 5.40  | AGCCTGATTTGCCAG  |
| NTM    | +0018 | 34  | + | 6.56  | TAGAACCAATGATTGC |
| PCF11  | -0062 | -46 | + | 8.09  | GCGAGCCAATCACGCC |
| PRCP   | -0055 | -39 | + | 5.68  | GCCCTCCAATCGAATC |
| PRCP   | +0007 | 23  | + | 10.72 | CAGAGCCAATCAGAAG |
| DDIAS  | -0048 | -32 | - | 10.72 | CTTCTGATTGGCTCTG |
| DDIAS  | +0014 | 30  | - | 5.68  | GATTCGATTGGAGGGC |

```
3 MA0025.1 NFIL3 14.13850704 0.264822136611 -2024:-1926
2.47494841433e-06
```

## list of hits

|         |       |       |   |      |             |
|---------|-------|-------|---|------|-------------|
| OPCML   | -2004 | -1993 | - | 4.68 | ACCTTGCATAA |
| OPCML   | -1992 | -1981 | + | 4.82 | TTACCTAACCT |
| OPCML   | -1945 | -1934 | - | 7.08 | TAATTACATAT |
| NCAPD3  | -1926 | -1915 | - | 4.54 | CTGGTACATAA |
| CCDC90B | -2024 | -2013 | + | 4.81 | TTTTATAATAG |
| RAB30   | -1949 | -1938 | - | 7.33 | TGCTTATATAA |
| PRCP    | -2003 | -1992 | - | 4.20 | CGGTTACAGAA |
| PRCP    | -1937 | -1926 | + | 5.07 | ATATATAACTA |
| DDIAS   | -1950 | -1939 | - | 4.58 | TGGCTACATAT |

```
4 MA0148.1 FOXA1 12.5328023695 0.332119902252 -2657:-2417
8.08292959748e-06
```

## list of hits

|        |       |       |   |      |             |
|--------|-------|-------|---|------|-------------|
| OPCML  | -2420 | -2409 | - | 5.97 | CACAGCACACA |
| SPATA9 | -2547 | -2536 | - | 5.61 | TAAAATAAATA |
| IGSF9B | -2630 | -2619 | + | 6.40 | TGTTTTTTCAG |
| IGSF9B | -2551 | -2540 | - | 5.25 | CGATGTAAATA |
| JAM3   | -2522 | -2511 | + | 5.26 | TGATTGCTCAG |

|         |       |       |   |      |             |
|---------|-------|-------|---|------|-------------|
| NCAPD3  | -2626 | -2615 | - | 5.73 | CTCAGCACACA |
| CCDC90B | -2657 | -2646 | - | 6.28 | CTGAGCTAACA |
| CCDC90B | -2605 | -2594 | - | 6.28 | CTGAGCTAACA |
| CCDC90B | -2430 | -2419 | + | 5.23 | TCTTTACATTC |
| ANKRD42 | -2621 | -2610 | + | 5.98 | TGTTGACCCAC |
| PCF11   | -2645 | -2634 | - | 5.50 | TAGAATAAATA |
| PCF11   | -2611 | -2600 | - | 9.55 | ATGTGCAAACA |
| PCF11   | -2535 | -2524 | - | 7.86 | ATGTGTAAATA |
| PCF11   | -2500 | -2489 | - | 7.27 | TAGTGTAAATA |
| PCF11   | -2477 | -2466 | + | 7.86 | TATTTACACAT |
| PCF11   | -2456 | -2445 | + | 9.41 | TGTTTACATAC |
| RAB30   | -2595 | -2584 | - | 5.67 | AAATACAAATA |
| RAB30   | -2417 | -2406 | - | 6.78 | TAATACAAACA |
| PRCP    | -2580 | -2569 | + | 6.95 | TGTTTGTTCAA |
| PRCP    | -2554 | -2543 | + | 7.97 | TATTTGCATTT |

5 MA0063.1 Nkx2-5 8.26972553332 0.218487398433 -1503:-942  
1.45146299507e-05

## list of hits

|         |       |       |   |      |         |
|---------|-------|-------|---|------|---------|
| OPCML   | -1270 | -1263 | + | 6.06 | TTAATTT |
| OPCML   | -1230 | -1223 | + | 5.99 | TTAAGAG |
| OPCML   | -1078 | -1071 | + | 7.10 | ATAATTG |
| OPCML   | -1045 | -1038 | + | 6.06 | TTAATTT |
| SPATA9  | -1503 | -1496 | - | 6.10 | CTATTAT |
| SPATA9  | -1152 | -1145 | + | 6.06 | TTAATTT |
| SPATA9  | -0947 | -940  | + | 6.35 | TTAATAG |
| IGSF9B  | -1412 | -1405 | + | 7.00 | TTAAGTG |
| IGSF9B  | -1305 | -1298 | + | 5.99 | TTAAGAG |
| JAM3    | -1249 | -1242 | + | 6.06 | TTAATTT |
| NCAPD3  | -1374 | -1367 | + | 6.06 | TTAATTT |
| NTM     | -0942 | -935  | + | 5.93 | ACAATTG |
| CCDC90B | -1152 | -1145 | + | 6.06 | TTAATTT |
| CCDC90B | -1020 | -1013 | - | 6.06 | AAATTAA |
| ANKRD42 | -1393 | -1386 | + | 6.75 | ATAAGTG |
| ANKRD42 | -1371 | -1364 | + | 6.06 | TTAATTT |
| PCF11   | -1465 | -1458 | + | 6.06 | TTAATTT |
| PCF11   | -1449 | -1442 | - | 6.10 | CTATTAT |
| PCF11   | -1240 | -1233 | - | 7.10 | CAATTAT |
| PCF11   | -1146 | -1139 | + | 7.00 | TTAAGTG |
| PCF11   | -0994 | -987  | + | 6.06 | TTAATTT |
| RAB30   | -1372 | -1365 | + | 6.06 | TTAATTT |
| RAB30   | -1081 | -1074 | - | 6.06 | AAATTAA |
| PRCP    | -1326 | -1319 | + | 7.00 | TTAAGTG |

6 MA0029.1 Evil 17.9085404291 0.280423281291 -1597:-1170  
2.01428854603e-05

## list of hits

|         |       |       |   |      |                 |
|---------|-------|-------|---|------|-----------------|
| SPATA9  | -1429 | -1415 | + | 2.64 | GAAATAACATAAGA  |
| SPATA9  | -1399 | -1385 | + | 3.50 | ATGAAAATATAATT  |
| SPATA9  | -1258 | -1244 | + | 7.35 | AAGAAAAGACCAAA  |
| SPATA9  | -1170 | -1156 | - | 5.34 | TGTTTTCTTATATA  |
| JAM3    | -1551 | -1537 | - | 3.62 | TGTGATCTTGTTCT  |
| JAM3    | -1407 | -1393 | - | 4.65 | CATTATCTCATGTT  |
| JAM3    | -1307 | -1293 | + | 2.81 | GACAAAAGAGAAGA  |
| JAM3    | -1242 | -1228 | - | 2.29 | CTCTATTTTGTGTT  |
| NCAPD3  | -1202 | -1188 | + | 5.56 | GATATAAGATACTA  |
| CCDC90B | -1182 | -1168 | - | 4.31 | TCTAATCTTTTTTTT |
| ANKRD42 | -1521 | -1507 | - | 7.44 | TTTTCTCTTATCTG  |
| ANKRD42 | -1197 | -1183 | + | 3.67 | CTGGTAAGACAAAA  |
| PCF11   | -1361 | -1347 | + | 2.87 | GAGAAAATACAAGC  |
| PCF11   | -1279 | -1265 | - | 2.69 | AACAATCTTGTAACA |
| RAB30   | -1597 | -1583 | - | 7.59 | ATTTATCTTGTAACA |
| RAB30   | -1565 | -1551 | + | 5.61 | CACATAAGATCATT  |
| RAB30   | -1470 | -1456 | - | 2.43 | GTTTAGCCTTTCTT  |
| PRCP    | -1541 | -1527 | - | 3.07 | ATTAGTCTTGTAACA |
| PRCP    | -1465 | -1451 | - | 3.64 | ACTGGTCTTTTCCT  |
| PRCP    | -1352 | -1338 | - | 3.58 | ATCACTCTTATCTT  |
| PRCP    | -1225 | -1211 | - | 2.91 | GTCTATCTTGTTCA  |

7 MA0100.1 Myb 9.88327768463 0.590686273136 -1662:-587  
2.30863082472e-05

## list of hits

|         |       |       |   |      |          |
|---------|-------|-------|---|------|----------|
| OPCML   | -0998 | -990  | + | 8.53 | GGCCGTTG |
| IGSF9B  | -1201 | -1193 | - | 6.45 | CAACAGCC |
| IGSF9B  | -1046 | -1038 | - | 6.45 | CAACTGTA |
| IGSF9B  | -0658 | -650  | + | 6.36 | CGCAGTTG |
| NCAPD3  | -1489 | -1481 | - | 6.58 | CAACTGCA |
| NCAPD3  | -1336 | -1328 | + | 6.39 | GTCAGTTG |
| NTM     | -1129 | -1121 | + | 6.58 | TGCAGTTG |
| ANKRD42 | -1121 | -1113 | - | 6.23 | CAACTGTG |
| ANKRD42 | -0929 | -921  | - | 6.91 | CAACTGTT |
| ANKRD42 | -0648 | -640  | + | 6.50 | GGCAGTTA |
| PCF11   | -0773 | -765  | + | 6.45 | GGCTGTTG |
| RAB30   | -0596 | -588  | - | 8.47 | CAACCGCC |
| RAB30   | -0587 | -579  | - | 8.35 | CAACTGTC |
| PRCP    | -1496 | -1488 | - | 8.35 | CAACTGTC |
| PRCP    | -0984 | -976  | + | 6.58 | TGCAGTTG |
| DDIAS   | -1662 | -1654 | + | 6.32 | GACTGTTG |
| DDIAS   | -1650 | -1642 | - | 6.58 | CAACTGCA |
| DDIAS   | -1473 | -1465 | + | 6.39 | GTCGGTTG |

8 MA0152.1 NFATC2 9.85861508532 0.346153842592 -1808:-1458  
2.82129056678e-05

## list of hits

|         |       |       |   |      |          |
|---------|-------|-------|---|------|----------|
| OPCML   | -1790 | -1783 | + | 7.20 | TTTTCCCT |
| OPCML   | -1682 | -1675 | + | 6.81 | ATTTCCA  |
| OPCML   | -1621 | -1614 | + | 8.69 | TTTTCCA  |
| OPCML   | -1494 | -1487 | + | 6.92 | TTTTCCC  |
| IGSF9B  | -1653 | -1646 | + | 6.42 | GTTTCCA  |
| JAM3    | -1638 | -1631 | - | 7.20 | AGGAAAA  |
| NCAPD3  | -1790 | -1783 | + | 8.69 | TTTTCCA  |
| NCAPD3  | -1651 | -1644 | - | 6.37 | TGGAACA  |
| NTM     | -1466 | -1459 | - | 7.20 | AGGAAAA  |
| CCDC90B | -1711 | -1704 | - | 6.92 | GGGAAAA  |
| CCDC90B | -1650 | -1643 | - | 6.42 | TGGAAC   |
| PCF11   | -1762 | -1755 | + | 8.69 | TTTTCCA  |
| PCF11   | -1534 | -1527 | - | 7.20 | AGGAAAA  |
| PCF11   | -1491 | -1484 | - | 8.69 | TGGAACA  |
| RAB30   | -1731 | -1724 | + | 7.20 | TTTTCCCT |
| RAB30   | -1677 | -1670 | + | 6.81 | ATTTCCA  |
| PRCP    | -1682 | -1675 | + | 7.20 | TTTTCCCT |
| PRCP    | -1636 | -1629 | + | 6.81 | ATTTCCA  |
| PRCP    | -1477 | -1470 | + | 8.69 | TTTTCCA  |
| PRCP    | -1458 | -1451 | + | 7.20 | TTTTCCCT |
| DDIAS   | -1808 | -1801 | - | 6.81 | TGGAAT   |
| DDIAS   | -1555 | -1548 | - | 6.42 | TGGAAC   |

9 MA0081.1 SPIB 9.06007130057 0.466472323191 191:258 4.57438269372e-05

## list of hits

|         |       |     |   |      |         |
|---------|-------|-----|---|------|---------|
| NCAPD3  | +0211 | 218 | + | 7.09 | ACAGGAA |
| NCAPD3  | +0251 | 258 | + | 6.55 | TCAGGAA |
| NTM     | +0210 | 217 | + | 6.55 | TCAGGAA |
| NTM     | +0258 | 265 | + | 7.82 | AGAGGAA |
| ANKRD42 | +0191 | 198 | + | 6.60 | AGGGGAA |
| ANKRD42 | +0231 | 238 | - | 7.82 | TTCTCT  |
| PCF11   | +0234 | 241 | + | 7.82 | AGAGGAA |
| DDIAS   | +0256 | 263 | + | 7.82 | AGAGGAA |

10 MA0442.1 SOX10 7.96992529398 0.386363640428 -2233:-2196  
4.95980366363e-05

## list of hits

|         |       |       |   |      |        |
|---------|-------|-------|---|------|--------|
| IGSF9B  | -2233 | -2227 | + | 6.89 | CTTTGT |
| JAM3    | -2210 | -2204 | + | 6.67 | CATTGT |
| CCDC90B | -2196 | -2190 | - | 6.89 | ACAAAG |
| ANKRD42 | -2217 | -2211 | - | 6.67 | ACAATG |
| ANKRD42 | -2207 | -2201 | + | 6.89 | CTTTGT |
| DDIAS   | -2207 | -2201 | + | 6.89 | CTTTGT |

11 MA0080.2 SPI1 9.64024729829 0.435374151649 -2362:-2189  
5.07215345463e-05

## list of hits

|         |       |       |   |      |          |
|---------|-------|-------|---|------|----------|
| SPATA9  | -2339 | -2332 | + | 6.78 | AGGAAAT  |
| SPATA9  | -2204 | -2197 | - | 6.78 | ATTTCCCT |
| IGSF9B  | -2221 | -2214 | - | 6.42 | ACTTTCT  |
| NCAPD3  | -2229 | -2222 | - | 6.42 | ACTTTCT  |
| NTM     | -2362 | -2355 | - | 8.65 | ACTTCCT  |
| NTM     | -2343 | -2336 | - | 6.42 | ACTTTCT  |
| NTM     | -2287 | -2280 | - | 6.45 | ACTTCTT  |
| NTM     | -2223 | -2216 | + | 6.45 | AAGAAGT  |
| NTM     | -2201 | -2194 | - | 6.78 | ATTTCCCT |
| CCDC90B | -2359 | -2352 | + | 6.31 | AGGAAGA  |
| ANKRD42 | -2346 | -2339 | - | 6.81 | GCTTCCT  |
| ANKRD42 | -2189 | -2182 | - | 6.31 | TCTTCCT  |
| PCF11   | -2353 | -2346 | - | 6.28 | AGTTCCT  |
| PCF11   | -2342 | -2335 | - | 6.42 | ACTTTCT  |

12 MA0135.1 Lhx3 16.3541414376 0.130769234437 -1166:-798  
5.19814301523e-05

## list of hits

|         |       |       |   |       |                |
|---------|-------|-------|---|-------|----------------|
| OPCML   | -1051 | -1038 | - | 3.42  | ATAGACTTAATTT  |
| OPCML   | -0818 | -805  | + | 6.84  | AGATTAACTAAAA  |
| SPATA9  | -1158 | -1145 | - | 4.54  | TATTTGTTAATTT  |
| JAM3    | -1102 | -1089 | + | 3.53  | GATTGAATTATTT  |
| JAM3    | -1065 | -1052 | - | 3.98  | GGTAATGTAATTA  |
| JAM3    | -0933 | -920  | + | 3.53  | TAATTTAGTATAC  |
| JAM3    | -0888 | -875  | + | 4.27  | AACTAAATATAC   |
| JAM3    | -0798 | -785  | + | 4.97  | TATTTTACTAATG  |
| NTM     | -1009 | -996  | + | 5.88  | GAATTTATTAGAA  |
| NTM     | -0808 | -795  | - | 3.77  | AGAAGATAAAATGT |
| CCDC90B | -1166 | -1153 | + | 3.42  | TAAATAATCATTAA |
| CCDC90B | -1023 | -1010 | - | 4.99  | TATAAATTAATAA  |
| CCDC90B | -0984 | -971  | - | 9.27  | AAATATTTAATGA  |
| CCDC90B | -0838 | -825  | + | 3.46  | TGATTATTTTTCT  |
| ANKRD42 | -1026 | -1013 | + | 6.83  | GACTAATTATTC   |
| ANKRD42 | -0921 | -908  | - | 5.34  | AAATAGGTAATTA  |
| RAB30   | -1135 | -1122 | - | 13.29 | AGTTAATTAATTA  |
| RAB30   | -1115 | -1102 | - | 5.91  | GATTTTTTAATTA  |
| RAB30   | -1084 | -1071 | - | 5.12  | CACAAATTAAACA  |
| PRCP    | -1141 | -1128 | + | 4.26  | GAATAAACTAACT  |

13 MA0038.1 Gfi 9.47016685671 0.390566043556 -2261:-2123  
8.11958586816e-05

## list of hits

|         |       |       |   |      |             |
|---------|-------|-------|---|------|-------------|
| JAM3    | -2137 | -2127 | + | 6.22 | TGAATCATTTG |
| NCAPD3  | -2157 | -2147 | - | 7.20 | GGGTGATTTT  |
| CCDC90B | -2123 | -2113 | + | 6.12 | CAAATCCCAT  |
| ANKRD42 | -2184 | -2174 | - | 7.51 | CTCAGATTTTG |
| ANKRD42 | -2125 | -2115 | - | 6.92 | GACTGATTTT  |
| PCF11   | -2261 | -2251 | - | 7.74 | CAGAGATTTT  |
| RAB30   | -2159 | -2149 | - | 7.19 | CTTAGATTTTG |
| DDIAS   | -2252 | -2242 | + | 6.91 | CAAATCTTAG  |
| DDIAS   | -2212 | -2202 | + | 7.01 | CAAATCTTTG  |
| DDIAS   | -2196 | -2186 | - | 7.10 | CGGAGATTTT  |
