# Supplementary material for: Identification and Functional Annotation of Genes Related to Horses’ Performance: From GWAS to Post-GWAS
Source: MDPI journal article supplement (doi:10.3390/ani10071173), 2020-07-10
Supplement: s1 [file s1]

## ;TFM Explorer

;Date : Wed May 13 06:29:37 2020  
 ;Scanned location : -3000:300  
 ;Scanned sequences : None (2 sequences)  
 ;Scanned matrices : (130 matrices)  
 ;Parameters : minsize= 30, maxsize= 1500, ratio=3.0, top=25

;

## ; headers

; 1 rank window rank  
 ; 2 matrix matrix name  
 ; 3 tf transcription factor name  
 ; 4 info information of content of the matrix  
 ; 5 gc gc content of the matrix (G+C)%  
 ; 6 location location of the window (relatively to TSS)  
 ; 7 pvalue pvalue of the window

1 MA0006.1 Arnt::Ahr 9.53241699429 0.715277771155 -288:-55  
 1.68156944989e-07

## list of hits

|        |       |      |   |      |        |
|--------|-------|------|---|------|--------|
| SORCS3 | -0288 | -282 | + | 7.37 | TGCGTG |
| SORCS3 | -0277 | -271 | - | 7.05 | CACGCG |
| SORCS3 | -0219 | -213 | - | 7.37 | CACGCA |
| SORCS3 | -0193 | -187 | - | 7.37 | CACGCA |
| SORCS3 | -0069 | -63  | - | 7.37 | CACGCA |
| SORCS3 | -0061 | -55  | - | 7.05 | CACGCG |
| SORCS3 | -0055 | -49  | - | 7.37 | CACGCA |
